# Supplementary material for: Dinuclear iridium complexes ligated by lithium-ion endohedral fullerene Li+@C60
Source: Royal Society of Chemistry journal article supplement (doi:10.1039/d4cc05485g), 2025-01-01
Supplement: d4cc05485g1.pdf [file d4cc05485g1.pdf]

**Electronic Supplementary Information**

**Dinuclear iridium complexes ligated by lithium-ion endohedral  
fullerene  $\text{Li}^+ @ \text{C}_{60}$**

Chinari Fukushi, Takashi Komuro\* and Hisako Hashimoto\*

Department of Chemistry, Graduate School of Science, Tohoku University, Sendai 980-8578, Japan.

To whom correspondence should be addressed.

[hisako.hashimoto.b7@tohoku.ac.jp](mailto:hisako.hashimoto.b7@tohoku.ac.jp)

[takashi.komuro.c5@tohoku.ac.jp](mailto:takashi.komuro.c5@tohoku.ac.jp)

## Contents

---

|                                                                                                                                                                                     |     |
|-------------------------------------------------------------------------------------------------------------------------------------------------------------------------------------|-----|
| <b>1. Experimental procedures and characterisation data</b>                                                                                                                         | S3  |
| 1-1. Modified procedure for the synthesis of Ir <sub>2</sub> Br <sub>2</sub> (cod) <sub>2</sub>                                                                                     | S4  |
| 1-2. Synthesis of [ $\{\mu\text{-}\eta^2\text{:}\eta^2\text{-(Li}^+\text{@C}_{60}\text{)}\}\{\text{Ir}_2\text{Cl}_2(\text{cod})_2\}$ ](NTf <sub>2</sub> <sup>-</sup> ) ( <b>1</b> ) | S4  |
| 1-3. Synthesis of [ $\{\mu\text{-}\eta^2\text{:}\eta^2\text{-(Li}^+\text{@C}_{60}\text{)}\}\{\text{Ir}_2\text{Br}_2(\text{cod})_2\}$ ](NTf <sub>2</sub> <sup>-</sup> ) ( <b>2</b> ) | S5  |
| 1-4. Synthesis of [ $\{\mu\text{-}\eta^2\text{:}\eta^2\text{-(Li}^+\text{@C}_{60}\text{)}\}\{\text{Ir}_2\text{I}_2(\text{cod})_2\}$ ](NTf <sub>2</sub> <sup>-</sup> ) ( <b>3</b> )  | S5  |
| 1-5. Measurements of VT <sup>13</sup> C{ <sup>1</sup> H} and low temperature 2D NMR spectra of <b>1</b>                                                                             | S6  |
| <b>2. X-ray crystal structure analysis</b>                                                                                                                                          | S7  |
| 2-1. Refinement details on the crystal structure analysis (Table S1)                                                                                                                | S7  |
| 2-2. Crystal structures and selected bond distances and angles (Figs. S1–S3, Table S2)                                                                                              | S10 |
| <b>3. NMR spectra and high-resolution mass spectrometry</b> (Figs. S4–S19)                                                                                                          | S14 |
| <b>4. UV/Vis spectra of complexes 1–3</b> (Fig. S20)                                                                                                                                | S25 |
| <b>5. Electrochemistry of complexes 1–3 and Ir<sub>2</sub>X<sub>2</sub>(cod)<sub>2</sub></b> (Figs. S21 and S22, Table S3)                                                          | S26 |
| <b>6. DFT calculations</b>                                                                                                                                                          | S28 |
| 6-1. Optimised structures of the cation parts of complexes <b>1–3</b> :<br><b>1-opt</b> , <b>2-opt</b> and <b>3-opt</b> (Figs. S23–S25, Tables S4–S9)                               | S29 |
| 6-2. Frontier orbitals and energy levels of <b>1-opt</b> , <b>2-opt</b> and <b>3-opt</b> (Figs. S26–S28)                                                                            | S35 |
| 6-3. NBO analysis of <b>1-opt</b> , <b>2-opt</b> and <b>3-opt</b> (Figs. S29–S31)                                                                                                   | S38 |
| 6-4. GIAO calculations and assignments of the proton signals of cod ligands<br>in <b>1-opt</b> (Figs. S32–S34)                                                                      | S39 |
| 6-5. TD-DFT calculations (Figs. S35–S37, Tables S10–S12)                                                                                                                            | S40 |
| <b>7. References</b>                                                                                                                                                                | S47 |

---

## 1. Experimental procedures and characterisation data

**General procedures.** All manipulations were performed in a glovebox (Ar atmosphere) or using Schlenk techniques (N<sub>2</sub> atmosphere) unless otherwise indicated.

**Materials.** All solvents were dried and stored under argon over 4 Å molecular sieves in a glovebox prior to use. Et<sub>2</sub>O, THF and MeCN were dried using a Glass Contour alumina column (Nikko Hansen & Co., Ltd.). CD<sub>2</sub>Cl<sub>2</sub>, CHCl<sub>3</sub>, CDCl<sub>3</sub>, TCE (1,1,2,2-tetrachloroethane) and *o*-DCB (1,2-dichlorobenzene) were dried over CaH<sub>2</sub> and distilled before use. Ir<sub>2</sub>X<sub>2</sub>(cod)<sub>2</sub> (X = Cl<sup>S1</sup> and I<sup>S2</sup>) were prepared according to the literature procedures. Ir<sub>2</sub>Br<sub>2</sub>(cod)<sub>2</sub> was synthesised with some modification of the literature procedure<sup>S2</sup> (see below). [Li<sup>+</sup>@C<sub>60</sub>](NTf<sub>2</sub><sup>-</sup>) was prepared by the anion exchange of [Li<sup>+</sup>@C<sub>60</sub>](PF<sub>6</sub><sup>-</sup>), which was supplied from Idea International Corporation, with LiNTf<sub>2</sub>.<sup>S3</sup> LiBr was purchased from Tokyo Chemical Industry Co., Ltd. AgNO<sub>3</sub> was purchased from Kanto Chemical Co., Inc. [<sup>n</sup>Bu<sub>4</sub>N](PF<sub>6</sub><sup>-</sup>) was purchased from FUJIFILM Wako Pure Chemical Co., Ltd. and recrystallized from hot EtOH prior to use. [<sup>n</sup>Bu<sub>4</sub>N](NTf<sub>2</sub><sup>-</sup>) was prepared by the anion exchange of [<sup>n</sup>Bu<sub>4</sub>N](Cl<sup>-</sup>), which was purchased from Kanto Chemical Co., Ltd., with LiNTf<sub>2</sub>.

**Spectroscopic measurements.** The NMR spectra were recorded on a Bruker AVANCE III 400 Fourier transform spectrometer (<sup>1</sup>H: 400.1 MHz, <sup>7</sup>Li: 155.5 MHz, <sup>13</sup>C: 100.6 MHz). Chemical shifts are reported in parts per million. Line widths at half-height ( $\Delta\nu_{1/2}$ ) are given in Hz. <sup>1</sup>H NMR chemical shifts were referenced to the residual proton (CHCl<sub>3</sub>: 7.26 ppm and CDHCl<sub>2</sub>: 5.32 ppm). <sup>7</sup>Li NMR chemical shifts were referenced to LiCl/D<sub>2</sub>O (0.0 ppm) as an external standard. <sup>13</sup>C{<sup>1</sup>H} NMR chemical shifts were referenced to the carbon of deuterated solvents (CDCl<sub>3</sub>: 77.2 ppm and CD<sub>2</sub>Cl<sub>2</sub>: 53.8 ppm). <sup>13</sup>C{<sup>1</sup>H} NMR signals of cod ligands were assigned based on <sup>1</sup>H-<sup>13</sup>C HSQC experiments. All NMR data were collected at room temperature unless otherwise indicated. High-resolution mass spectra (HRMS) were obtained by use of a Bruker Daltonics solariX 9.4T spectrometer operating in the electrospray ionisation (ESI) mode. Elemental analysis was performed using a J-Science Lab JM11 microanalyzer. Measurements of HRMS and elemental analysis were performed at the Research and Analytical Center for Giant Molecules, Tohoku University. UV/Vis spectra were measured on a Shimadzu Multi-Spec-1500 spectrometer. Cyclic Voltammetry (CV) and Differential Pulse Voltammetry (DPV) measurements were performed using a BAS ALS-620D electrochemical analyser.

### 1-1. Modified procedure for the synthesis of Ir<sub>2</sub>Br<sub>2</sub>(cod)<sub>2</sub>

Ir<sub>2</sub>Cl<sub>2</sub>(cod)<sub>2</sub> (152 mg, 226 μmol) and LiBr (153 mg, 1.77 mmol, 7.8 equiv.) were placed in a 50 mL Schlenk flask, which was moved into a glove box. THF (5 mL) and CHCl<sub>3</sub> (5 mL) were added to the reactants to give a yellow solution. After the solution was stirred at room temperature for 20 h, the colour of the solution turned into orange. The solution was then evaporated under vacuum. The resulting reddish orange solid was extracted with *ca.* 10 mL of CHCl<sub>3</sub> and filtered. The filtrate was evaporated under vacuum to dryness, which afforded a dark red solid of Ir<sub>2</sub>Br<sub>2</sub>(cod)<sub>2</sub> (171 mg, 225 μmol, 99%). Ir<sub>2</sub>Br<sub>2</sub>(cod)<sub>2</sub> was identified by comparison of the <sup>1</sup>H NMR data with the literature values,<sup>S2</sup> and its purity was confirmed by the elemental analysis. <sup>1</sup>H NMR (CDCl<sub>3</sub>): δ 4.30–4.38 (br m, 8H, CH), 2.13–2.29 (br m, 8H, CH<sub>2</sub>), 1.37–1.52 (br m, 8H, CH<sub>2</sub>); <sup>13</sup>C{<sup>1</sup>H} NMR (CDCl<sub>3</sub>): δ 62.4 (s, CH), 32.0 (s, CH<sub>2</sub>); Anal. calcd. for C<sub>16</sub>H<sub>24</sub>Br<sub>2</sub>Ir<sub>2</sub>: C, 25.27; H, 3.18; found: C, 25.33; H, 3.29; UV/Vis (CH<sub>2</sub>Cl<sub>2</sub>, 1.0 × 10<sup>-3</sup> M, 1 mm quartz cell) λ<sub>max</sub> / nm (ε / M<sup>-1</sup> cm<sup>-1</sup>): 334 (2.4 × 10<sup>3</sup>), 405 (2.4 × 10<sup>3</sup>), 473 (4.2 × 10<sup>3</sup>), 673 (63).

### 1-2. Synthesis of [{μ-η<sup>2</sup>:η<sup>2</sup>-(Li<sup>+</sup>@C<sub>60</sub>)}{Ir<sub>2</sub>Cl<sub>2</sub>(cod)<sub>2</sub>}] (NTf<sub>2</sub><sup>-</sup>) (1)

In the air, [Li<sup>+</sup>@C<sub>60</sub>](NTf<sub>2</sub><sup>-</sup>) (1.22 mg, 1.21 μmol) was weighed into a 5 mL vial equipped with a magnetic stirring bar, and Ir<sub>2</sub>Cl<sub>2</sub>(cod)<sub>2</sub> (0.81 mg, 1.21 μmol, 1.0 equiv.) was weighed into another 5 mL vial. These vials were moved into a glove box. To each of the vials, 1,1,2,2-tetrachloroethane (TCE) (0.2 and 0.4 mL, respectively) was added and mixed. The resulting yellow solution of Ir<sub>2</sub>Cl<sub>2</sub>(cod)<sub>2</sub> was added to the purple solution of [Li<sup>+</sup>@C<sub>60</sub>](NTf<sub>2</sub><sup>-</sup>) with stirring. The colour of the solution instantaneously turned into dark reddish-brown. After stirring at room temperature for 5 min, the reaction mixture was filtered. Recrystallisation from the filtrate by vapour diffusion of Et<sub>2</sub>O as poor solvent at -30 °C afforded complex **1** as black crystals (1.80 mg, 1.07 μmol, 89%). <sup>1</sup>H NMR (CD<sub>2</sub>Cl<sub>2</sub>): δ 5.33–5.45 (br m, 2H, CH), 4.92–5.15 (br m, 4H, CH), 3.62–3.83 (br m, 2H, CH), 2.78–3.00 (br m, 2H, CH<sub>2</sub>), 2.61–2.74 (br m, 2H, CH<sub>2</sub>), 2.48–2.61 (br m, 2H, CH<sub>2</sub>), 2.33–2.48 (br m, 4H, CH<sub>2</sub>), 2.01–2.33 (br m, 4H, CH<sub>2</sub>), 1.66–1.76 (br m, 2H, CH<sub>2</sub>); <sup>7</sup>Li NMR (CD<sub>2</sub>Cl<sub>2</sub>): δ -11.0 (br s, Δν<sub>1/2</sub> = 14 Hz); HRMS (ESI, positive) *m/z* calcd. for [<sup>12</sup>C<sub>76</sub><sup>1</sup>H<sub>24</sub><sup>7</sup>Li<sup>35</sup>Cl<sub>2</sub><sup>193</sup>Ir<sub>2</sub>]<sup>+</sup> ([M]<sup>+</sup>): 1399.0667, found: 1399.0682; UV/Vis (CH<sub>2</sub>Cl<sub>2</sub>, 1.0 × 10<sup>-4</sup> M, 1 mm quartz cell) λ<sub>max</sub> / nm (ε / M<sup>-1</sup> cm<sup>-1</sup>): 327 (4.4 × 10<sup>4</sup>), 416 (9.8 × 10<sup>3</sup>), 530 (3.5 × 10<sup>3</sup>).

### 1-3. Synthesis of $[\{\mu\text{-}\eta^2\text{:}\eta^2\text{-(Li}^+\text{@C}_{60}\text{)}\}\{\text{Ir}_2\text{Br}_2(\text{cod})_2\}](\text{NTf}_2^-)$ (**2**)

In a procedure similar to that for complex **1**, the title compound was synthesised using  $[\text{Li}^+\text{@C}_{60}](\text{NTf}_2^-)$  (1.42 mg, 1.41  $\mu\text{mol}$ ) and  $\text{Ir}_2\text{Br}_2(\text{cod})_2$  (1.07 mg, 1.41  $\mu\text{mol}$ , 1.0 equiv.) in TCE. Filtration of the resulting dark reddish-brown reaction mixture, followed by recrystallisation and vapour diffusion of  $\text{Et}_2\text{O}$  at  $-30\text{ }^\circ\text{C}$  afforded complex **2** as black crystals (2.14 mg, 1.21  $\mu\text{mol}$ , 86%).  $^1\text{H}$  NMR ( $\text{CD}_2\text{Cl}_2$ ):  $\delta$  5.16–5.30 (br m, 4H, CH), 5.04–5.16 (br m, 2H, CH), 3.57–3.84 (br m, 2H, CH), 2.86–3.07 (br m, 2H,  $\text{CH}_2$ ), 2.67–2.86 (br m, 2H,  $\text{CH}_2$ ), 2.42–2.67 (br m, 4H,  $\text{CH}_2$ ), 2.26–2.42 (br m, 4H,  $\text{CH}_2$ ), 2.11–2.26 (br m, 2H,  $\text{CH}_2$ ), 1.45–1.65 (br m, 2H,  $\text{CH}_2$ );  $^7\text{Li}$  NMR ( $\text{CD}_2\text{Cl}_2$ ):  $\delta$  -11.0 (br s,  $\Delta\nu_{1/2} = 26$  Hz); HRMS (ESI, positive)  $m/z$  calcd. for  $[\text{}^{12}\text{C}_{76}\text{}^1\text{H}_{24}\text{}^7\text{Li}\text{}^{79}\text{Br}_2\text{}^{193}\text{Ir}_2]^+$  ( $[\text{M}]^+$ ): 1488.9642, found: 1488.9639; UV/Vis ( $\text{CH}_2\text{Cl}_2$ ,  $1.0 \times 10^{-4}$  M, 1 mm quartz cell)  $\lambda_{\text{max}}$  / nm ( $\epsilon / \text{M}^{-1} \text{cm}^{-1}$ ): 327 ( $4.2 \times 10^4$ ), 420 ( $1.2 \times 10^4$ ), 538 ( $5.1 \times 10^3$ ).

### 1-4. Synthesis of $[\{\mu\text{-}\eta^2\text{:}\eta^2\text{-(Li}^+\text{@C}_{60}\text{)}\}\{\text{Ir}_2\text{I}_2(\text{cod})_2\}](\text{NTf}_2^-)$ (**3**)

In a procedure similar to that for complex **1**, the title compound was synthesised using  $[\text{Li}^+\text{@C}_{60}](\text{NTf}_2^-)$  (2.00 mg, 1.98  $\mu\text{mol}$ ) and  $\text{Ir}_2\text{I}_2(\text{cod})_2$  (1.71 mg, 2.00  $\mu\text{mol}$ , 1.0 equiv.) in TCE. The dark reddish-brown reaction mixture was worked up similarly to give complex **3** as black crystals (3.34 mg, 1.79  $\mu\text{mol}$ , 90%).  $^1\text{H}$  NMR ( $\text{CD}_2\text{Cl}_2$ ):  $\delta$  5.30–5.60 (br m, 2H, CH), 5.20–5.30 (br m, 2H, CH), 4.96–5.20 (br m, 2H, CH), 3.39–3.80 (br m, 2H, CH), 2.75–3.27 (br m, 4H,  $\text{CH}_2$ ), 2.36–2.75 (br m, 6H,  $\text{CH}_2$ ), 2.15–2.36 (br m, 2H,  $\text{CH}_2$ ), 1.84–2.15 (br m, 2H,  $\text{CH}_2$ ), 1.18–1.63 (br m, 2H,  $\text{CH}_2$ );  $^7\text{Li}$  NMR ( $\text{CD}_2\text{Cl}_2$ ):  $\delta$  -11.0 (br s,  $\Delta\nu_{1/2} = 32$  Hz); HRMS (ESI, positive)  $m/z$  calcd. for  $[\text{}^{12}\text{C}_{76}\text{}^1\text{H}_{25}\text{}^{16}\text{O}\text{}^7\text{Li}\text{}^{127}\text{I}\text{}^{193}\text{Ir}_2]^+$  ( $[\text{M} - ^{127}\text{I} + ^1\text{H} + ^{16}\text{O}]^+$ ): 1473.0377, found: 1473.0373;  $m/z$  calcd. for  $[\text{}^{12}\text{C}_{76}\text{}^1\text{H}_{24}\text{}^7\text{Li}\text{}^{35}\text{Cl}\text{}^{127}\text{I}\text{}^{193}\text{Ir}_2]^+$  ( $[\text{M} - ^{127}\text{I} + ^{35}\text{Cl}]^+$ ): 1491.0033, found: 1491.0024; \* UV/Vis ( $\text{CH}_2\text{Cl}_2$ ,  $1.0 \times 10^{-4}$  M, 1 mm quartz cell)  $\lambda_{\text{max}}$  / nm ( $\epsilon / \text{M}^{-1} \text{cm}^{-1}$ ): 328 ( $5.1 \times 10^4$ ), 415 ( $1.5 \times 10^4$ ), 550 ( $6.9 \times 10^3$ ).

\*Note: In the mass spectrum of complex **3**, the molecular ion peak of the cation part of **3** was not detected. Instead, the peaks of cations, in which one iodido ligand was replaced with OH or Cl, were observed (Figs. S30 and S31), possibly as a result of facile hydrolysis with  $\text{H}_2\text{O}$  or the reaction with  $\text{CHCl}_3$  used as a washing solvent during the measurement. These data support the core structure of **3** and thus are indicated here.

## 1-5. Measurements of VT $^{13}\text{C}\{^1\text{H}\}$ and low temperature 2D NMR spectra of **1**

In a glove box, complex **1** (5.23 mg, 3.11  $\mu\text{mol}$ ) was placed in a Pyrex NMR tube (5 mm o.d.) fitted with a ground-glass joint, and then  $\text{CD}_2\text{Cl}_2$  (0.4 mL) was added and mixed to form a dark reddish-brown solution. The NMR tube was equipped with a Teflon valve and connected to a vacuum line. After the solution was degassed by a freeze-pump-thaw cycle, the NMR tube was sealed under reduced pressure using a gas burner. The  $^{13}\text{C}\{^1\text{H}\}$  NMR spectra of the sample were collected at 300 and 200 K. The  $^1\text{H}\text{-}^1\text{H}$  COSY and  $^1\text{H}\text{-}^{13}\text{C}$  HSQC spectra were measured at 200 K.

$^{13}\text{C}\{^1\text{H}\}$  NMR ( $\text{CD}_2\text{Cl}_2$ , 300 K):  $\delta$  140–150 (br m,  $\text{C}_{60}$ ), 120.3 (q,  $^1J_{\text{CF}} = 319.2$  Hz,  $\text{CF}_3$  of  $\text{NTf}_2^-$ ), 90.5 (s, CH of cod), 89.3 (s, CH of cod), 80.0 (s, CH of cod), 75.3 (s, CH of cod), 39.9 (s,  $\text{CH}_2$  of cod), 37.8 (s,  $\text{CH}_2$  of cod), 28.1 (s,  $\text{CH}_2$  of cod), 25.4 (s,  $\text{CH}_2$  of cod).

$^{13}\text{C}\{^1\text{H}\}$  NMR ( $\text{CD}_2\text{Cl}_2$ , 200 K):  $\delta$  152.0 (s,  $\text{C}_{60}$ ), 149.0 (s,  $\text{C}_{60}$ ), 148.1 (s,  $\text{C}_{60}$ ), 146.4 (s,  $\text{C}_{60}$ ), 145.5 (s,  $\text{C}_{60}$ ), 145.4 (s,  $\text{C}_{60}$ ), 145.1 (s,  $\text{C}_{60}$ ), 145.0 (s,  $\text{C}_{60}$ ), 144.7 (s,  $\text{C}_{60}$ ), 144.5 (s,  $\text{C}_{60}$ ), 144.22 (s,  $\text{C}_{60}$ ), 144.17 (s,  $\text{C}_{60}$ ), 144.0 (s,  $\text{C}_{60}$ ), 143.7 (s,  $\text{C}_{60}$ ), 143.4 (s,  $\text{C}_{60}$ ), 143.3 (s,  $\text{C}_{60}$ ), 143.2 (s,  $\text{C}_{60}$ ), 142.7 (s,  $\text{C}_{60}$ ), 142.6 (s,  $\text{C}_{60}$ ), 142.4 (s,  $\text{C}_{60}$ ), 142.2 (s,  $\text{C}_{60}$ ), 141.3 (s,  $\text{C}_{60}$ ), 141.0 (s,  $\text{C}_{60}$ ), 140.9 (s,  $\text{C}_{60}$ ), 140.4 (s,  $\text{C}_{60}$ ), 139.7 (s,  $\text{C}_{60}$ ), 137.2 (s,  $\text{C}_{60}$ ), 135.5 (s,  $\text{C}_{60}$ ), 118.9 (q,  $^1J_{\text{CF}} = 318.5$  Hz,  $\text{CF}_3$  of  $\text{NTf}_2^-$ ), 89.9 (s, CH of cod), 88.7 (s, CH of cod), 83.3 (s, Ir–C of  $\text{C}_{60}$ ), 78.6 (s, CH of cod), 74.3 (s, CH of cod), 57.5 (s, Ir–C of  $\text{C}_{60}$ ), 39.2 (s,  $\text{CH}_2$  of cod), 37.1 (s,  $\text{CH}_2$  of cod), 26.8 (s,  $\text{CH}_2$  of cod), 24.3 (s,  $\text{CH}_2$  of cod).

## 2. X-ray crystal structure analysis

**General procedures.** Single crystals of  $1 \cdot \text{C}_2\text{H}_2\text{Cl}_4$ ,  $2 \cdot \text{C}_2\text{H}_2\text{Cl}_4$  and  $3 \cdot \text{C}_2\text{H}_2\text{Cl}_4$  suitable for X-ray diffraction were obtained by vapour diffusion of  $\text{Et}_2\text{O}$  into a TCE solution of complexes **1–3** at  $-30\text{ }^\circ\text{C}$  in a week. X-ray diffraction data were collected on a Rigaku XtaLAB mini II diffractometer with graphite-monochromated Mo  $K\alpha$  radiation ( $\lambda = 0.71073\text{ \AA}$ ) under cold nitrogen stream ( $T = 150\text{ K}$ ). Single crystals suitable for diffraction measurements were coated with liquid paraffin and were mounted on a polyimide loop. Empirical absorption correction using the multiscan method was applied to the data. The structures were solved by dual space methods using SHELXT<sup>S4</sup> and refined by full-matrix least-squares technique on  $F^2$  with SHELXL<sup>S5</sup> using Olex2 1.5 software<sup>S6</sup> (OlexSys Ltd, 2018) or Yadokari-XG 2009 software<sup>S7,S8</sup> as graphical user interfaces. Except disordered atoms described below, all hydrogen atoms were placed at their geometrically calculated positions and refined riding on the corresponding carbon atoms with isotropic thermal parameters. All non-hydrogen atoms were refined anisotropically. CCDC reference numbers: 2389980 (for  $1 \cdot \text{C}_2\text{H}_2\text{Cl}_4$ ), 2389981 (for  $2 \cdot \text{C}_2\text{H}_2\text{Cl}_4$ ) and 2389982 (for  $3 \cdot \text{C}_2\text{H}_2\text{Cl}_4$ ). Crystallographic data are available as a CIF file.

### 2-1. Refinement details on the crystal structure analysis

**$1 \cdot \text{C}_2\text{H}_2\text{Cl}_4$ :** The crystal contains three kinds of disordered moieties, i.e., the  $\text{Li}^+$  centre, the counter anion ( $\text{NTf}_2^-$ ) and the crystal solvent ( $\text{C}_2\text{H}_2\text{Cl}_4$ ). The lithium atom was disordered in two positions (53% and 47% occupancy) and was refined with anisotropic temperature factors suppressed using SIMU and ISOR commands of the SHELXL program. All atoms of the counter anion ( $\text{NTf}_2^-$ ) were disordered in three positions (41%, 38% and 21% occupancy).<sup>\*1</sup> The crystal solvent ( $\text{C}_2\text{H}_2\text{Cl}_4$ ) was also disordered in three positions (44%, 30% and 26% occupancy).<sup>\*1</sup> For the disordered  $\text{NTf}_2^-$  and  $\text{C}_2\text{H}_2\text{Cl}_4$ , their geometrical positions were suppressed using DFIX and DANG commands and refined anisotropically. The temperature factors of these atoms were treated with the RIGU and SIMU commands or constrained using the EADP command. In some cases, the ISOR command was also used for restraint of the temperature factors. The final  $R$ -factors were  $R1 = 0.0274$  and  $wR2 = 0.0655$  for 12686 reflections with  $I > 2\sigma(I)$ .

**[Note \*1]** We also examined the analysis using a two-component model, but the three-component model gave us better results that were reported here.

**2·C<sub>2</sub>H<sub>2</sub>Cl<sub>4</sub>:** The crystal contains three kinds of disordered moieties, i.e., the Li<sup>+</sup> centre, the counter anion (NTf<sub>2</sub><sup>-</sup>) and crystal solvent (C<sub>2</sub>H<sub>2</sub>Cl<sub>4</sub>). The lithium atom was disordered in two positions (60% and 40% occupancy) and was refined with anisotropic temperature factors suppressed using SIMU and ISOR commands of the SHELXL program. All atoms of the counter anion (NTf<sub>2</sub><sup>-</sup>) were disordered in three positions (45%, 29% and 26% occupancy).<sup>\*1</sup> The crystal solvent (C<sub>2</sub>H<sub>2</sub>Cl<sub>4</sub>) was also disordered in three positions (53%, 28% and 19% occupancy).<sup>\*1</sup> For the disordered NTf<sub>2</sub><sup>-</sup> and C<sub>2</sub>H<sub>2</sub>Cl<sub>4</sub>, their geometrical positions were suppressed using DFIX and DANG commands and refined anisotropically. The temperature factors of these atoms were treated with the RIGU and SIMU commands or constrained using the EADP command. In some cases, the ISOR command was also used for restraint of the temperature factors. The final *R*-factors were *R*1 = 0.0323 and *wR*2 = 0.0713 for 12758 reflections with *I* > 2σ(*I*).

**[Note \*1]** We also examined the analysis using a two-component model, but the three-component model gave us better results that were reported here.

**3·C<sub>2</sub>H<sub>2</sub>Cl<sub>4</sub>:** The crystal contains three kinds of disordered moieties, i.e., the Li<sup>+</sup> centre, the counter anion (NTf<sub>2</sub><sup>-</sup>) and crystal solvent (C<sub>2</sub>H<sub>2</sub>Cl<sub>4</sub>). The lithium atom was disordered in two positions (60% and 40% occupancy) and was refined with anisotropic temperature factors suppressed using SIMU and ISOR commands of the SHELXL program. All atoms of the counter anion (NTf<sub>2</sub><sup>-</sup>) were also disordered in two positions (68% and 32% occupancy).<sup>\*2</sup> The crystal solvent (C<sub>2</sub>H<sub>2</sub>Cl<sub>4</sub>) was disordered in two positions (68% and 32% occupancy).<sup>\*2</sup> For the disordered NTf<sub>2</sub><sup>-</sup> and C<sub>2</sub>H<sub>2</sub>Cl<sub>4</sub>, their geometrical positions were suppressed using DFIX and DANG commands and refined anisotropically. The temperature factors of these atoms were treated with the RIGU and SIMU commands or constrained using the EADP command. In some cases, the ISOR command was also used for restraint of the temperature factors. The final *R*-factors were *R*1 = 0.0432 and *wR*2 = 0.1148 for 10156 reflections with *I* > 2σ(*I*).<sup>\*3</sup>

**[Note \*2]** For **3·C<sub>2</sub>H<sub>2</sub>Cl<sub>4</sub>**, the analysis of the disordering moieties (the counter anion and crystal solvents) using a three-component model did not give better results than that using the two-component model, which was reported here.

**[Note \*3]** In the checkCIF report, the following level A alerts remain.

PLAT972\_ALERT\_2\_A Check Calcd Resid. Dens. 0.79Ang From I1 -3.85 e Å<sup>-3</sup>

PLAT972\_ALERT\_2\_A Check Calcd Resid. Dens. 0.76Ang From I1 -3.57 e Å<sup>-3</sup>

We tried to improve them using numerical and empirical absorption correction methods and also re-analysis by omitting very weak reflections, but all these efforts resulted in failure. Nevertheless, we believe that the core structure of **3** is confirmed by the present analysis.



**Table S1** Crystallographic data

| Compound                                                                     | <b>1·C<sub>2</sub>H<sub>2</sub>Cl<sub>4</sub></b>                                                               | <b>2·C<sub>2</sub>H<sub>2</sub>Cl<sub>4</sub></b>                                                                               | <b>3·C<sub>2</sub>H<sub>2</sub>Cl<sub>4</sub></b>                                                                              |
|------------------------------------------------------------------------------|-----------------------------------------------------------------------------------------------------------------|---------------------------------------------------------------------------------------------------------------------------------|--------------------------------------------------------------------------------------------------------------------------------|
| Empirical formula                                                            | C <sub>80</sub> H <sub>26</sub> LiNO <sub>4</sub> F <sub>6</sub> S <sub>2</sub> Cl <sub>6</sub> Ir <sub>2</sub> | C <sub>80</sub> H <sub>26</sub> LiNO <sub>4</sub> F <sub>6</sub> S <sub>2</sub> Cl <sub>4</sub> Br <sub>2</sub> Ir <sub>2</sub> | C <sub>80</sub> H <sub>26</sub> LiNO <sub>4</sub> F <sub>6</sub> S <sub>2</sub> Cl <sub>4</sub> I <sub>2</sub> Ir <sub>2</sub> |
| Formula weight                                                               | 1847.18                                                                                                         | 1936.10                                                                                                                         | 2030.08                                                                                                                        |
| Temperature / K                                                              | 150(2)                                                                                                          | 150(2)                                                                                                                          | 150(2)                                                                                                                         |
| Crystal system                                                               | Triclinic                                                                                                       | Triclinic                                                                                                                       | Triclinic                                                                                                                      |
| Space group                                                                  | <i>P</i> -1 (#2)                                                                                                | <i>P</i> -1 (#2)                                                                                                                | <i>P</i> -1 (#2)                                                                                                               |
| <i>a</i> / Å                                                                 | 13.6564(2)                                                                                                      | 13.6166(2)                                                                                                                      | 13.6521(3)                                                                                                                     |
| <i>b</i> / Å                                                                 | 14.5752(4)                                                                                                      | 14.6678(3)                                                                                                                      | 14.7289(3)                                                                                                                     |
| <i>c</i> / Å                                                                 | 15.8044(4)                                                                                                      | 15.8666(3)                                                                                                                      | 16.0559(3)                                                                                                                     |
| $\alpha$ / °                                                                 | 115.334(3)                                                                                                      | 115.5674(19)                                                                                                                    | 115.704(2)                                                                                                                     |
| $\beta$ / °                                                                  | 98.0777(16)                                                                                                     | 97.7068(14)                                                                                                                     | 97.1726(18)                                                                                                                    |
| $\gamma$ / °                                                                 | 92.7062(16)                                                                                                     | 93.1991(13)                                                                                                                     | 93.7882(18)                                                                                                                    |
| <i>V</i> / Å <sup>3</sup>                                                    | 2794.71(13)                                                                                                     | 2809.83(10)                                                                                                                     | 2860.07(11)                                                                                                                    |
| <i>Z</i>                                                                     | 2                                                                                                               | 2                                                                                                                               | 2                                                                                                                              |
| $\rho_{\text{calcd}}$ / g·cm <sup>-3</sup>                                   | 2.195                                                                                                           | 2.288                                                                                                                           | 2.357                                                                                                                          |
| $\mu$ / mm <sup>-1</sup>                                                     | 5.205                                                                                                           | 6.504                                                                                                                           | 6.072                                                                                                                          |
| <i>F</i> (000)                                                               | 1780                                                                                                            | 1852                                                                                                                            | 1924                                                                                                                           |
| Crystal size / mm <sup>3</sup>                                               | 0.25 × 0.13 × 0.10                                                                                              | 0.14 × 0.13 × 0.05                                                                                                              | 0.15 × 0.12 × 0.05                                                                                                             |
| 2 $\theta$ range / °                                                         | 4.080 to 54.966                                                                                                 | 4.060 to 54.968                                                                                                                 | 4.316 to 50.246                                                                                                                |
| Reflections collected                                                        | 50708                                                                                                           | 53901                                                                                                                           | 38933                                                                                                                          |
| Independent reflections                                                      | 12686                                                                                                           | 12758                                                                                                                           | 10156                                                                                                                          |
| <i>R</i> <sub>int</sub>                                                      | 0.0245                                                                                                          | 0.0380                                                                                                                          | 0.0397                                                                                                                         |
| Refined parameters                                                           | 1163                                                                                                            | 1127                                                                                                                            | 1023                                                                                                                           |
| <i>R</i> 1, <i>wR</i> 2 [all data] <sup>a,b</sup>                            | 0.0349, 0.0684                                                                                                  | 0.0484, 0.0761                                                                                                                  | 0.0537, 0.1209                                                                                                                 |
| <i>R</i> 1, <i>wR</i> 2 [ <i>I</i> > 2 $\sigma$ ( <i>I</i> )] <sup>a,b</sup> | 0.0274, 0.0655                                                                                                  | 0.0323, 0.0713                                                                                                                  | 0.0432, 0.1148                                                                                                                 |
| GOF                                                                          | 1.031                                                                                                           | 1.025                                                                                                                           | 1.035                                                                                                                          |
| Largest residual peak,<br>hole / e·Å <sup>-3</sup>                           | 3.04 / -1.62                                                                                                    | 1.39 / -0.76                                                                                                                    | 2.45 / -3.93                                                                                                                   |

$$^a R1 = \sum ||F_o| - |F_c|| / \sum |F_o|, \quad ^b wR2 = \{ \sum [w(F_o^2 - F_c^2)^2] / \sum [w(F_o^2)^2] \}^{1/2}$$

## 2-2. Crystal structures and selected bond distances and angles

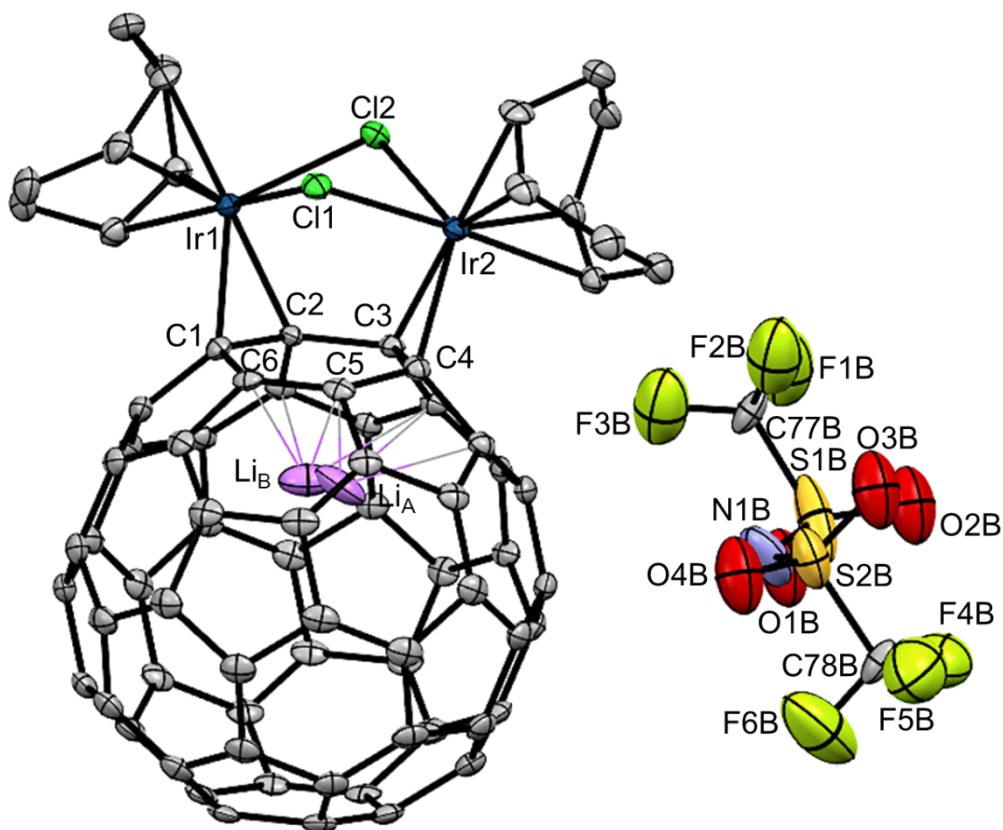

**Fig. S1** Molecular structure of **1** with thermal ellipsoids at the 50% probability level. The crystalline solvent  $C_2H_2Cl_4$  is omitted. For the disordered counter anion  $NTf_2^-$ , only one fragment with the higher occupancy (41%) is shown for clarity. Selected interatomic distances (Å) and angles ( $^\circ$ ): Ir1–C1 2.170(4), Ir1–C2 2.162(4), Ir2–C3 2.169(4), Ir2–C4 2.170(4), Ir1–Cl1 2.4025(9), Ir1–Cl2 2.5395(9), Ir2–Cl1 2.3955(9), Ir2–Cl2 2.5471(10), C1–C2 1.488(5), C2–C3 1.531(5), C3–C4 1.499(5), C4–C5 1.497(5), C5–C6 1.385(5), C6–C1 1.499(5), Li<sub>A</sub>–C1 2.69(7), Li<sub>B</sub>–C1 2.34(4), Li<sub>A</sub>–C2 2.46(6), Li<sub>B</sub>–C2 2.22(4), Li<sub>A</sub>–C3 2.22(3), Li<sub>B</sub>–C3 2.33(6), Li<sub>A</sub>–C4 2.25(3), Li<sub>B</sub>–C4 2.56(7), Li<sub>A</sub>–C5 2.34(3), Li<sub>B</sub>–C5 2.50(5), Li<sub>A</sub>–C6 2.55(5), Li<sub>B</sub>–C6 2.40(4), Ir1–Cl1–Ir2 92.12(3), Ir1–Cl2–Ir2 85.56(3), Cl1–Ir1–Cl2 78.30(3), Cl1–Ir2–Cl2 78.27(3).

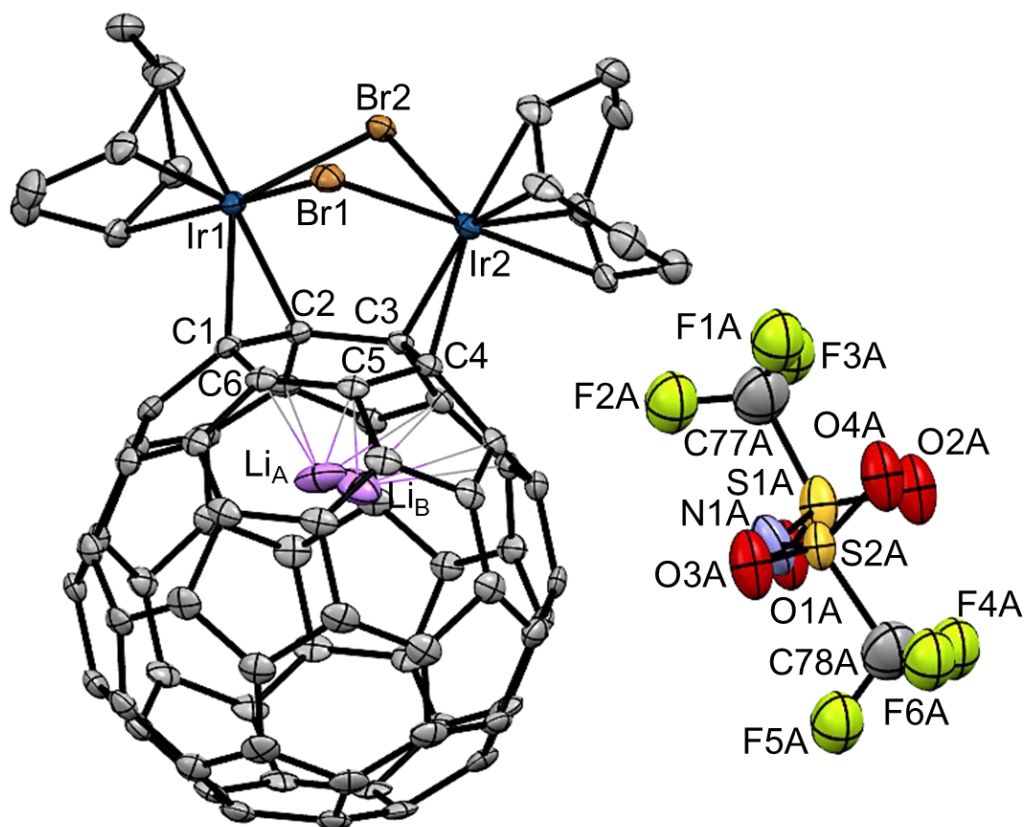

**Fig. S2** Molecular structure of **2** with thermal ellipsoids at the 50% probability level. The crystalline solvent  $C_2H_2Cl_4$  is omitted. For the disordered counter anion  $NTf_2^-$ , only one fragment with the higher occupancy (45%) is shown for clarity. Selected interatomic distances ( $\text{\AA}$ ) and angles ( $^\circ$ ): Ir1–C1 2.177(4), Ir1–C2 2.164(4), Ir2–C3 2.166(4), Ir2–C4 2.169(4), Ir1–Br1 2.5269(5), Ir1–Br2 2.6428(5), Ir2–Br1 2.5255(5), Ir2–Br2 2.6489(5), C1–C2 1.494(6), C2–C3 1.542(6), C3–C4 1.489(6), C4–C5 1.510(6), C5–C6 1.372(7), C6–C1 1.502(7), Li<sub>A</sub>–C1 2.38(4), Li<sub>B</sub>–C1 2.81(9), Li<sub>A</sub>–C2 2.26(3), Li<sub>B</sub>–C2 2.52(8), Li<sub>A</sub>–C3 2.32(4), Li<sub>B</sub>–C3 2.23(5), Li<sub>A</sub>–C4 2.51(5), Li<sub>B</sub>–C4 2.28(5), Li<sub>A</sub>–C5 2.45(4), Li<sub>B</sub>–C5 2.45(5), Li<sub>A</sub>–C6 2.40(3), Li<sub>B</sub>–C6 2.68(8), Ir1–Br1–Ir2 89.012(17), Ir1–Br2–Ir2 84.023(15), Br1–Ir1–Br2 79.330(16), Br1–Ir2–Br2 79.237(17).

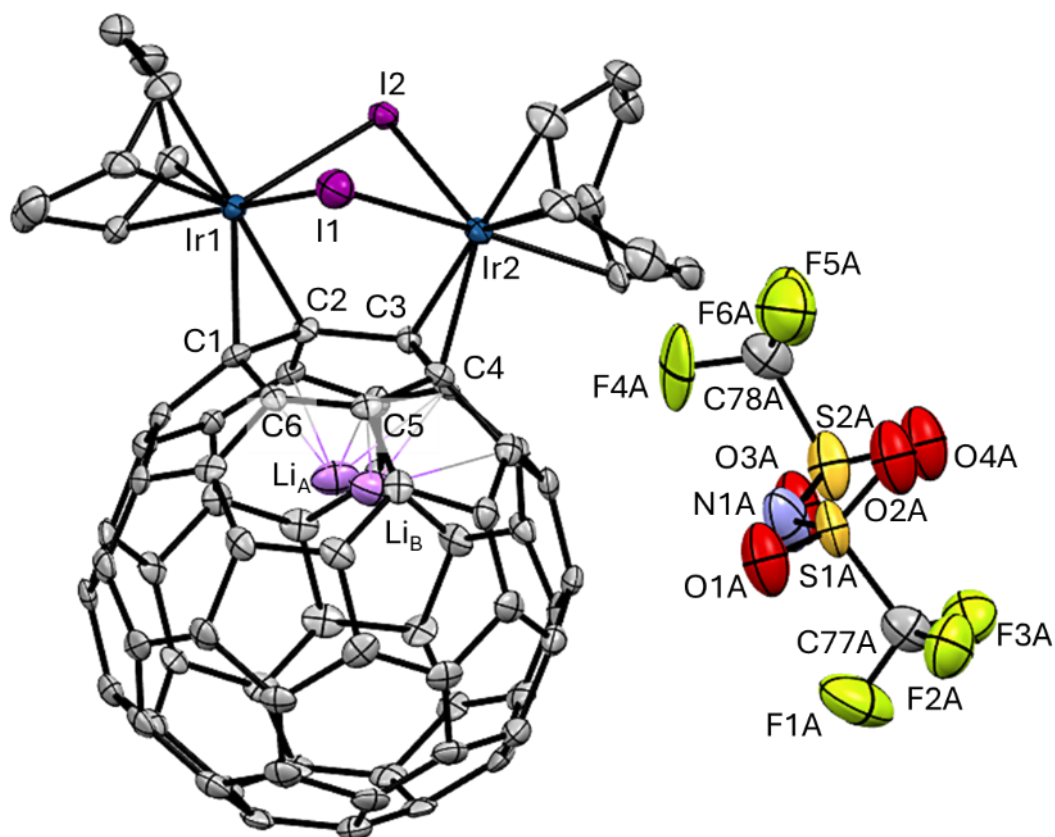

**Fig. S3** Molecular structure of **3** with thermal ellipsoids at the 50% probability level. The crystalline solvent  $C_2H_2Cl_4$  is omitted for clarity. For the disordered counter anion  $NTf_2^-$ , only one fragment with the higher occupancy (68%) is shown for clarity. Selected interatomic distances (Å) and angles ( $^\circ$ ): Ir1–C1 2.187(8), Ir1–C2 2.184(8), Ir2–C3 2.175(8), Ir2–C4 2.185(8), Ir1–I1 2.6877(8), Ir1–I2 2.7611(6), Ir2–I1 2.6747(7), Ir2–I2 2.7740(6), C1–C2 1.497(11), C2–C3 1.535(11), C3–C4 1.502(11), C4–C5 1.501(11), C5–C6 1.387(11), C6–C1 1.506(11), Li<sub>A</sub>–C1 2.38(5), Li<sub>B</sub>–C1 2.81(9), Li<sub>A</sub>–C2 2.24(5), Li<sub>B</sub>–C2 2.57(8), Li<sub>A</sub>–C3 2.29(5), Li<sub>B</sub>–C3 2.25(7), Li<sub>A</sub>–C4 2.47(6), Li<sub>B</sub>–C4 2.20(7), Li<sub>A</sub>–C5 2.45(5), Li<sub>B</sub>–C5 2.32(8), Li<sub>A</sub>–C6 2.40(4), Li<sub>B</sub>–C6 2.60(9), Ir1–I1–Ir2 85.68(2), Ir1–I2–Ir2 82.402(17), I1–Ir1–I2 80.27(2), I1–Ir2–I2 80.26(2).

**Table S2** Selected bond distances (Å) and angles (°) for **1–3**

|                                      | 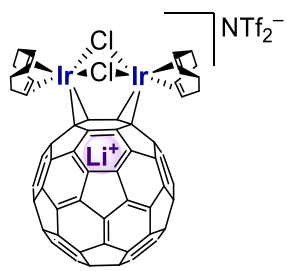 |  |  |
|--------------------------------------|-----------------------------------------------------------------------------------|------------------------------------------------------------------------------------|-------------------------------------------------------------------------------------|
|                                      | <b>1</b>                                                                          | <b>2</b>                                                                           | <b>3</b>                                                                            |
| Ir1–C1                               | 2.170(4)                                                                          | 2.177(4)                                                                           | 2.187(8)                                                                            |
| Ir1–C2                               | 2.162(4)                                                                          | 2.164(4)                                                                           | 2.184(8)                                                                            |
| Ir2–C3                               | 2.169(4)                                                                          | 2.166(4)                                                                           | 2.175(8)                                                                            |
| Ir2–C4                               | 2.170(4)                                                                          | 2.169(4)                                                                           | 2.185(8)                                                                            |
| Ir1–X1                               | 2.4025(9)                                                                         | 2.5269(5)                                                                          | 2.6877(8)                                                                           |
| Ir1–X2                               | 2.5395(9)                                                                         | 2.6428(5)                                                                          | 2.7611(6)                                                                           |
| Ir2–X1                               | 2.3955(9)                                                                         | 2.5255(5)                                                                          | 2.6747(7)                                                                           |
| Ir2–X2                               | 2.5471(10)                                                                        | 2.6489(5)                                                                          | 2.7740(6)                                                                           |
| C1–C2                                | 1.488(5)                                                                          | 1.494(6)                                                                           | 1.497(11)                                                                           |
| C2–C3                                | 1.531(5)                                                                          | 1.542(6)                                                                           | 1.535(11)                                                                           |
| C3–C4                                | 1.499(5)                                                                          | 1.489(6)                                                                           | 1.502(11)                                                                           |
| C4–C5                                | 1.497(5)                                                                          | 1.510(6)                                                                           | 1.501(11)                                                                           |
| C5–C6                                | 1.385(5)                                                                          | 1.372(7)                                                                           | 1.387(11)                                                                           |
| C6–C1                                | 1.499(5)                                                                          | 1.502(7)                                                                           | 1.506(11)                                                                           |
| Li <sub>A</sub> /Li <sub>B</sub> –C1 | 2.69(7)/2.34(4)                                                                   | 2.38(4)/2.81(9)                                                                    | 2.38(5)/2.81(9)                                                                     |
| Li <sub>A</sub> /Li <sub>B</sub> –C2 | 2.46(6)/2.22(4)                                                                   | 2.26(3)/2.52(8)                                                                    | 2.24(5)/2.57(8)                                                                     |
| Li <sub>A</sub> /Li <sub>B</sub> –C3 | 2.22(3)/2.33(6)                                                                   | 2.32(4)/2.23(5)                                                                    | 2.29(5)/2.25(7)                                                                     |
| Li <sub>A</sub> /Li <sub>B</sub> –C4 | 2.25(3)/2.56(7)                                                                   | 2.51(5)/2.28(5)                                                                    | 2.47(6)/2.20(7)                                                                     |
| Li <sub>A</sub> /Li <sub>B</sub> –C5 | 2.34(3)/2.50(5)                                                                   | 2.45(4)/2.45(5)                                                                    | 2.45(5)/2.32(8)                                                                     |
| Li <sub>A</sub> /Li <sub>B</sub> –C6 | 2.55(5)/2.40(4)                                                                   | 2.40(3)/2.68(8)                                                                    | 2.40(4)/2.60(9)                                                                     |
| Ir1–X1–Ir2                           | 92.12(3)                                                                          | 89.012(17)                                                                         | 85.68(2)                                                                            |
| Ir1–X2–Ir2                           | 85.56(3)                                                                          | 84.023(15)                                                                         | 82.402(17)                                                                          |
| X1–Ir1–X2                            | 78.30(3)                                                                          | 79.330(16)                                                                         | 80.27(2)                                                                            |
| X1–Ir2–X2                            | 78.27(3)                                                                          | 79.237(17)                                                                         | 80.26(2)                                                                            |

### 3. NMR spectra and high-resolution mass spectrometry

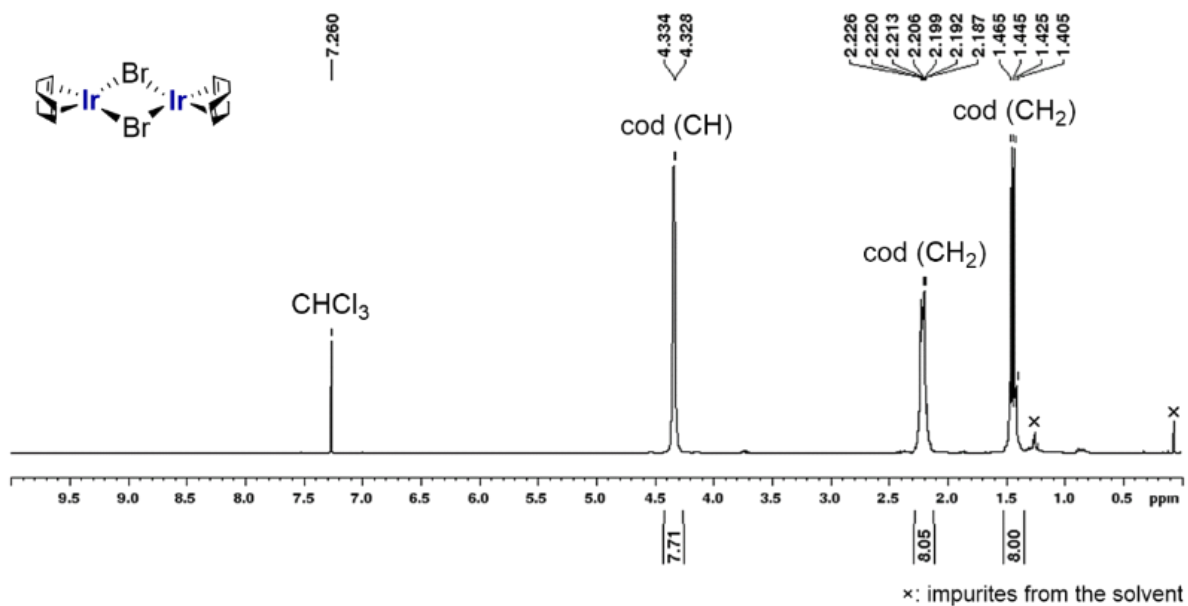

**Fig. S4**  $^1\text{H}$  NMR spectrum of  $\text{Ir}_2\text{Br}_2(\text{cod})_2$  ( $\text{CDCl}_3$ , 400 MHz, r.t.).

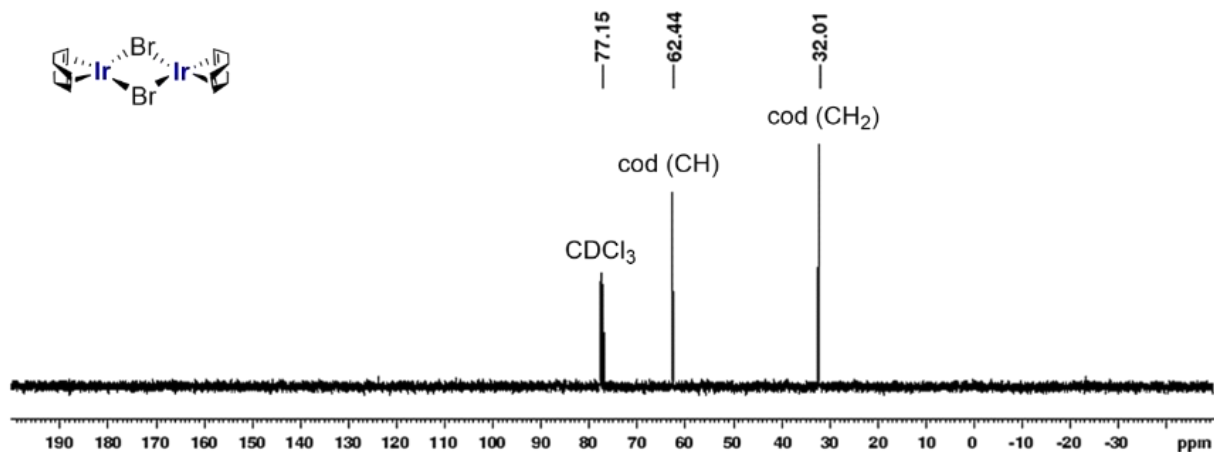

**Fig. S5**  $^{13}\text{C}\{^1\text{H}\}$  NMR spectrum of  $\text{Ir}_2\text{Br}_2(\text{cod})_2$  ( $\text{CDCl}_3$ , 101 MHz, r.t.).

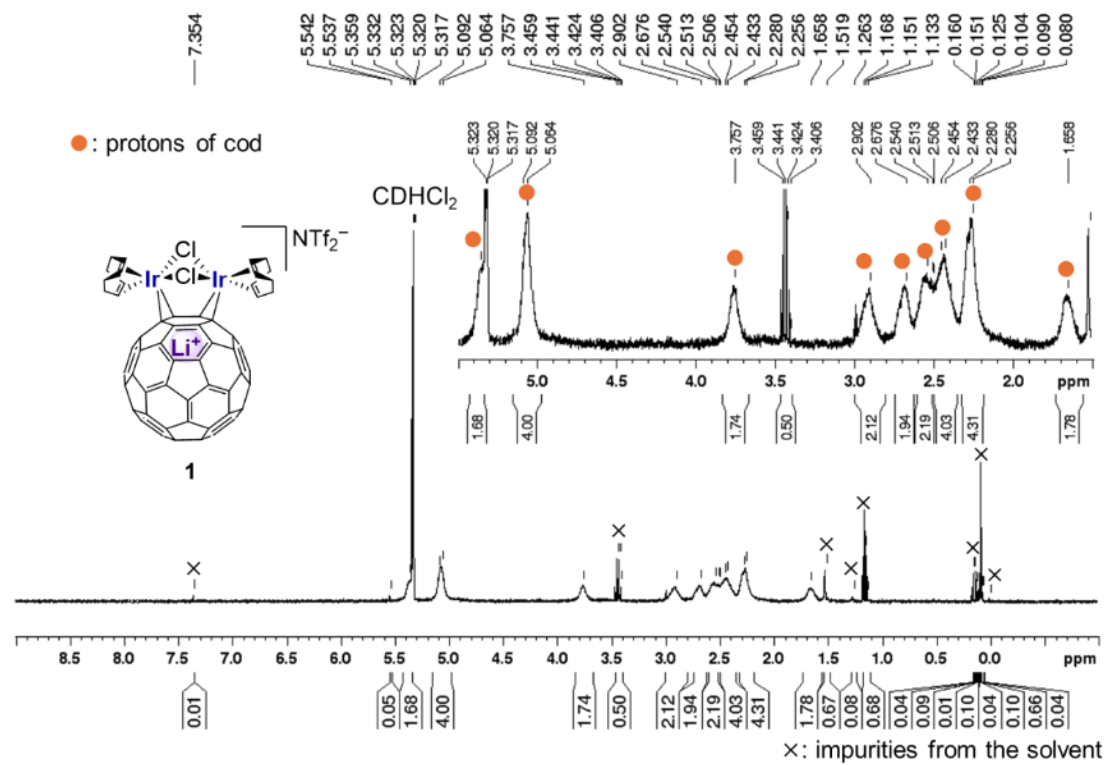

**Fig. S6**  $^1\text{H}$  NMR spectrum of  $[\{\mu\text{-}\eta^2\text{:}\eta^2\text{-}(\text{Li}^+\text{@C}_{60})\}\{\text{Ir}_2\text{Cl}_2(\text{cod})_2\}]$  (**1**) ( $\text{CD}_2\text{Cl}_2$ , 400 MHz, r.t.).

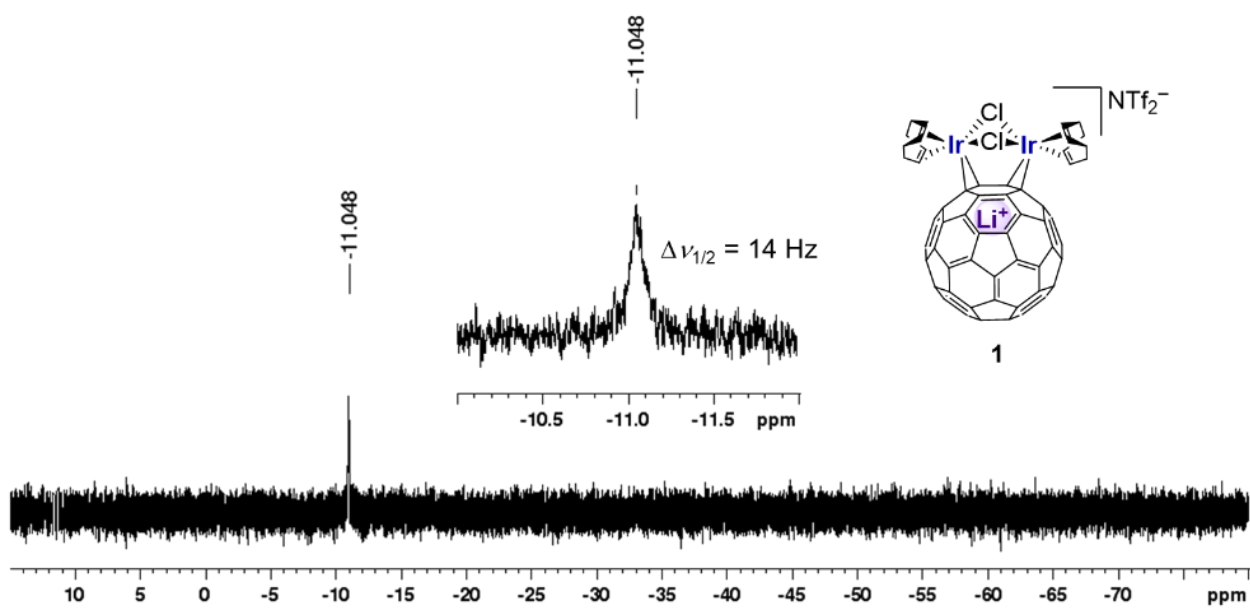

**Fig. S7**  $^7\text{Li}$  NMR spectrum of **1** ( $\text{CD}_2\text{Cl}_2$ , 156 MHz, r.t.).

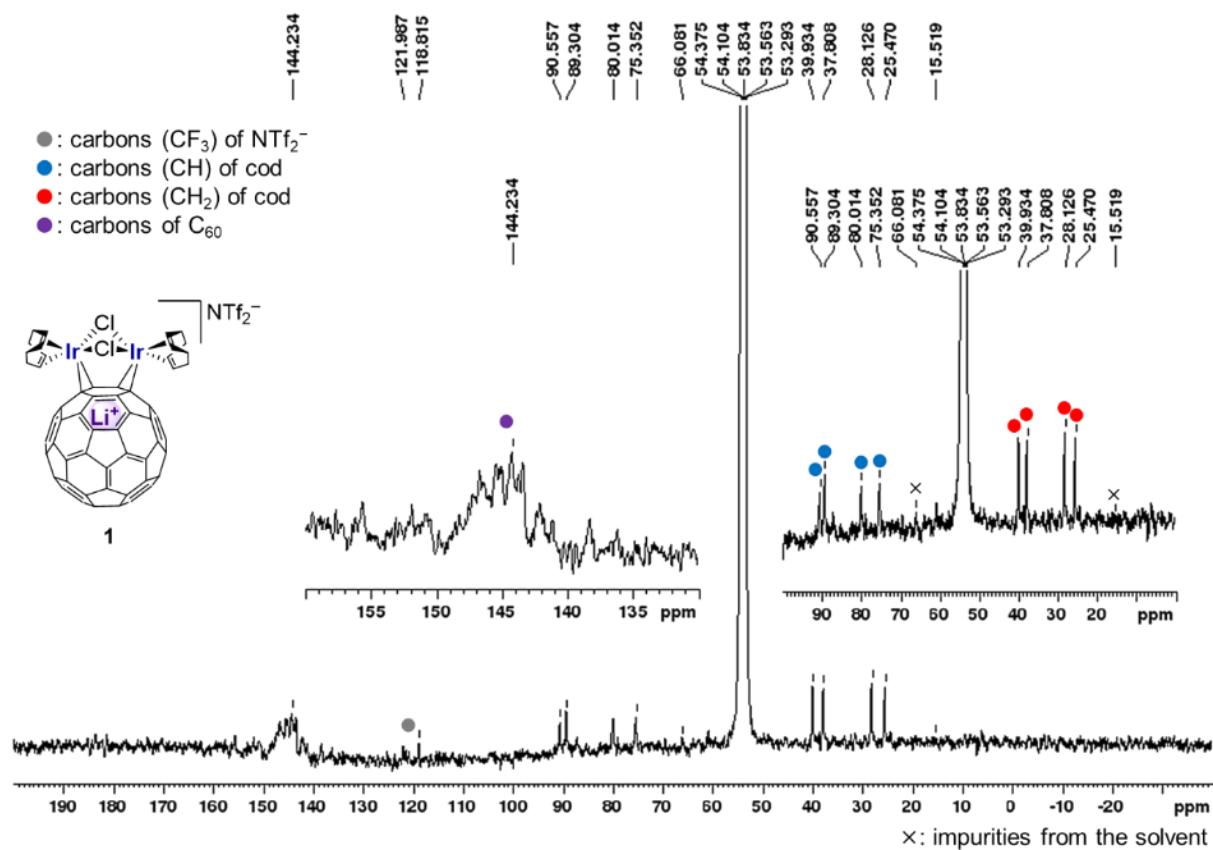

Fig. S8 <sup>13</sup>C {<sup>1</sup>H} NMR spectrum of **1** (CD<sub>2</sub>Cl<sub>2</sub>, 101 MHz, 300 K).

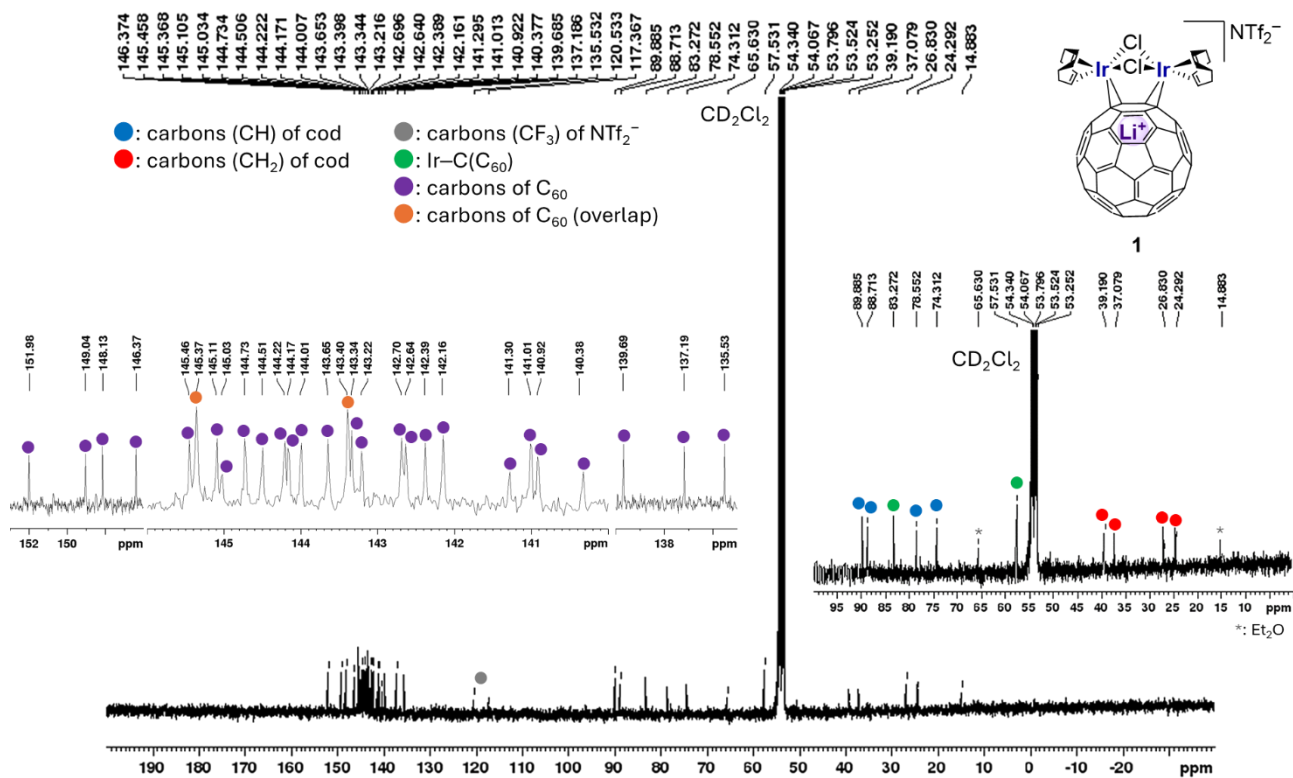

Fig. S9 <sup>13</sup>C {<sup>1</sup>H} NMR spectrum of **1** (CD<sub>2</sub>Cl<sub>2</sub>, 101 MHz, 200 K).



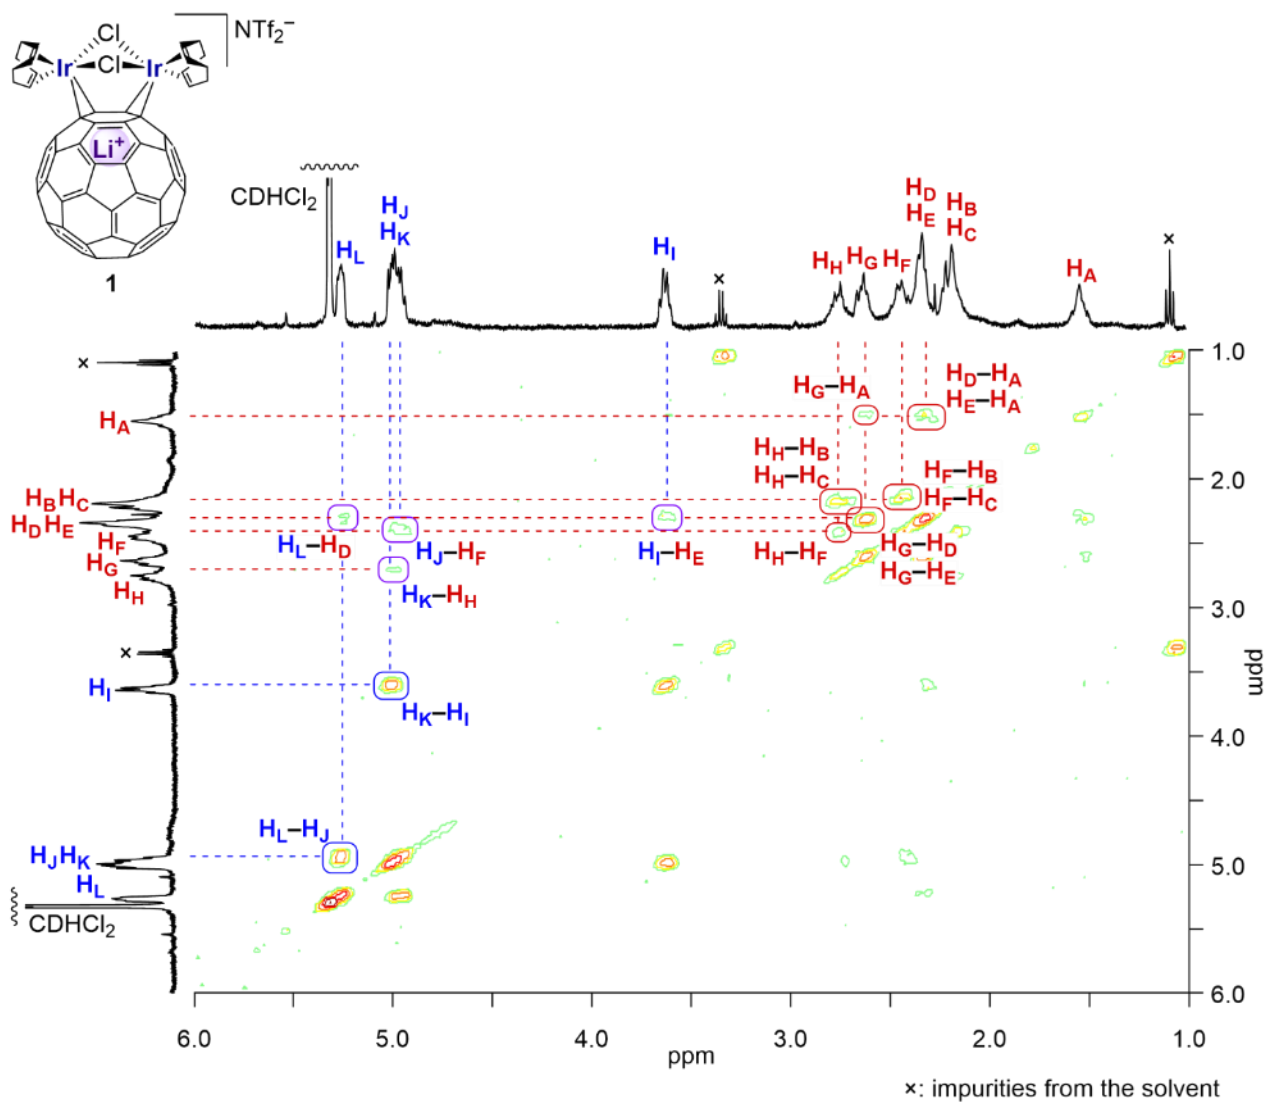

Fig. S10 <sup>1</sup>H-<sup>1</sup>H COSY spectrum of **1** in CD<sub>2</sub>Cl<sub>2</sub> (200 K).

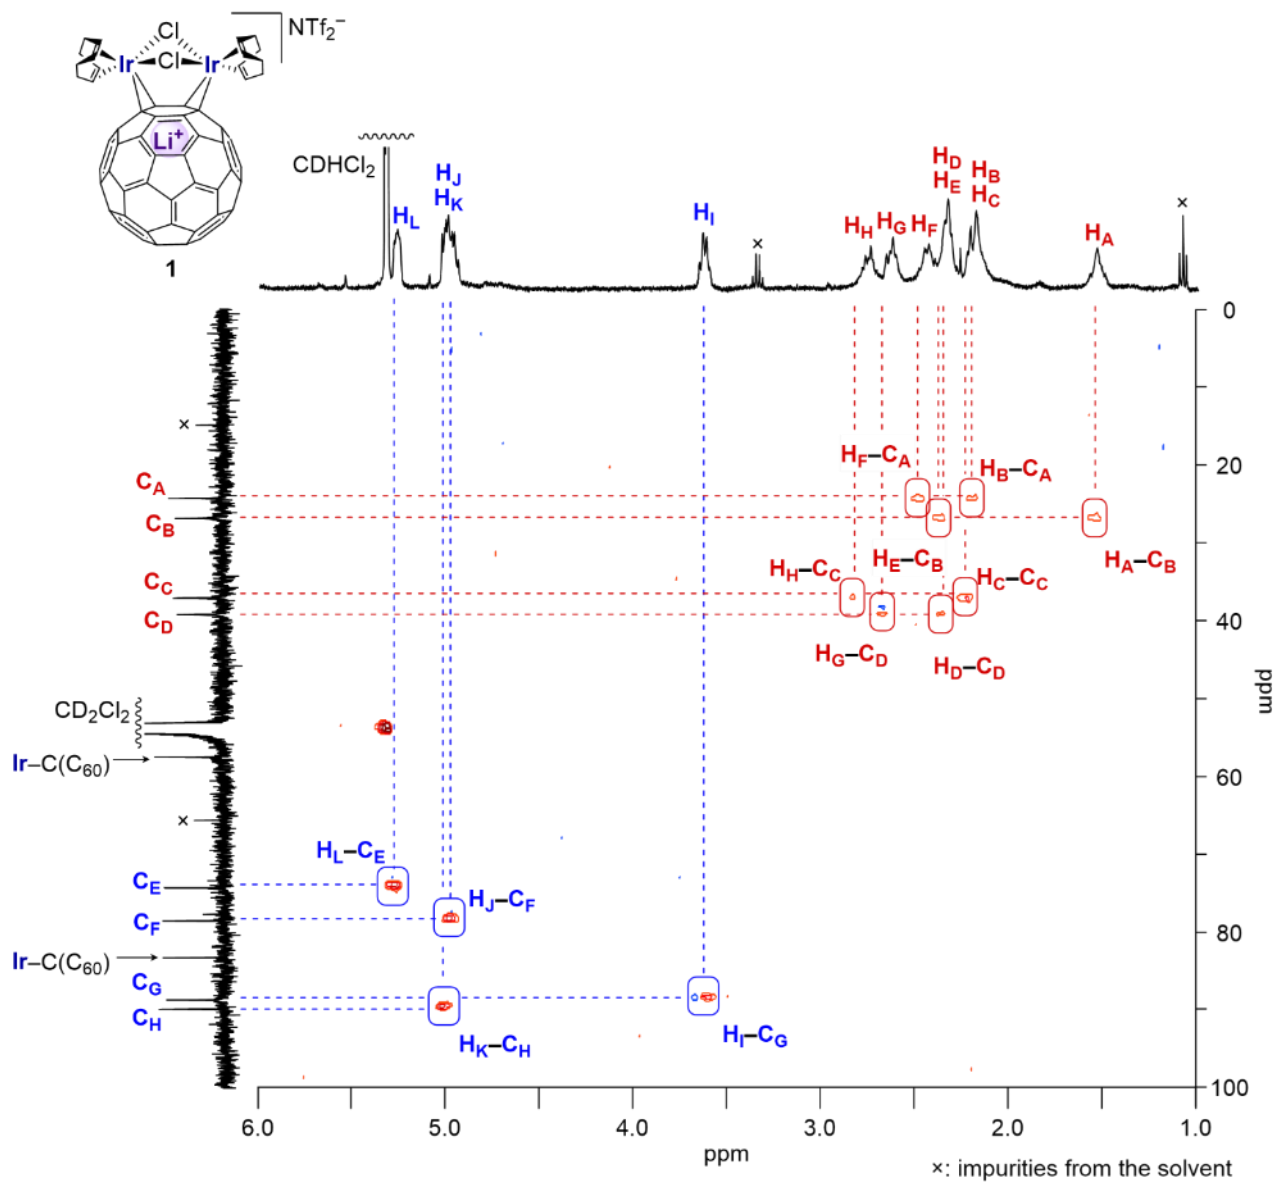

Fig. S11 <sup>1</sup>H-<sup>13</sup>C HSQC spectrum of **1** in CD<sub>2</sub>Cl<sub>2</sub> (200 K).

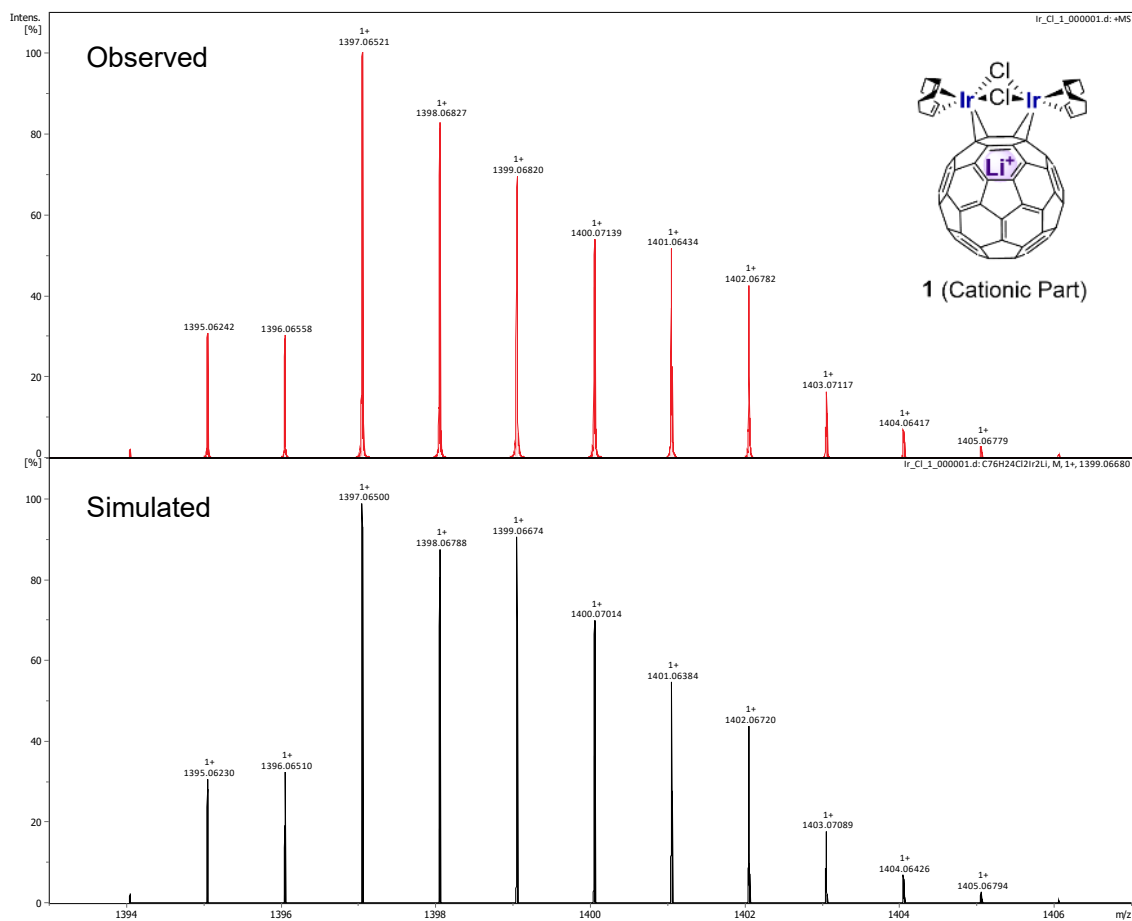

**Fig. S12** HRMS (ESI) spectrum of **1** (upper) and the calculated distribution pattern of the cationic part  $[C_7H_2LiCl_2Ir_2]^+$  (lower).

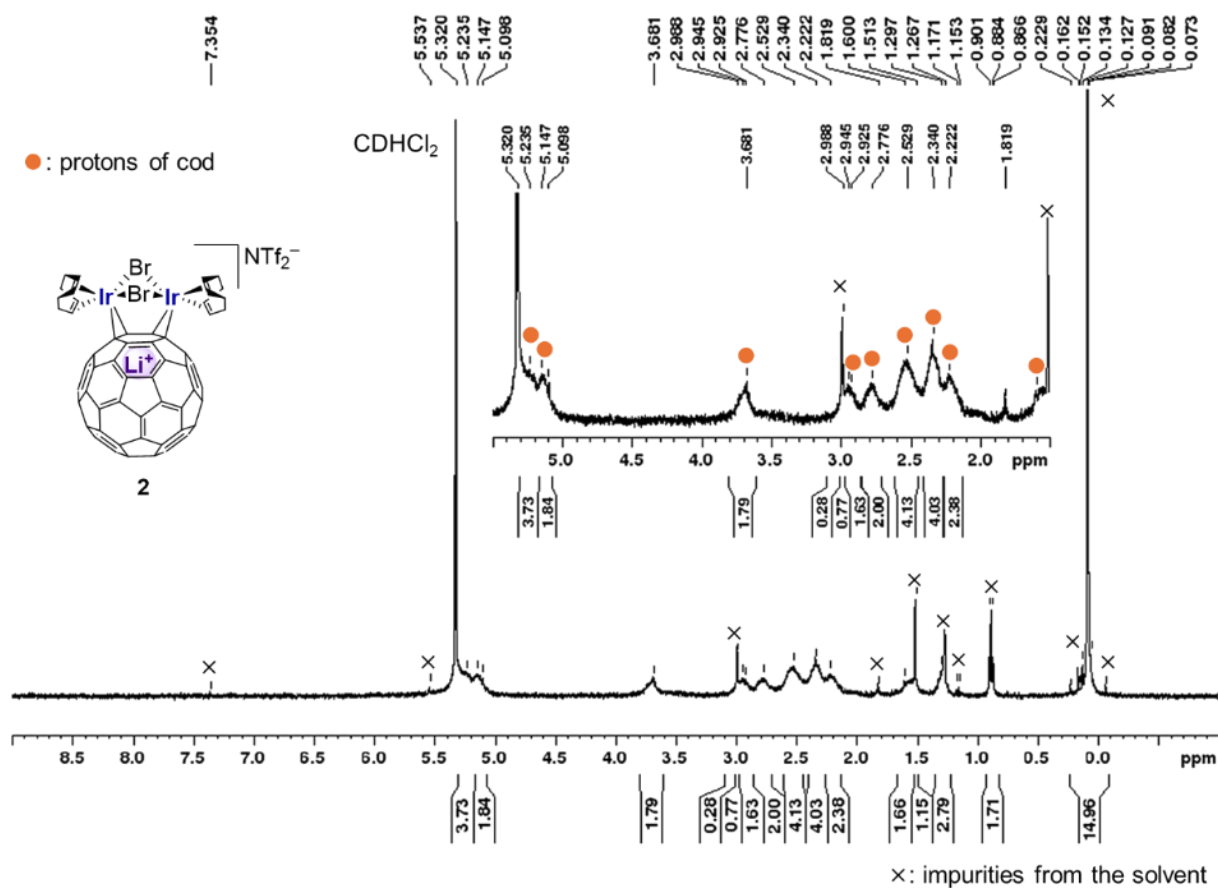

Fig. S13  $^1\text{H}$  NMR spectrum of  $[\{\mu\text{-}\eta^2\text{-}\eta^2\text{-}(\text{Li}^+\text{@C}_{60})\}\{\text{Ir}_2\text{Br}_2(\text{cod})_2\}]$  (**2**) (CD<sub>2</sub>Cl<sub>2</sub>, 400 MHz, r.t.).

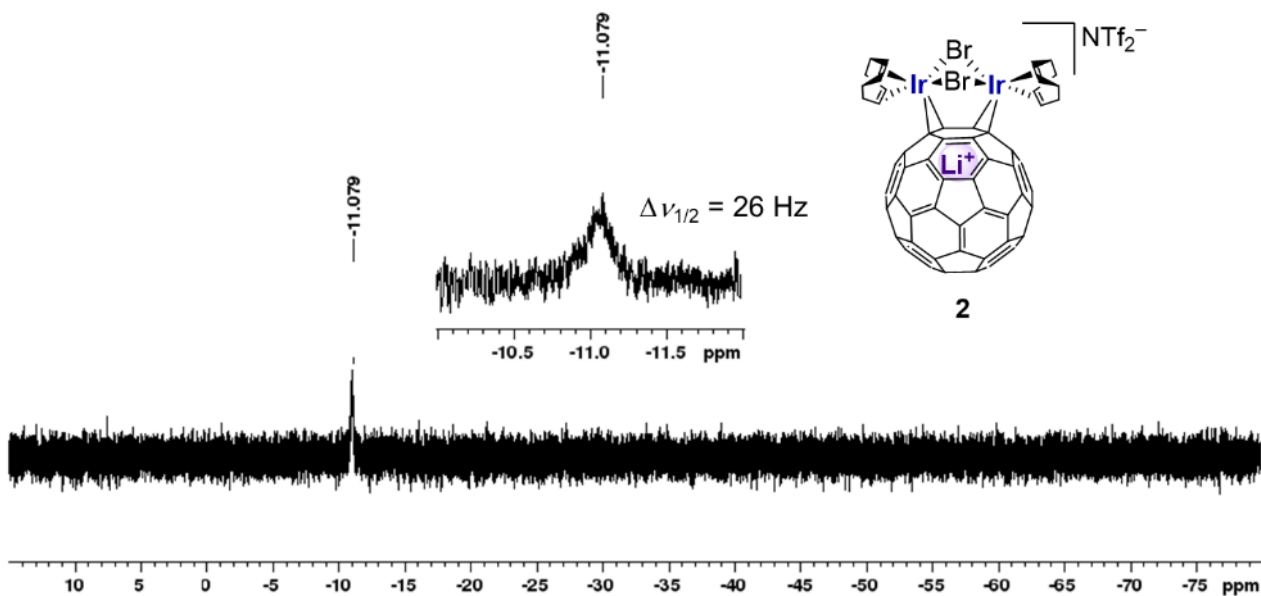

Fig. S14  $^7\text{Li}$  NMR spectrum of **2** (CD<sub>2</sub>Cl<sub>2</sub>, 156 MHz, r.t.).

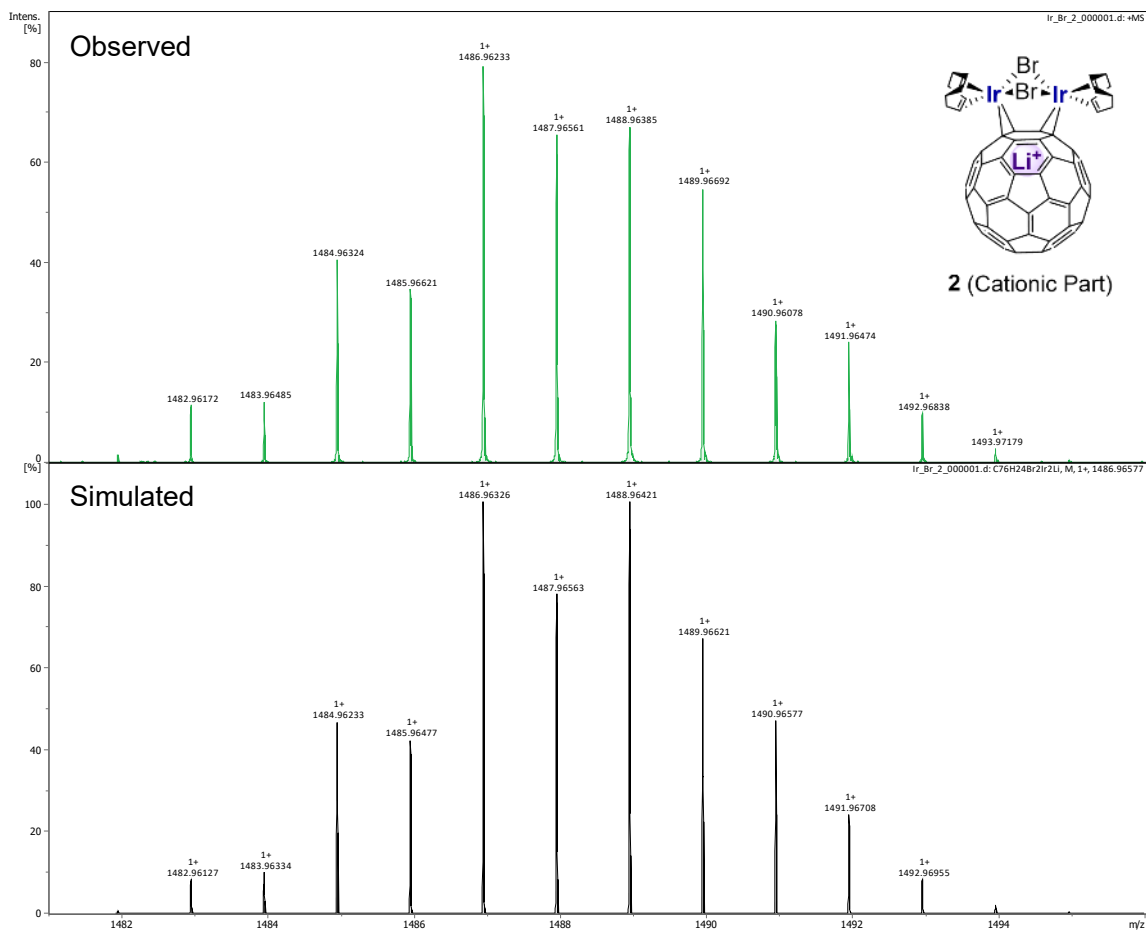

**Fig. S15** HRMS (ESI) spectrum of **2** (upper) and the calculated distribution pattern of the cationic part  $[C_{76}H_{24}LiBr_2Ir_2]^+$  (lower).

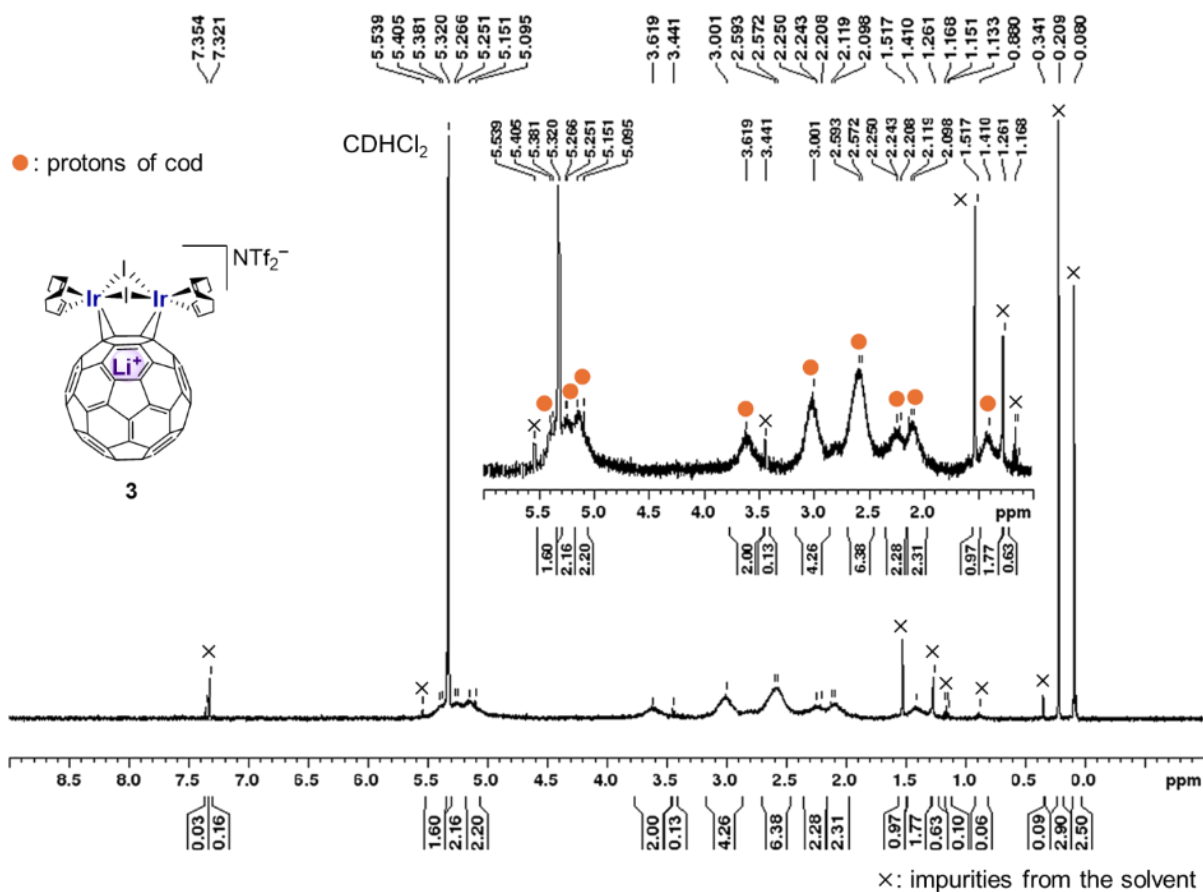

Fig. S16 <sup>1</sup>H NMR spectrum of  $[\{\mu\text{-}\eta^2\text{:}\eta^2\text{-Li}^+\text{@C}_{60}\}\{\text{Ir}_2\text{I}_2(\text{cod})_2\}]$  (**3**) (CD<sub>2</sub>Cl<sub>2</sub>, 400 MHz, r.t.).

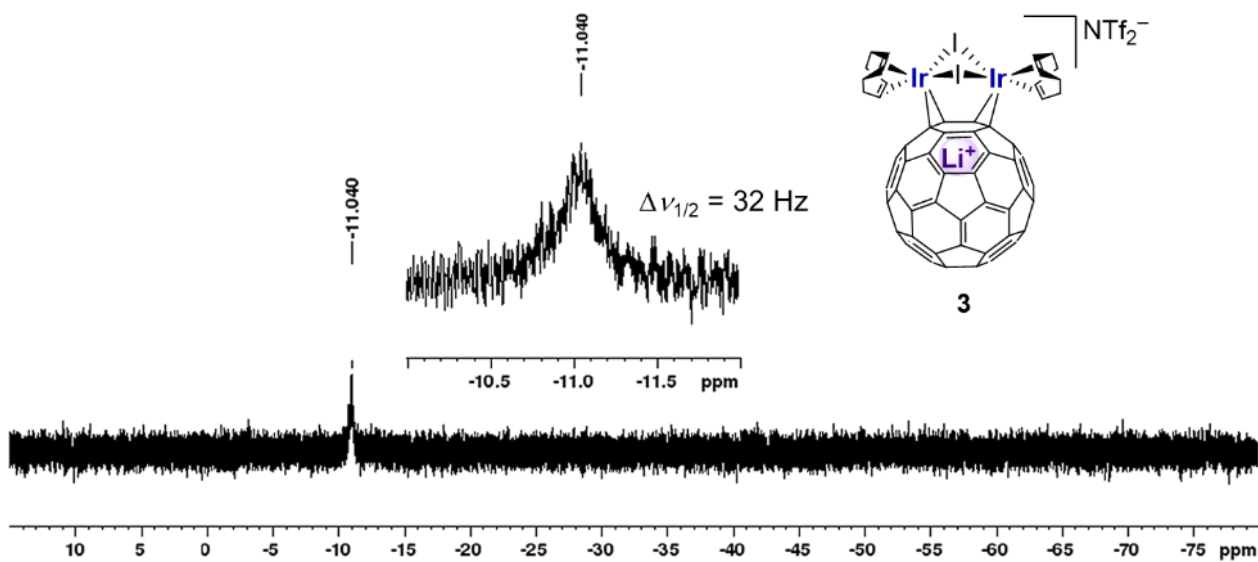

Fig. S17 <sup>7</sup>Li NMR spectrum of **3** (CD<sub>2</sub>Cl<sub>2</sub>, 156 MHz, r.t.).

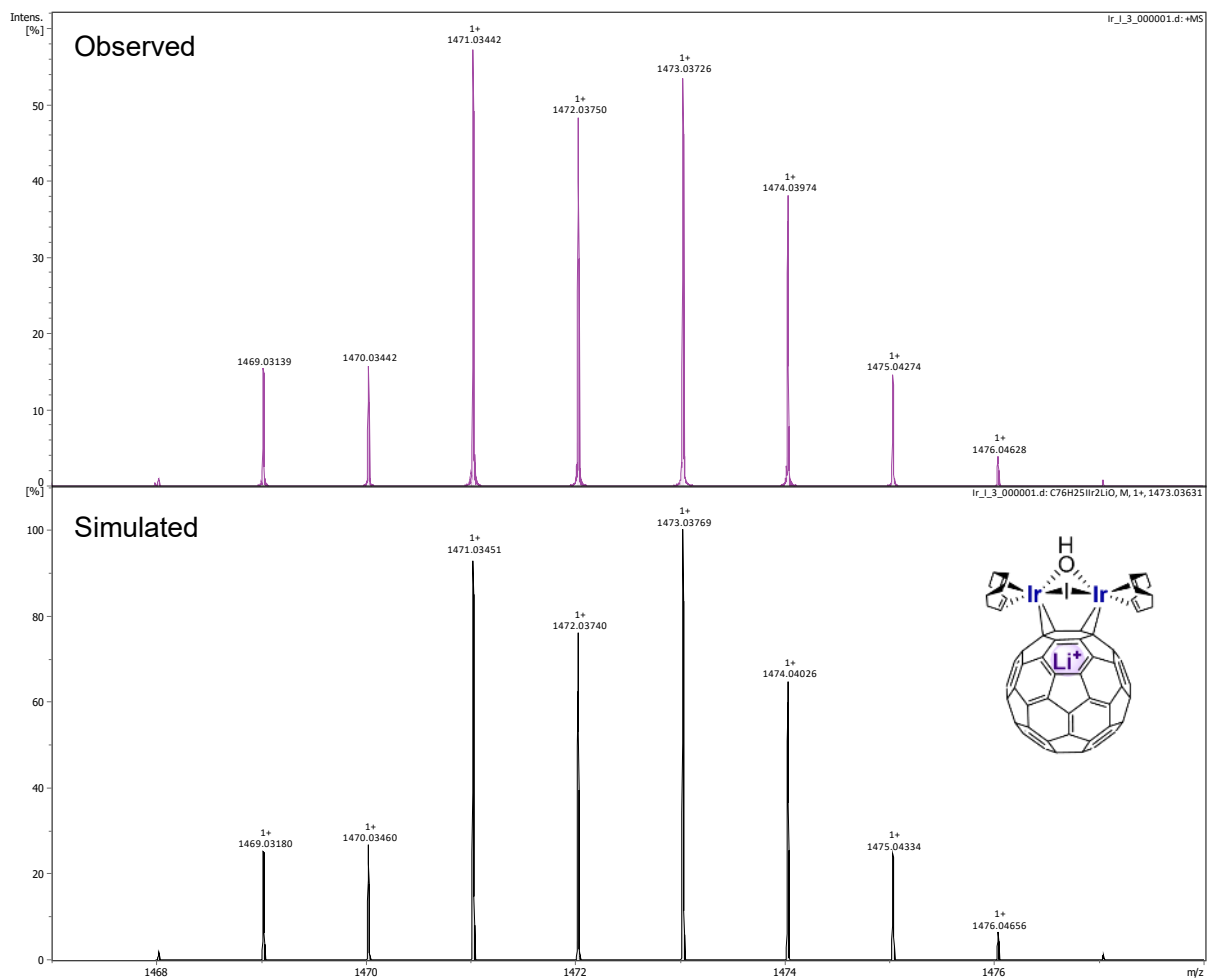

**Fig. S18** HRMS (ESI) spectrum obtained from a solution of **3** (upper) and the calculated distribution pattern of the cation  $[(\text{Li}^+@C_{60})\{\text{Ir}_2\text{I}(\text{OH})(\text{cod})_2\}]^+$  ( $[\text{C}_{76}\text{H}_{25}\text{LiOIr}_2]^+$ ) (lower).

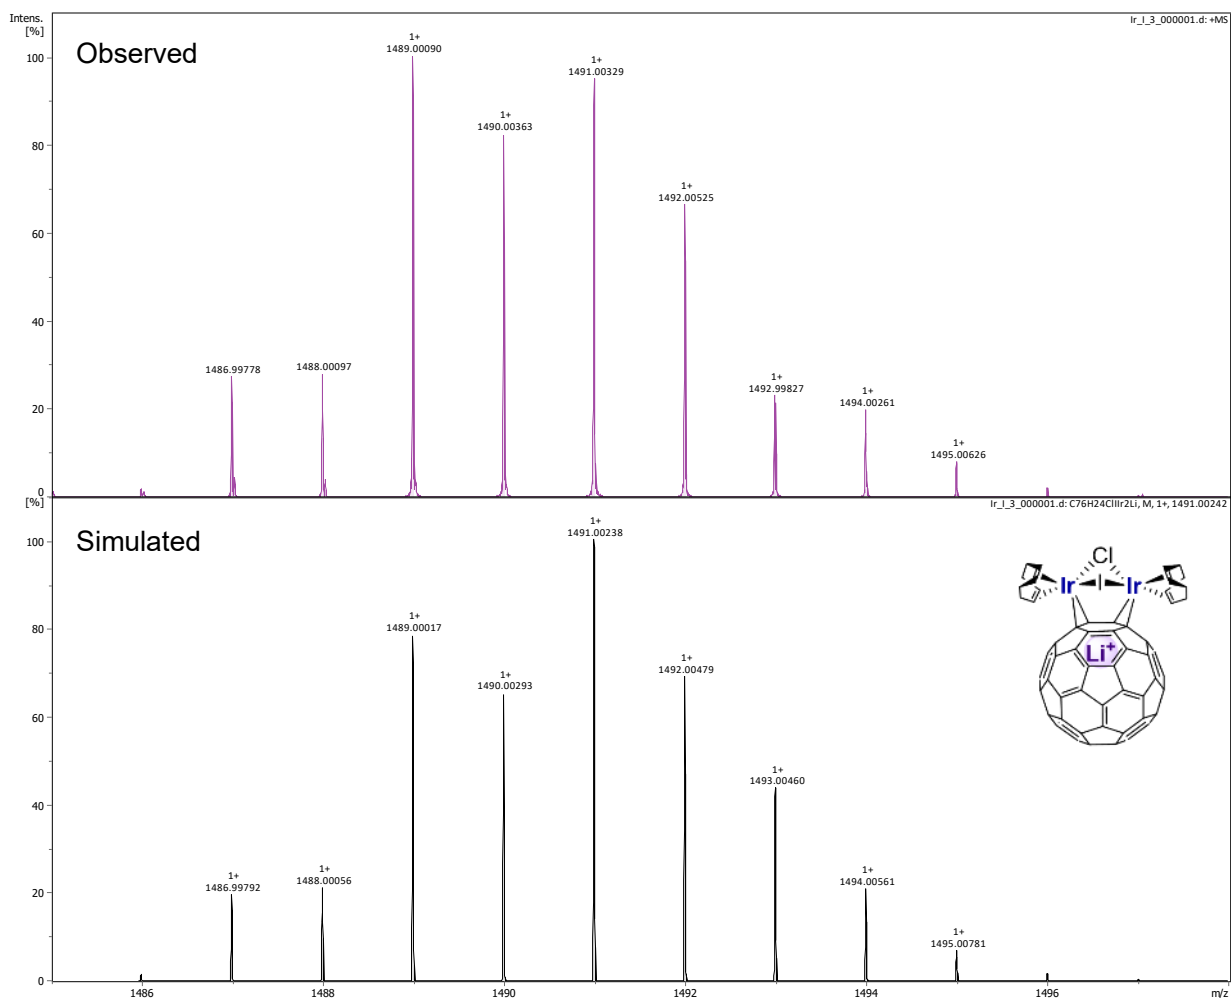

**Fig. S19** HRMS (ESI) spectrum obtained from a solution of **3** (upper) and the calculated distribution pattern of the cation  $[(Li^+@C_{60})\{Ir_2ICl(cod)_2\}]^+$  ( $[C_{76}H_{24}LiIClIr_2]^+$ ) (lower).



#### 4. UV/Vis spectra of complexes 1–3

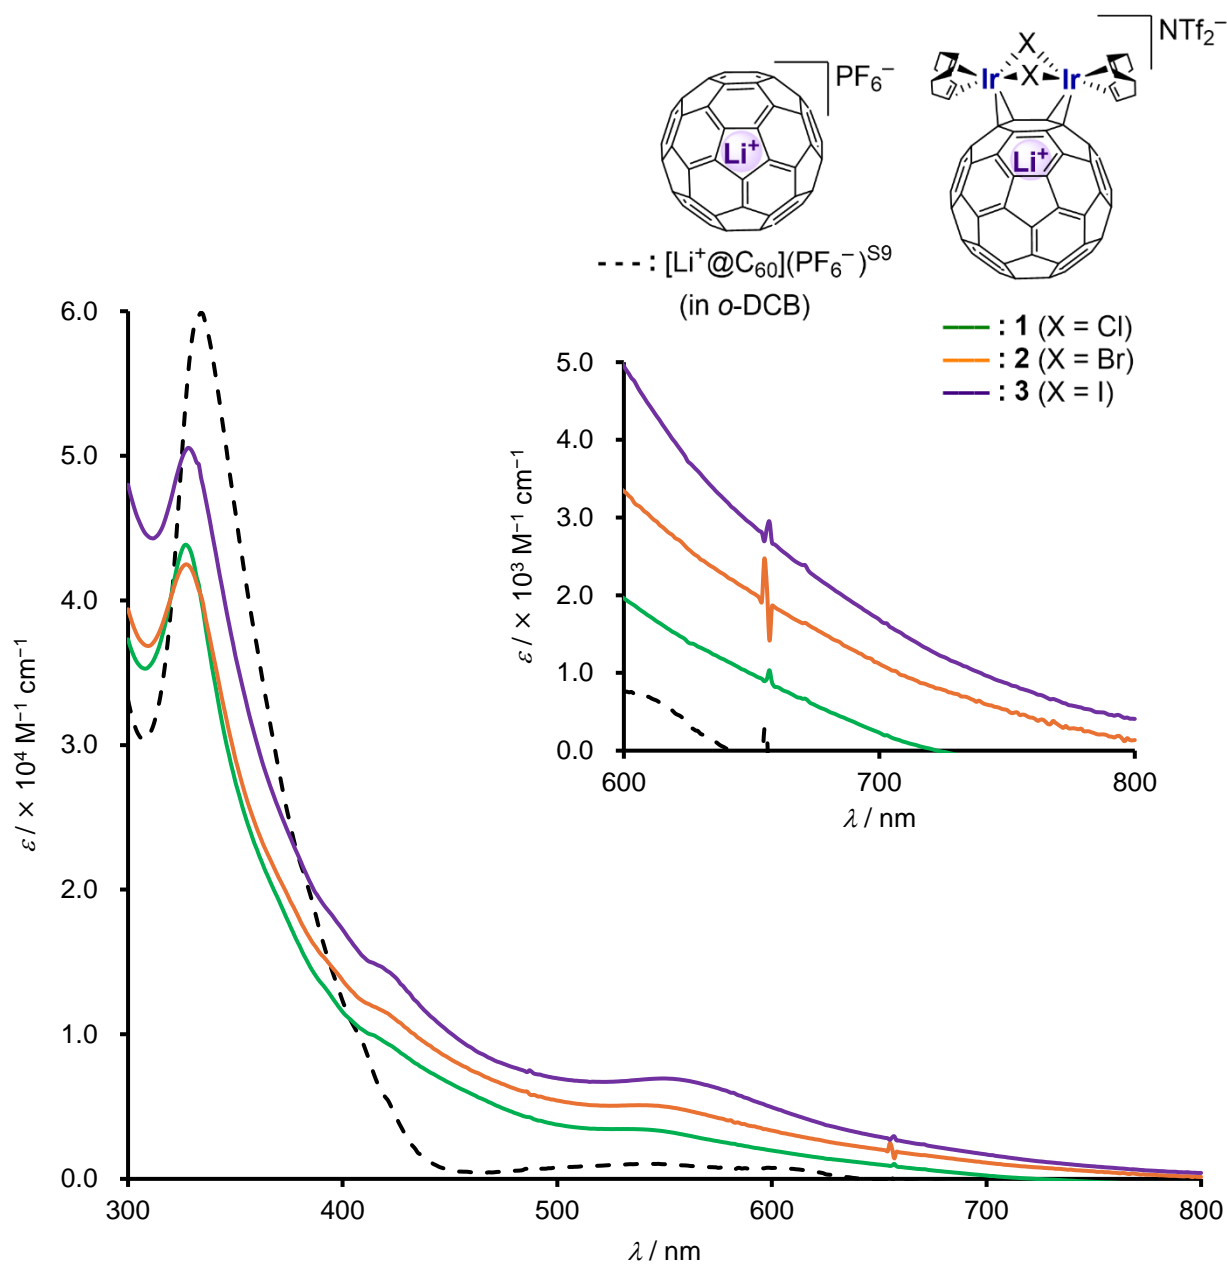

**Fig. S20** UV/Vis absorption spectra of complexes 1–3 in  $\text{CH}_2\text{Cl}_2$  at room temperature ( $1.0 \times 10^{-4} \text{ M}$ , 1 mm quartz cell). The corresponding spectrum of  $[\text{Li}^+@C_{60}](\text{PF}_6^-)^{S9}$  in *o*-DCB is also shown as a reference.

## 5. Electrochemistry of complexes 1–3 and Ir<sub>2</sub>X<sub>2</sub>(cod)<sub>2</sub>

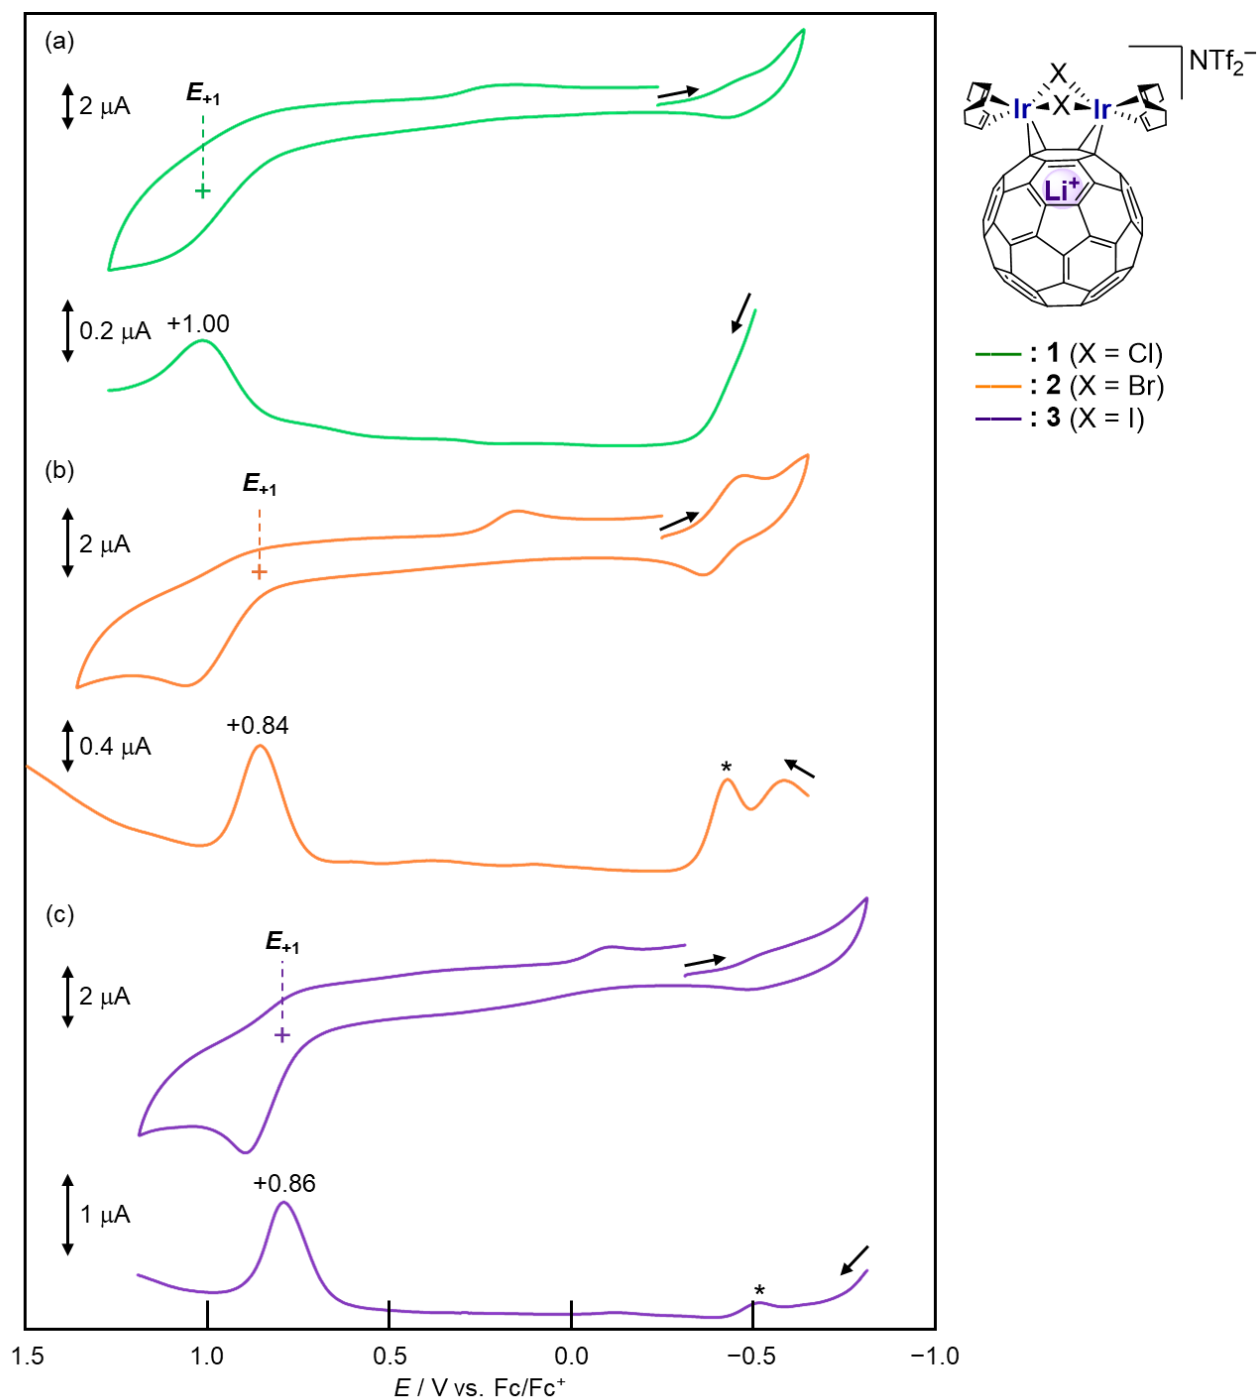

**Fig. S21** Cyclic and differential pulse voltammograms (CV and DPV) of complexes (a) **1**, (b) **2** and (c) **3** in *o*-DCB with 200 mM (for **1**) or 100 mM (for **2** and **3**) [<sup>n</sup>Bu<sub>4</sub>N<sup>+</sup>](NTf<sub>2</sub><sup>-</sup>) as the electrolyte at the scan rate of 50 mV·s<sup>-1</sup> (oxidation side, \*: waves of free Li<sup>+</sup>@C<sub>60</sub> formed from **1–3** in the measurements). Plus signs (+) indicate half-wave potentials. All potentials are referenced against the ferrocene/ferrocenium (Fc/Fc<sup>+</sup>) couple.

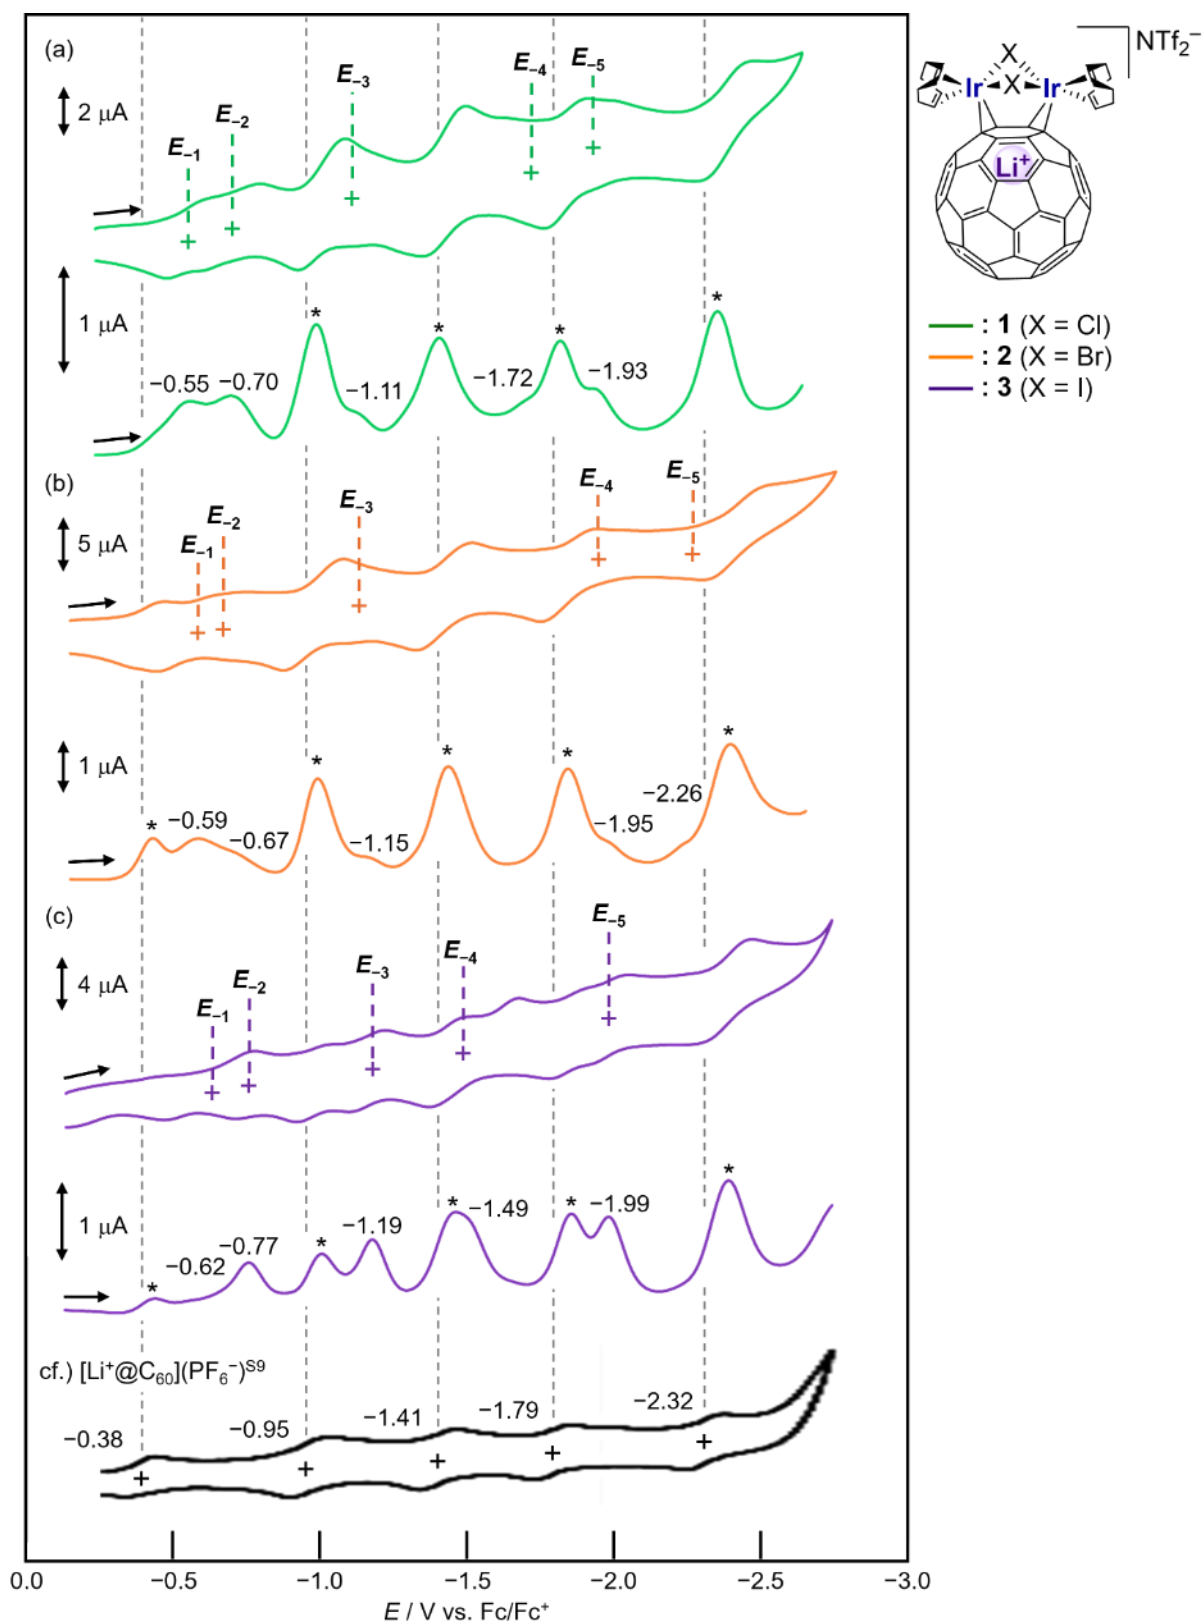

**Fig. S22** CV and DPV of complexes (a) **1**, (b) **2** and (c) **3** in *o*-DCB with 200 mM (for **1**) or 100 mM (for **2** and **3**)  $[\text{Bu}_4\text{N}^+](\text{NTf}_2^-)$  as the electrolyte at the scan rate of  $50 \text{ mV} \cdot \text{s}^{-1}$  (reduction side, \*: waves of free  $\text{Li}^+@C_{60}$  formed from **1–3** in the measurements). Plus signs (+) indicate half-wave potentials. All potentials are referenced against the ferrocene/ferrocenium ( $\text{Fc}/\text{Fc}^+$ ) couple. CV of  $[\text{Li}^+@C_{60}](\text{PF}_6^-)^{S9}$  is shown at the bottom for a reference.

**Table S3** The oxidation and reduction potentials of complexes **1–3**, [Li<sup>+</sup>@C<sub>60</sub>](PF<sub>6</sub><sup>-</sup>)<sup>S9</sup> and Ir<sub>2</sub>X<sub>2</sub>(cod)<sub>2</sub> (X = Cl, Br and I). All potentials were determined by the measurement of DPV (\*: observed as shoulder peaks).

|                                                    | <i>E</i> <sub>-5</sub> | <i>E</i> <sub>-4</sub> | <i>E</i> <sub>-3</sub> | <i>E</i> <sub>-2</sub> | <i>E</i> <sub>-1</sub> | <i>E</i> <sub>+1</sub> | <i>E</i> <sub>+2</sub> | <i>E</i> <sub>+3</sub> |
|----------------------------------------------------|------------------------|------------------------|------------------------|------------------------|------------------------|------------------------|------------------------|------------------------|
| <b>1</b>                                           | -1.93*                 | -1.72*                 | -1.11*                 | -0.70                  | -0.55                  | +1.00                  | –                      | –                      |
| <b>2</b>                                           | -2.26*                 | -1.95*                 | -1.15*                 | -0.67*                 | -0.59                  | +0.84                  | –                      | –                      |
| <b>3</b>                                           | -1.99                  | -1.49*                 | -1.19                  | -0.77                  | -0.62*                 | +0.86                  | –                      | –                      |
| Li <sup>+</sup> @C <sub>60</sub> <sup>S9</sup>     | -2.32                  | -1.79                  | -1.41                  | -0.95                  | -0.38                  | –                      | –                      | –                      |
| Ir <sub>2</sub> Cl <sub>2</sub> (cod) <sub>2</sub> | –                      | –                      | -2.07                  | -1.60                  | -1.20                  | -0.02                  | +0.26                  | +0.70                  |
| Ir <sub>2</sub> Br <sub>2</sub> (cod) <sub>2</sub> | –                      | -2.48                  | -2.36                  | -1.30                  | -1.08                  | +0.03                  | +0.28                  | +0.74                  |
| Ir <sub>2</sub> I <sub>2</sub> (cod) <sub>2</sub>  | –                      | -2.28                  | -1.65                  | -1.36                  | -0.93                  | +0.10                  | +0.45                  | +0.64                  |

## 6. DFT calculations

Theoretical calculations were carried out for the cationic parts of **1–3** using the Gaussian 16 rev C.02 program package.<sup>S10</sup> All geometries were optimised by the DFT method at the B3PW91<sup>S11–S13</sup> level. Initial structures for optimisation were taken from the XRD structures. The 6-31G(d)<sup>S14–S16</sup> basis set was employed for H, Li, C, Cl and Br atoms, and Lan12DZ<sup>S17</sup> basis set for Ir and I atoms. Natural bond orbital (NBO) population analysis was carried out to calculate Wiberg bond indices<sup>S18</sup> (WBI) and Natural population analysis (NPA) charges<sup>S19</sup> using the NBO 7.0 program<sup>S20</sup> at the B3PW91 level: The 6-311+G(d,p)<sup>S14–S16,S21</sup> basis set was used for H, Li, C, Cl and Br atoms, and the SDD<sup>S21</sup> basis set for Ir and I atoms using Grimme's D3 dispersion force model<sup>S23</sup> for empirical dispersion force correction in the gas phase. For the calculations of single-point energy and NMR spectra and chemical shift values using the GIAO method,<sup>S24</sup> the same functional and basis set for the NBO analysis were used. The <sup>1</sup>H and <sup>13</sup>C chemical shifts are referenced to SiMe<sub>4</sub>, where shielding tensors were calculated at the B3PW91-D3/6-311+G(d,p) level of theory. TD-DFT calculations were performed at the B3PW91 level: The 6-31+G(d,p) basis set was used for H, Li, C, Cl and Br atoms, and the def2-TZVP<sup>S25,S26</sup> basis set for Ir and I atoms. For the NMR and TD-DFT calculations, the solvent effect of CH<sub>2</sub>Cl<sub>2</sub> was considered using the SMD model.<sup>S27</sup> Optimised structures, **1-opt**, **2-opt** and **3-opt** are illustrated in Figs. S23, S24 and S25, respectively.

6-1. Optimised structures of the cation parts of complexes 1–3: 1-opt, 2-opt and 3-opt

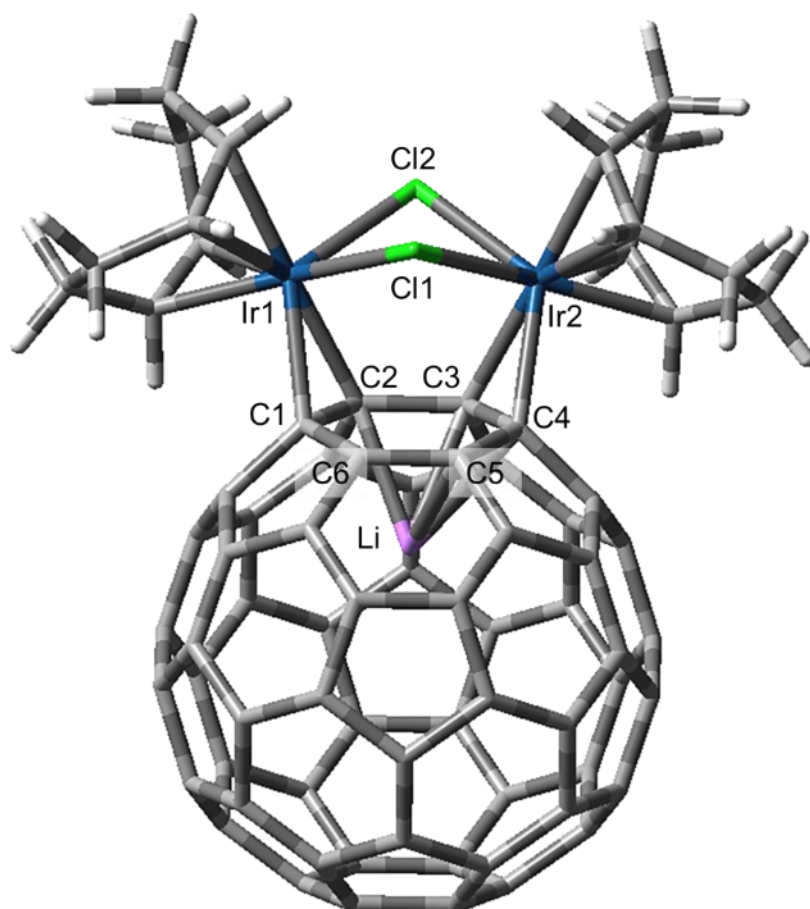

Fig. S23 Optimised structure of **1-opt**.

**Table S4** Selected bond distances (Å) and angles (°) of **1-opt** and the crystal structure of **1**

|         | X-ray      | Calcd. |                                      | X-ray           | Calcd. |
|---------|------------|--------|--------------------------------------|-----------------|--------|
| Ir1–Cl1 | 2.4025(9)  | 2.451  | Li <sub>A</sub> /Li <sub>B</sub> –C1 | 2.69(7)/2.34(4) | 2.398  |
| Ir1–Cl2 | 2.5395(9)  | 2.592  | Li <sub>A</sub> /Li <sub>B</sub> –C2 | 2.46(6)/2.22(4) | 2.238  |
| Ir2–Cl1 | 2.3955(9)  | 2.451  | Li <sub>A</sub> /Li <sub>B</sub> –C3 | 2.22(3)/2.33(6) | 2.238  |
| Ir2–Cl2 | 2.5471(10) | 2.592  | Li <sub>A</sub> /Li <sub>B</sub> –C4 | 2.25(3)/2.56(7) | 2.398  |
| Ir1–C1  | 2.170(4)   | 2.191  | Li <sub>A</sub> /Li <sub>B</sub> –C5 | 2.34(3)/2.50(5) | 2.391  |
| Ir1–C2  | 2.162(4)   | 2.176  | Li <sub>A</sub> /Li <sub>B</sub> –C6 | 2.55(5)/2.40(4) | 2.391  |
| Ir2–C3  | 2.169(4)   | 2.176  | Ir1–Cl1–Ir2                          | 92.12(3)        | 91.91  |
| Ir2–C4  | 2.170(4)   | 2.191  | Ir1–Cl2–Ir2                          | 85.56(3)        | 85.65  |
| C1–C2   | 1.488(5)   | 1.499  | Cl1–Ir1–Cl2                          | 78.30(3)        | 78.37  |
| C2–C3   | 1.531(5)   | 1.538  | Cl1–Ir2–Cl2                          | 78.27(3)        | 78.37  |
| C3–C4   | 1.499(5)   | 1.499  |                                      |                 |        |
| C4–C5   | 1.497(5)   | 1.502  |                                      |                 |        |
| C5–C6   | 1.385(5)   | 1.391  |                                      |                 |        |
| C6–C1   | 1.499(5)   | 1.502  |                                      |                 |        |

**Table S5** Optimised atomic coordinates of **1-opt**

| Symbol | x          | y          | z          |
|--------|------------|------------|------------|
| Ir     | 0.0142761  | -0.0376930 | -0.0380126 |
| Ir     | 0.0216277  | -0.0349871 | 3.4854998  |
| Li     | -1.0578226 | -3.7108068 | 1.7287602  |
| Cl     | 1.7218629  | -0.0364009 | 1.7201597  |
| Cl     | -1.0519003 | 1.5347145  | 1.7247590  |
| C      | 0.0378220  | -2.2141348 | 0.2096216  |
| C      | -1.1117638 | -1.6105280 | 0.9584572  |
| C      | -1.1085637 | -1.6093527 | 2.4961011  |
| C      | 0.0441261  | -2.2118201 | 3.2410653  |
| C      | 1.0881589  | -2.9126611 | 2.4191837  |
| C      | 1.0852570  | -2.9137289 | 1.0282375  |
| C      | 1.6490905  | 0.3221707  | -1.4128694 |
| C      | 1.1201936  | 1.5695734  | -0.9622585 |
| C      | 0.2608515  | 2.4948355  | -1.8147824 |
| C      | -1.2408806 | 2.2358681  | -1.6086698 |
| C      | -1.5510106 | 0.7902391  | -1.2940620 |
| C      | -0.9939272 | -0.3156708 | -1.9698289 |
| C      | -0.0725385 | -0.2232628 | -3.1768656 |
| C      | 1.4061829  | -0.2796232 | -2.7766891 |
| C      | 1.1314970  | 1.5736731  | 4.4026062  |
| C      | 1.6623129  | 0.3269466  | 4.8528365  |
| C      | 1.4251802  | -0.2729577 | 6.2184928  |
| C      | -0.0517602 | -0.2156887 | 6.6249827  |
| C      | -0.9783037 | -0.3100013 | 5.4220586  |
| C      | -1.5382810 | 0.7948401  | 4.7469365  |
| C      | -1.2268375 | 2.2409619  | 5.0579705  |
| C      | 0.2757571  | 2.5002778  | 5.2572957  |
| C      | -0.2593050 | -3.1884889 | -0.8715289 |
| C      | -1.5553270 | -3.4642992 | -1.2855325 |
| C      | -2.6866154 | -2.9007422 | -0.5507956 |
| C      | -2.4599712 | -2.0910566 | 0.5614747  |
| C      | -3.2803352 | -2.2871146 | 1.7323131  |
| C      | -2.4551032 | -2.0892658 | 2.8994291  |
| C      | -2.6771230 | -2.8972341 | 4.0138804  |
| C      | -1.5427839 | -3.4596720 | 4.7447671  |
| C      | -0.2484976 | -3.1845120 | 4.3249378  |
| C      | 0.7144369  | -4.2567935 | 4.3029154  |
| C      | 1.5386006  | -4.0901569 | 3.1260586  |
| C      | 2.0070568  | -5.2145950 | 2.4428933  |
| C      | 2.0040530  | -5.2156972 | 1.0042373  |
| C      | 1.5327555  | -4.0923079 | 0.3213064  |
| C      | 0.7037137  | -4.2607409 | -0.8518631 |
| C      | 0.3650427  | -5.5421522 | -1.2927473 |
| C      | -0.9795826 | -5.8121850 | -1.7433898 |
| C      | -1.9256751 | -4.7862022 | -1.7311370 |
| C      | -3.2765499 | -5.0494457 | -1.2813751 |
| C      | -3.7429260 | -3.8861910 | -0.5522438 |
| C      | -4.5578825 | -4.0459834 | 0.5675879  |
| C      | -4.3187130 | -3.2327450 | 1.7351936  |
| C      | -4.5530093 | -4.0441946 | 2.9050256  |
| C      | -3.7333953 | -3.8826908 | 4.0212036  |
| C      | -3.2639968 | -5.0448251 | 4.7501765  |
| C      | -1.9112697 | -4.7808991 | 5.1939205  |
| C      | -0.9651357 | -5.8068680 | 5.2037904  |
| C      | 0.3776023  | -5.5375277 | 4.7471539  |
| C      | 0.8513294  | -6.7032120 | 4.0255143  |
| C      | 1.6526681  | -6.5446585 | 2.8974329  |
| C      | 1.4276703  | -7.3684043 | 1.7264112  |
| C      | 1.6477771  | -6.5464463 | 0.5532098  |
| C      | 0.8417710  | -6.7067309 | -0.5712977 |
| C      | -0.2171699 | -7.6938025 | -0.5717803 |
| C      | -1.3456651 | -7.1386916 | -1.2958226 |
| C      | -2.6450884 | -7.3908210 | -0.8583601 |
| C      | -3.6301947 | -6.3266772 | -0.8540160 |
| C      | -4.4690067 | -6.4931286 | 0.3182602  |
| C      | -4.9263316 | -5.3743776 | 1.0132452  |
| C      | -4.9233038 | -5.3732645 | 2.4629389  |
| C      | -4.4630942 | -6.4909475 | 3.1577268  |
| C      | -3.6194219 | -6.3227102 | 4.3262569  |
| C      | -2.6343056 | -7.3868515 | 4.3281271  |
| C      | -1.3330736 | -7.1340545 | 4.7597837  |
| C      | -0.2075971 | -7.6902749 | 4.0319075  |
| C      | -0.4297293 | -8.4777364 | 2.9035965  |
| C      | 0.4040435  | -8.3149674 | 1.7292627  |
| C      | -0.4346071 | -8.4795240 | 0.5586568  |
| C      | -1.7863613 | -8.7430917 | 1.0096701  |
| C      | -2.8698646 | -8.2091664 | 0.3146093  |
| C      | -3.9961918 | -7.6540158 | 1.0407332  |
| C      | -3.9932851 | -7.6529405 | 2.4350753  |
| C      | -2.8639542 | -8.2069952 | 3.1573629  |
| C      | -1.7833493 | -8.7419906 | 2.4586163  |
| H      | 2.5728980  | -0.0087184 | -0.9370655 |
| H      | 1.6833343  | 2.0633448  | -0.1717560 |
| H      | 0.4839579  | 3.5309940  | -1.5426402 |
| H      | 0.5389290  | 2.3979650  | -2.8695234 |
| H      | -1.6046218 | 2.8454444  | -0.7759306 |
| H      | -1.8253149 | 2.5392065  | -2.4906892 |
| H      | -2.4969627 | 0.6233216  | -0.7788542 |
| H      | -1.5797948 | -1.2250675 | -1.9184969 |
| H      | -0.3026581 | -1.0522301 | -3.8542549 |
| H      | -0.2974394 | 0.6915360  | -3.7339784 |
| H      | 2.0396590  | 0.2174828  | -3.5261802 |
| H      | 1.7335599  | -1.3246216 | -2.7451869 |
| H      | 1.6912474  | 2.0661971  | 3.6089251  |
| H      | 2.5840677  | -0.0046634 | 4.3735638  |
| H      | 1.7520779  | -1.3180992 | 6.1868647  |
| H      | 2.0620542  | 0.2249137  | 6.9645871  |
| H      | -0.2741183 | 0.7000765  | 7.1815226  |
| H      | -0.2790701 | -1.0434895 | 7.3047443  |
| H      | -1.5643302 | -1.2195068 | 5.3746249  |
| H      | -2.4864380 | 0.6271143  | 4.2360653  |
| H      | -1.5941267 | 2.8492286  | 4.2258292  |
| H      | -1.8075226 | 2.5456771  | 5.9419887  |
| H      | 0.4976828  | 3.5360005  | 4.9825421  |
| H      | 0.5583178  | 2.4051080  | 6.3109999  |

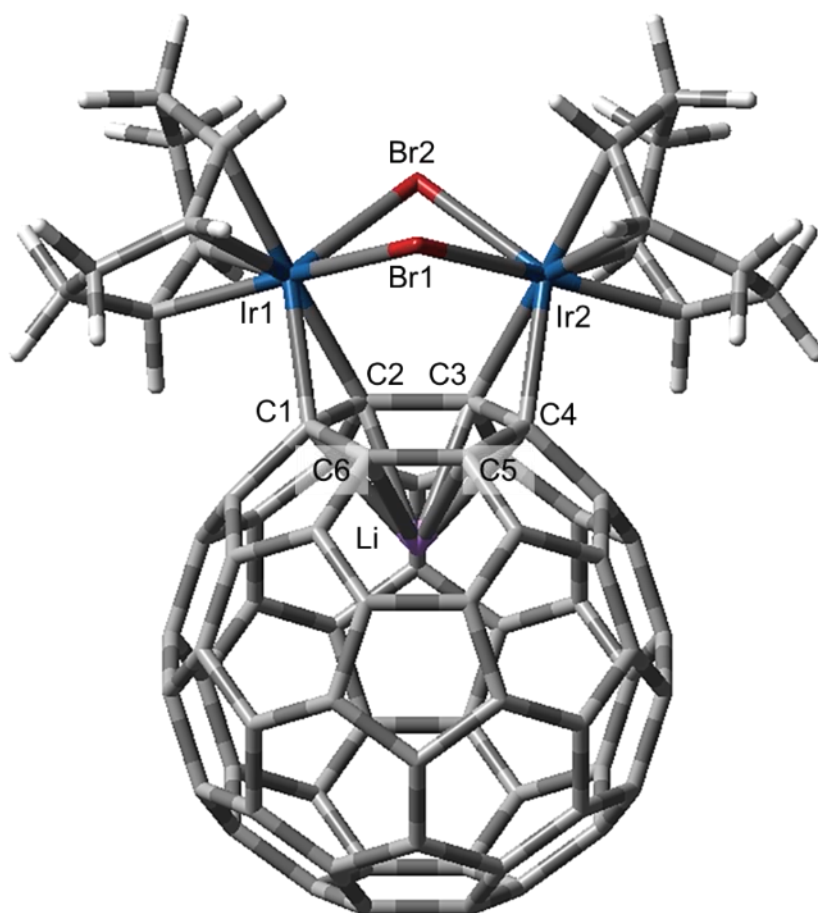

**Fig. S24** Optimised structure of **2-opt**.

**Table S6** Selected bond distances (Å) and angles (°) of **2-opt** and the crystal structure of **2**

|         | X-ray     | Calcd. |                                      | X-ray           | Calcd. |
|---------|-----------|--------|--------------------------------------|-----------------|--------|
| Ir1–Br1 | 2.5269(5) | 2.545  | Li <sub>A</sub> /Li <sub>B</sub> –C1 | 2.38(4)/2.81(9) | 2.395  |
| Ir1–Br2 | 2.6428(5) | 2.674  | Li <sub>A</sub> /Li <sub>B</sub> –C2 | 2.26(3)/2.52(8) | 2.244  |
| Ir2–Br1 | 2.5255(5) | 2.545  | Li <sub>A</sub> /Li <sub>B</sub> –C3 | 2.32(4)/2.23(5) | 2.244  |
| Ir2–Br2 | 2.6489(5) | 2.674  | Li <sub>A</sub> /Li <sub>B</sub> –C4 | 2.51(5)/2.28(5) | 2.395  |
| Ir1–C1  | 2.177(4)  | 2.200  | Li <sub>A</sub> /Li <sub>B</sub> –C5 | 2.45(4)/2.45(5) | 2.387  |
| Ir1–C2  | 2.164(4)  | 2.178  | Li <sub>A</sub> /Li <sub>B</sub> –C6 | 2.40(3)/2.68(8) | 2.388  |
| Ir2–C3  | 2.166(4)  | 2.178  | Ir1–Br1–Ir2                          | 89.012(17)      | 89.89  |
| Ir2–C4  | 2.169(4)  | 2.200  | Ir1–Br2–Ir2                          | 84.023(15)      | 84.49  |
| C1–C2   | 1.494(6)  | 1.500  | Br1–Ir1–Br2                          | 79.330(16)      | 79.37  |
| C2–C3   | 1.542(6)  | 1.543  | Br1–Ir2–Br2                          | 79.237(17)      | 79.37  |
| C3–C4   | 1.489(6)  | 1.500  |                                      |                 |        |
| C4–C5   | 1.510(6)  | 1.503  |                                      |                 |        |
| C5–C6   | 1.372(7)  | 1.391  |                                      |                 |        |
| C6–C1   | 1.502(7)  | 1.503  |                                      |                 |        |

**Table S7** Optimised atomic coordinates of **2-opt**

| Symbol | x          | y          | z          |
|--------|------------|------------|------------|
| Ir     | 0.0001386  | 0.0002182  | 0.0000809  |
| Ir     | 0.0000482  | 0.0001674  | 3.5955295  |
| Li     | 3.8240755  | -0.0000586 | 1.7980954  |
| Br     | -1.2542046 | 1.5315145  | 1.7977984  |
| Br     | -0.5270304 | -1.7222817 | 1.7977685  |
| C      | 2.0851506  | -0.6414326 | 0.2813309  |
| C      | 1.8141807  | 0.6321846  | 1.0262551  |
| C      | 1.8141323  | 0.6321698  | 2.5694569  |
| C      | 2.0850643  | -0.6414732 | 3.3143673  |
| C      | 2.4702662  | -1.8395451 | 2.4932812  |
| C      | 2.4703072  | -1.8395230 | 1.1024038  |
| C      | 0.5715929  | 0.8915885  | -1.9374453 |
| C      | -0.3311203 | 1.7460587  | -1.2731625 |
| C      | -1.8009428 | 1.8645525  | -1.6052017 |
| C      | -2.4808811 | 0.5001142  | -1.8080129 |
| C      | -1.8490133 | -0.5889540 | -0.9491938 |
| C      | -0.8058115 | -1.4585868 | -1.3915714 |
| C      | -0.1416451 | -1.4000754 | -2.7462244 |
| C      | 0.2303132  | 0.0322486  | -3.1449194 |
| C      | -0.3312908 | 1.7459693  | 4.8688090  |
| C      | 0.5714056  | 0.8914948  | 5.5331076  |
| C      | 0.2300842  | 0.0321152  | 6.7405411  |
| C      | -0.1418389 | -1.4002026 | 6.3417893  |
| C      | -0.8059425 | -1.4586852 | 4.9871043  |
| C      | -1.8491379 | -0.5890548 | 4.5447058  |
| C      | -2.4810552 | 0.4999790  | 5.4035323  |
| C      | -1.8011293 | 1.8644332  | 5.2007870  |
| C      | 3.1033176  | -0.6269531 | -0.7985473 |
| C      | 3.7247280  | 0.5415638  | -1.2169458 |
| C      | 3.4953851  | 1.7848473  | -0.4829001 |
| C      | 2.6544217  | 1.7925683  | 0.6292237  |
| C      | 3.0702612  | 2.5295753  | 1.7979079  |
| C      | 2.6543570  | 1.7925455  | 2.9665573  |
| C      | 3.4952711  | 1.7847947  | 4.0787204  |
| C      | 3.7245793  | 0.5414915  | 4.8127460  |
| C      | 3.1031872  | -0.6270173 | 4.3942915  |
| C      | 3.8676304  | -1.8485193 | 4.3743139  |
| C      | 3.4774154  | -2.5972048 | 3.1997924  |
| C      | 4.4289899  | -3.3586745 | 2.5169219  |
| C      | 4.4290256  | -3.3586566 | 1.0788212  |
| C      | 3.4774870  | -2.5971683 | 0.3959224  |
| C      | 3.8677577  | -1.8484558 | -0.7785628 |
| C      | 5.1920034  | -1.8770523 | -1.2219577 |
| C      | 5.8217347  | -0.6599895 | -1.6759514 |
| C      | 5.0962098  | 0.5324769  | -1.6645430 |
| C      | 5.7220189  | 1.7592664  | -1.2174624 |
| C      | 4.7332980  | 2.5290883  | -0.4880494 |
| C      | 5.1125400  | 3.2709082  | 0.6296112  |
| C      | 4.2660599  | 3.2669985  | 1.7979468  |
| C      | 5.1124828  | 3.2708800  | 2.9663248  |
| C      | 4.7331853  | 2.5290355  | 4.0839498  |
| C      | 5.7218700  | 1.7591955  | 4.8133932  |
| C      | 5.0960391  | 0.5323946  | 5.2604126  |
| C      | 5.8215628  | -0.6600726 | 5.2718273  |
| C      | 5.1918547  | -1.8771250 | 4.8177735  |
| C      | 6.1808355  | -2.6553634 | 4.0963814  |
| C      | 5.8058474  | -3.3837172 | 2.9699778  |
| C      | 6.6582806  | -3.3964298 | 1.7979261  |
| C      | 5.8059055  | -3.3836898 | 0.6258325  |
| C      | 6.1809482  | -2.6553074 | -0.5005341 |
| C      | 7.4214968  | -1.9092238 | -0.5037993 |
| C      | 7.1980348  | -0.6726916 | -1.2298838 |
| C      | 7.7991966  | 0.5077751  | -0.7953307 |
| C      | 7.0478202  | 1.7480038  | -0.7920923 |
| C      | 7.4402624  | 2.5105607  | 0.3784735  |
| C      | 6.4917675  | 3.2599565  | 1.0732407  |
| C      | 6.4917322  | 3.2599393  | 2.5227629  |
| C      | 7.4401925  | 2.5105268  | 3.2175595  |
| C      | 7.0476920  | 1.7479420  | 4.3880873  |
| C      | 7.7990680  | 0.5077128  | 4.3913329  |
| C      | 7.1978858  | -0.6727645 | 4.8258290  |
| C      | 7.4213835  | -1.9092795 | 4.0997261  |
| C      | 8.2381031  | -1.9145990 | 2.9703971  |
| C      | 7.8502980  | -2.6732889 | 1.7979647  |
| C      | 8.2381611  | -1.9145708 | 0.6255695  |
| C      | 8.8645735  | -0.6869576 | 1.0735611  |
| C      | 8.6491002  | 0.5004773  | 0.3765956  |
| C      | 8.4269700  | 1.7375981  | 1.1008051  |
| C      | 8.4269364  | 1.7375818  | 2.4952586  |
| C      | 8.6490308  | 0.5004435  | 3.2194494  |
| C      | 8.8645376  | -0.6869748 | 2.5224659  |
| H      | 1.6107131  | 1.1894600  | -1.8761634 |
| H      | 0.1002043  | 2.6104576  | -0.7684579 |
| H      | -1.9129572 | 2.5049508  | -2.4932757 |
| H      | -2.2898333 | 2.3964397  | -0.7830368 |
| H      | -2.4633707 | 0.2019806  | -2.8616056 |
| H      | -3.5389150 | 0.5864163  | -1.5419179 |
| H      | -2.4950831 | -0.9909377 | -0.1697951 |
| H      | -0.7703107 | -2.4428733 | -0.9231670 |
| H      | 0.7670280  | -2.0104704 | -2.6997520 |
| H      | -0.7874664 | -1.8691150 | -3.5034489 |
| H      | 1.0972039  | 0.0146748  | -3.8137394 |
| H      | -0.5764419 | 0.5078741  | -3.7114120 |
| H      | 0.1000432  | 2.6103866  | 4.3641440  |
| H      | 1.6105240  | 1.1893840  | 5.4718777  |
| H      | 1.0969454  | 0.0145330  | 7.4093990  |
| H      | -0.5767023 | 0.5077147  | 7.3070113  |
| H      | 0.7668430  | -2.0105863 | 6.2953424  |
| H      | -0.7876901 | -1.8692696 | 7.0989713  |
| H      | -0.7704068 | -2.4429584 | 4.5186743  |
| H      | -2.4951706 | -0.9910251 | 3.7652696  |
| H      | -2.4635795 | 0.2018148  | 6.4571172  |
| H      | -3.5390804 | 0.5862734  | 5.1373998  |
| H      | -1.9131908 | 2.5048049  | 6.0888742  |
| H      | -2.2899917 | 2.3963359  | 4.3786155  |



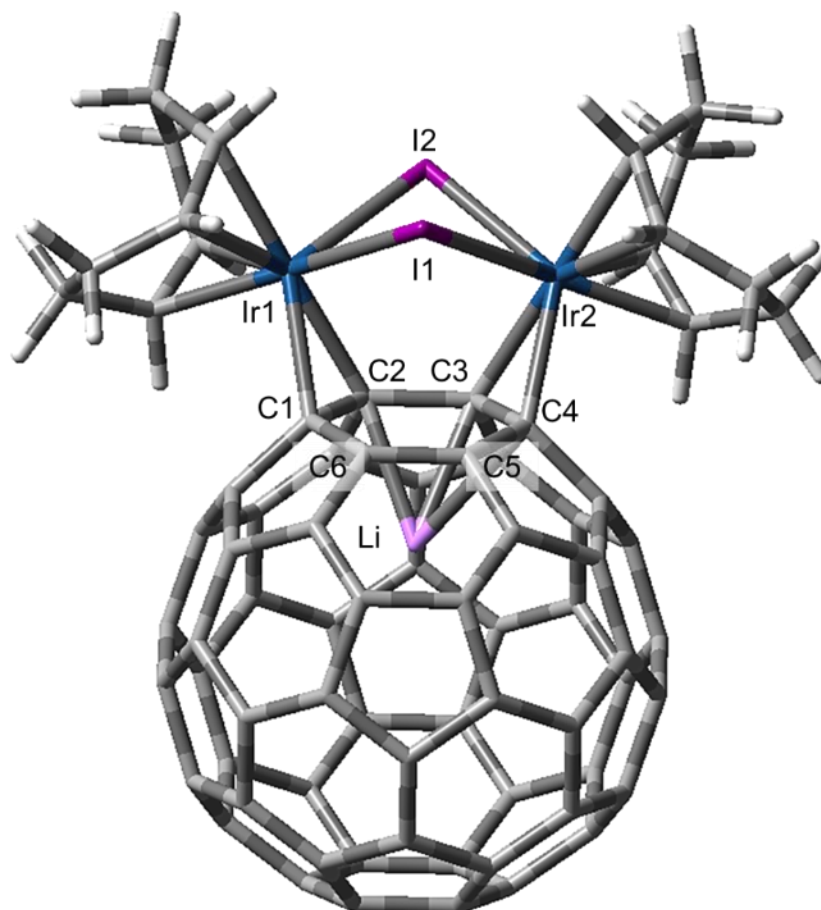

Fig. S25 Optimised structure of **3-opt**.

**Table S8** Selected bond distances (Å) and angles (°) of **3-opt** and the crystal structure of **3**

|        | X-ray     | Calcd. |                                      | X-ray           | Calcd. |
|--------|-----------|--------|--------------------------------------|-----------------|--------|
| Ir1–I1 | 2.6877(8) | 2.772  | Li <sub>A</sub> /Li <sub>B</sub> –C1 | 2.38(5)/2.81(9) | 2.397  |
| Ir1–I2 | 2.7611(6) | 2.878  | Li <sub>A</sub> /Li <sub>B</sub> –C2 | 2.24(5)/2.57(8) | 2.252  |
| Ir2–I1 | 2.6747(7) | 2.772  | Li <sub>A</sub> /Li <sub>B</sub> –C3 | 2.29(5)/2.25(7) | 2.252  |
| Ir2–I2 | 2.7740(6) | 2.878  | Li <sub>A</sub> /Li <sub>B</sub> –C4 | 2.47(6)/2.20(7) | 2.398  |
| Ir1–C1 | 2.187(8)  | 2.209  | Li <sub>A</sub> /Li <sub>B</sub> –C5 | 2.45(5)/2.32(8) | 2.389  |
| Ir1–C2 | 2.184(8)  | 2.198  | Li <sub>A</sub> /Li <sub>B</sub> –C6 | 2.40(4)/2.60(9) | 2.389  |
| Ir2–C3 | 2.175(8)  | 2.198  | Ir1–I1–Ir2                           | 85.68(2)        | 85.56  |
| Ir2–C4 | 2.185(8)  | 2.209  | Ir1–I2–Ir2                           | 82.402(17)      | 81.72  |
| C1–C2  | 1.497(11) | 1.500  | I1–Ir1–I2                            | 80.27(2)        | 79.70  |
| C2–C3  | 1.535(11) | 1.550  | I1–Ir2–I2                            | 80.26(2)        | 79.70  |
| C3–C4  | 1.502(11) | 1.500  |                                      |                 |        |
| C4–C5  | 1.501(11) | 1.503  |                                      |                 |        |
| C5–C6  | 1.387(11) | 1.391  |                                      |                 |        |
| C6–C1  | 1.506(11) | 1.503  |                                      |                 |        |

**Table S9** Optimised atomic coordinates of **3-opt**

| Symbol | x          | y          | z          |
|--------|------------|------------|------------|
| Ir     | -0.0086768 | -0.0259692 | -0.0695440 |
| Ir     | -0.0180502 | -0.0245811 | 3.6964512  |
| Li     | 3.8019774  | -0.0215974 | 1.8223557  |
| I      | -1.4299642 | 1.6277113  | 1.8092708  |
| I      | -0.7368110 | -1.9270302 | 1.8123726  |
| C      | 2.0690744  | -0.6761117 | 0.3012712  |
| C      | 1.7821072  | 0.5963070  | 1.0427682  |
| C      | 1.7782870  | 0.5969345  | 2.5924632  |
| C      | 2.0615751  | -0.6748374 | 3.3363792  |
| C      | 2.4573472  | -1.8706372 | 2.5155782  |
| C      | 2.4607847  | -1.8712333 | 1.1250399  |
| C      | 0.6562941  | 0.9045208  | -1.9644939 |
| C      | -0.2886183 | 1.7469240  | -1.3470190 |
| C      | -1.7262457 | 1.8659002  | -1.7945327 |
| C      | -2.3922051 | 0.5002007  | -2.0280442 |
| C      | -1.8040902 | -0.5947885 | -1.1452276 |
| C      | -0.7355642 | -1.4569557 | -1.5387354 |
| C      | 0.0067373  | -1.3739177 | -2.8500279 |
| C      | 0.3921004  | 0.0656861  | -3.2034153 |
| C      | -0.3044905 | 1.7493442  | 4.9711139  |
| C      | 0.6375159  | 0.9075930  | 5.5938788  |
| C      | 0.3674918  | 0.0696719  | 6.8321644  |
| C      | -0.0160282 | -1.3702639 | 6.4780615  |
| C      | -0.7518538 | -1.4544447 | 5.1631804  |
| C      | -1.8186007 | -0.5927627 | 4.7638006  |
| C      | -2.4111505 | 0.5028435  | 5.6428750  |
| C      | -1.7443525 | 1.8684522  | 5.4113163  |
| C      | 3.0962077  | -0.6601271 | -0.7713441 |
| C      | 3.7180202  | 0.5076975  | -1.1885805 |
| C      | 3.4821411  | 1.7490088  | -0.4545539 |
| C      | 2.6320353  | 1.7559487  | 0.6515768  |
| C      | 3.0450930  | 2.4940313  | 1.8199985  |
| C      | 2.6262312  | 1.7568932  | 2.9869450  |
| C      | 3.4708127  | 1.7508698  | 4.0973037  |
| C      | 3.7030202  | 0.5101735  | 4.8335222  |
| C      | 3.0833012  | -0.6579885 | 4.4141287  |
| C      | 3.8504276  | -1.8774894 | 4.3986964  |
| C      | 3.4657482  | -2.6260083 | 3.2233600  |
| C      | 4.4197989  | -3.3880003 | 2.5445453  |
| C      | 4.4233761  | -3.3885916 | 1.1071093  |
| C      | 3.4727102  | -2.6271816 | 0.4229159  |
| C      | 3.8632426  | -1.8796243 | -0.7511114 |
| C      | 5.1885595  | -1.9058537 | -1.1922720 |
| C      | 5.8171026  | -0.6881004 | -1.6458179 |
| C      | 5.0887669  | 0.5025251  | -1.6348044 |
| C      | 5.7094528  | 1.7313128  | -1.1871788 |
| C      | 4.7166383  | 2.4976281  | -0.4593893 |
| C      | 5.0904592  | 3.2420091  | 0.6575865  |
| C      | 4.2401220  | 3.2352568  | 1.8226711  |
| C      | 5.0846511  | 3.2429548  | 2.9919597  |
| C      | 4.7052693  | 2.4994959  | 4.1076746  |
| C      | 5.6944431  | 1.7337854  | 4.8410341  |
| C      | 5.0715283  | 0.5053678  | 5.2866005  |
| C      | 5.7998002  | -0.6852488 | 5.3021694  |
| C      | 5.1735238  | -1.9033648 | 4.8464841  |
| C      | 6.1662513  | -2.6798038 | 4.1283598  |
| C      | 5.7956438  | -3.4092989 | 3.0012637  |
| C      | 6.6511156  | -3.4203985 | 1.8313896  |
| C      | 5.8014765  | -3.4102595 | 0.6572619  |
| C      | 6.1776997  | -2.6816977 | -0.4685760 |
| C      | 7.4164752  | -1.9324685 | -0.4690906 |
| C      | 7.1920366  | -0.6968143 | -1.1964518 |
| C      | 7.7889175  | 0.4857537  | -0.7608504 |
| C      | 7.0343136  | 1.7241269  | -0.7596698 |
| C      | 7.4215177  | 2.4884659  | 0.4116094  |
| C      | 6.4692247  | 3.2359282  | 1.1036778  |
| C      | 6.4656142  | 3.2365132  | 2.5527334  |
| C      | 7.4144453  | 2.4896327  | 3.2501526  |
| C      | 7.0214125  | 1.7262499  | 4.4201172  |
| C      | 7.7759849  | 0.4878776  | 4.4260548  |
| C      | 7.1769554  | -0.6943315 | 4.8596648  |
| C      | 7.4050107  | -1.9305788 | 4.1344376  |
| C      | 8.2244284  | -1.9340449 | 3.0070807  |
| C      | 7.8413746  | -2.6942065 | 1.8340574  |
| C      | 8.2302668  | -1.9350081 | 0.6623347  |
| C      | 8.8521276  | -0.7054093 | 1.1113077  |
| C      | 8.6355244  | 0.4812322  | 0.4132677  |
| C      | 8.4083455  | 1.7182745  | 1.1364324  |
| C      | 8.4048777  | 1.7188509  | 2.5308868  |
| C      | 8.6284507  | 0.4824012  | 3.2561900  |
| C      | 8.8485257  | -0.7048145 | 2.5602097  |
| H      | 1.6853413  | 1.2118283  | -1.8417092 |
| H      | 0.1063604  | 2.6053586  | -0.8048962 |
| H      | -1.7577287 | 2.4855291  | -2.7039091 |
| H      | -2.2816261 | 2.4215874  | -1.0327054 |
| H      | -2.3249674 | 0.2034284  | -3.0802911 |
| H      | -3.4617943 | 0.5838045  | -1.8123874 |
| H      | -2.5053787 | -1.0143749 | -0.4259705 |
| H      | -0.7338400 | -2.4555078 | -1.1011199 |
| H      | 0.9147291  | -1.9803916 | -2.7613473 |
| H      | -0.5923315 | -1.8340051 | -3.6501767 |
| H      | 1.2967902  | 0.0639860  | -3.8203182 |
| H      | -0.3842095 | 0.5454175  | -3.8080627 |
| H      | 0.0930314  | 2.6073771  | 4.4302169  |
| H      | 1.6670890  | 1.2150166  | 5.4758618  |
| H      | 1.2692287  | 0.0685451  | 7.4533766  |
| H      | -0.4117304 | 0.5497902  | 7.4327481  |
| H      | 0.8924318  | -1.9767550 | 6.3943792  |
| H      | -0.6190128 | -1.8297255 | 7.2756233  |
| H      | -0.7478415 | -2.4533498 | 4.7263809  |
| H      | -2.5163285 | -1.0130354 | 4.0414879  |
| H      | -2.3488681 | 0.2069988  | 6.6956856  |
| H      | -3.4797184 | 0.5860496  | 5.4220604  |
| H      | -1.7805679 | 2.4890478  | 6.3198559  |
| H      | -2.2960176 | 2.4231506  | 4.6460729  |

## 6-2. Frontier orbitals and energy levels of 1-opt, 2-opt and 3-opt

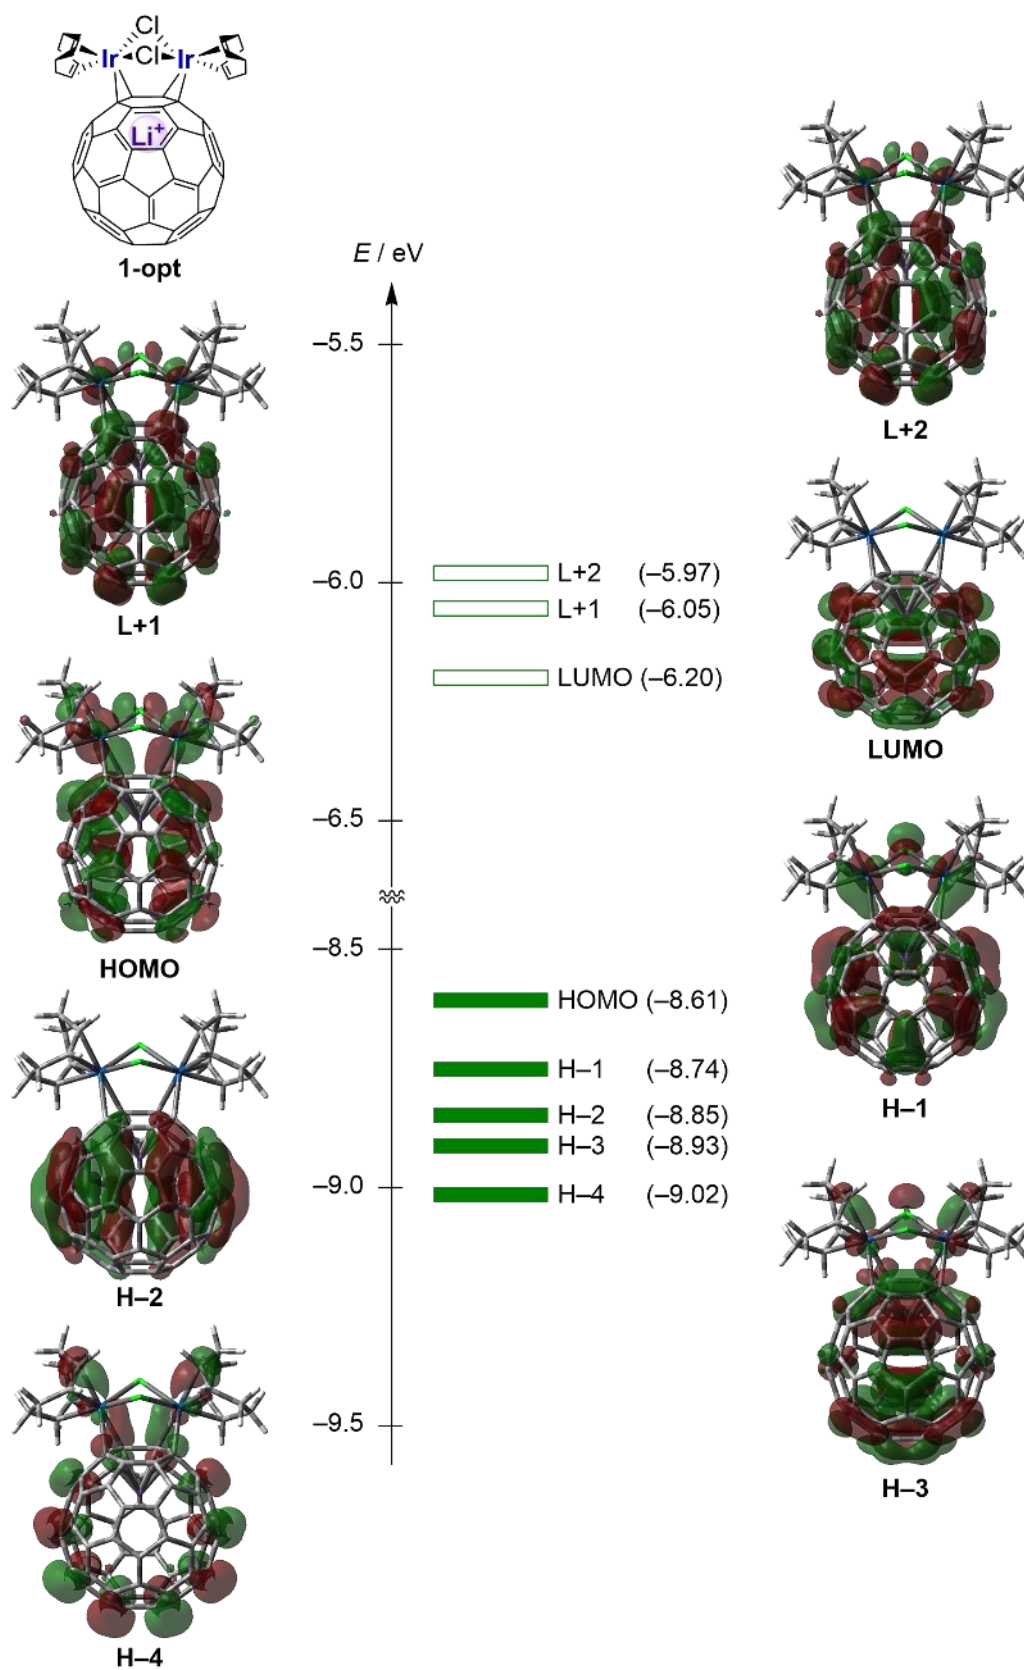

**Fig. S26** Kohn-Sham orbitals and energy levels of **1-opt** (from LUMO+2 to HOMO-4, isovalue = 0.02).

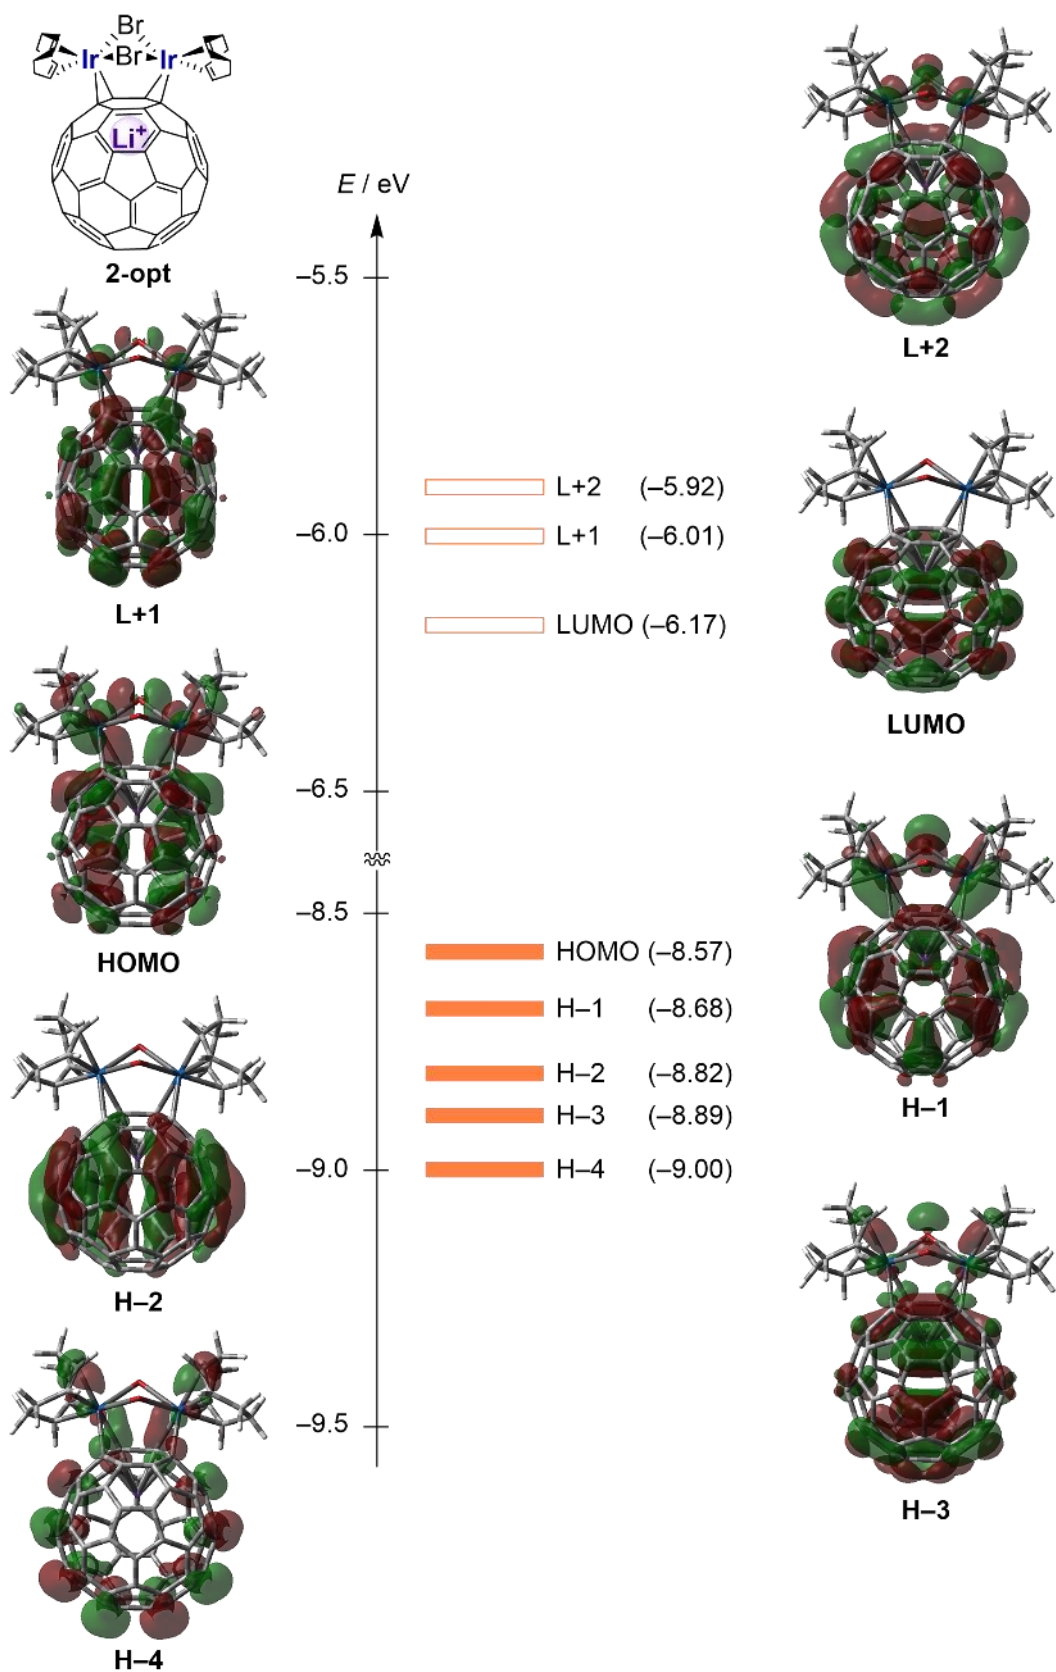

**Fig. S27** Kohn-Sham orbitals and energy levels of **2-opt** (from LUMO+2 to HOMO-4, isovalue = 0.02).

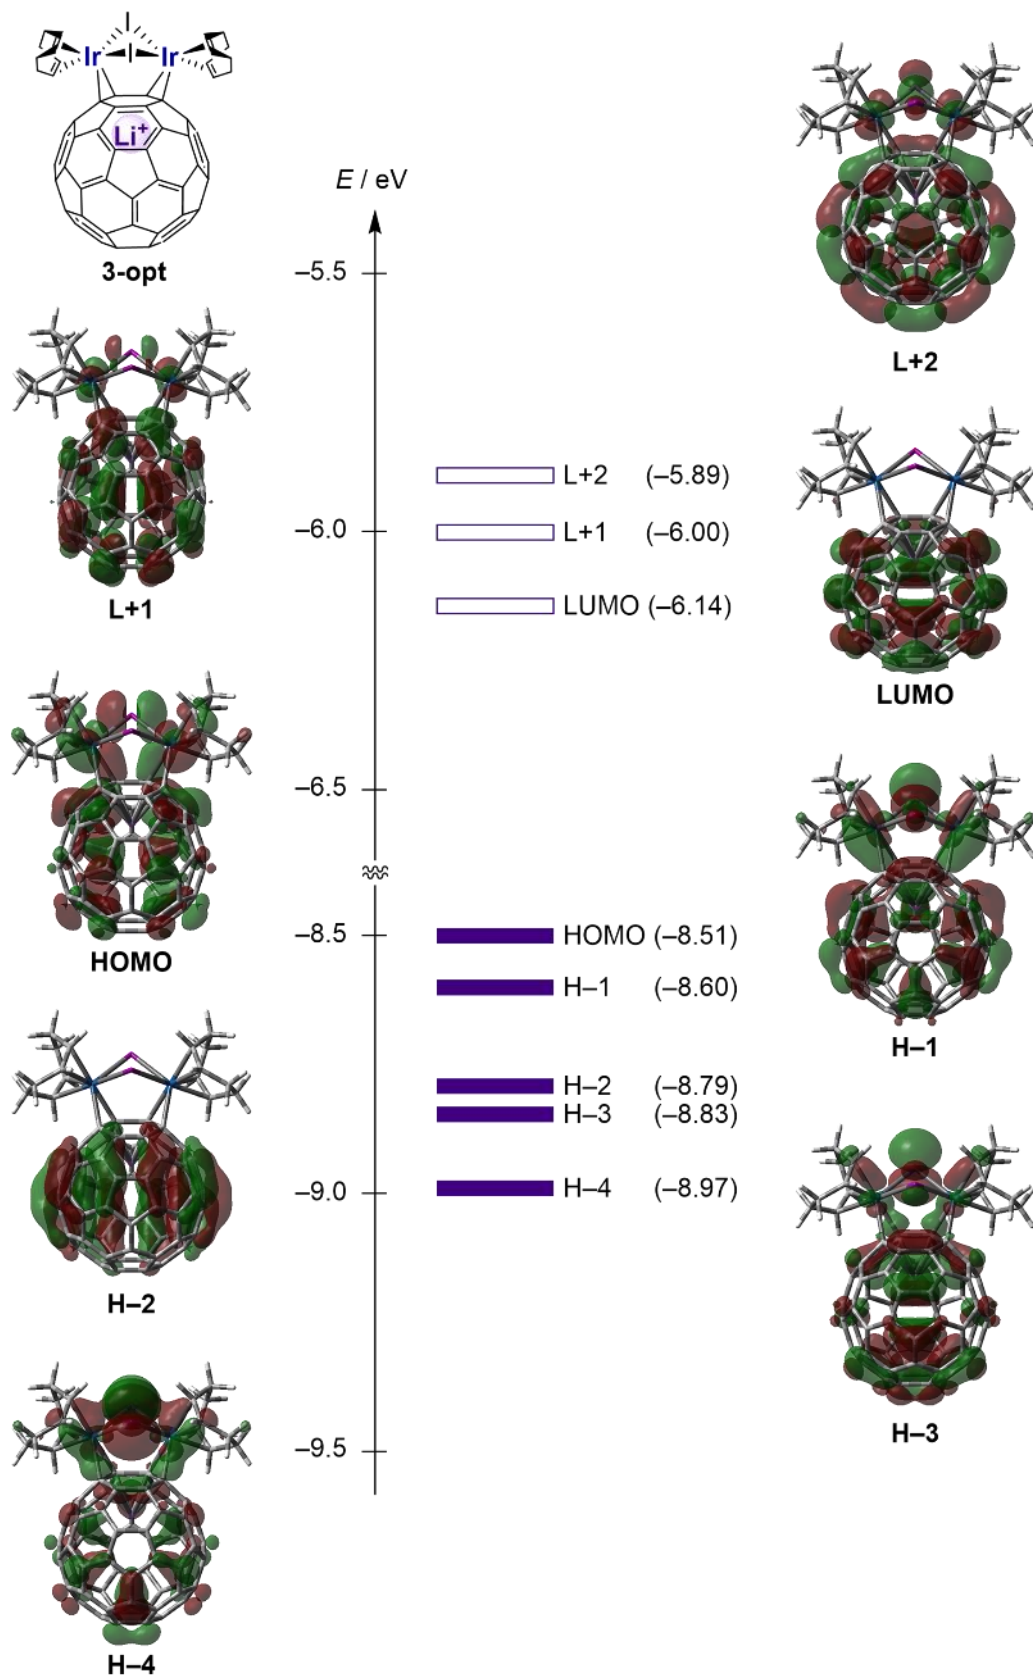

**Fig. S28** Kohn-Sham orbitals and energy levels of **3-opt** (from LUMO+2 to HOMO-4, isovalue = 0.02).

### 6-3. NBO analysis of 1-opt, 2-opt and 3-opt

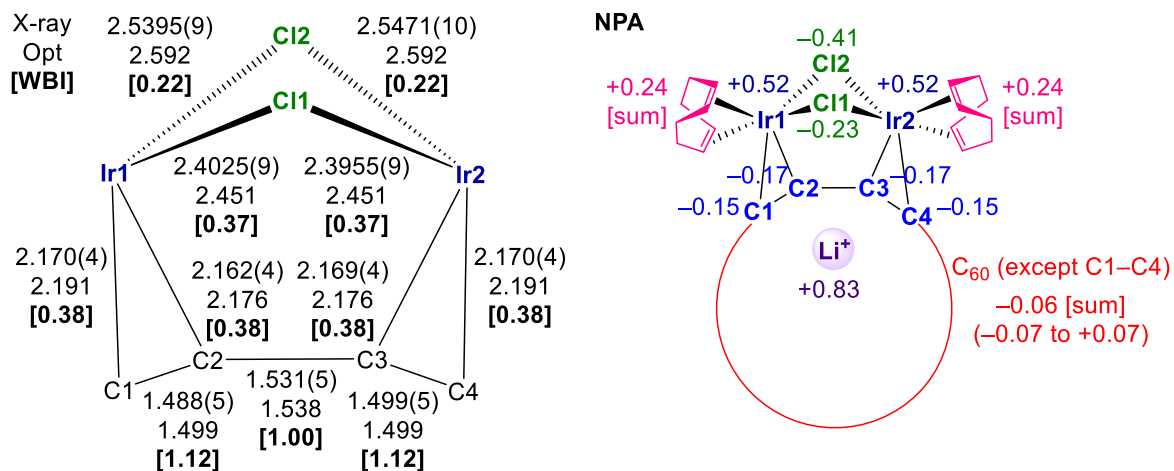

Fig. S29 Selected bond distances (Å), WBI values and NPA charges of **1-opt**.

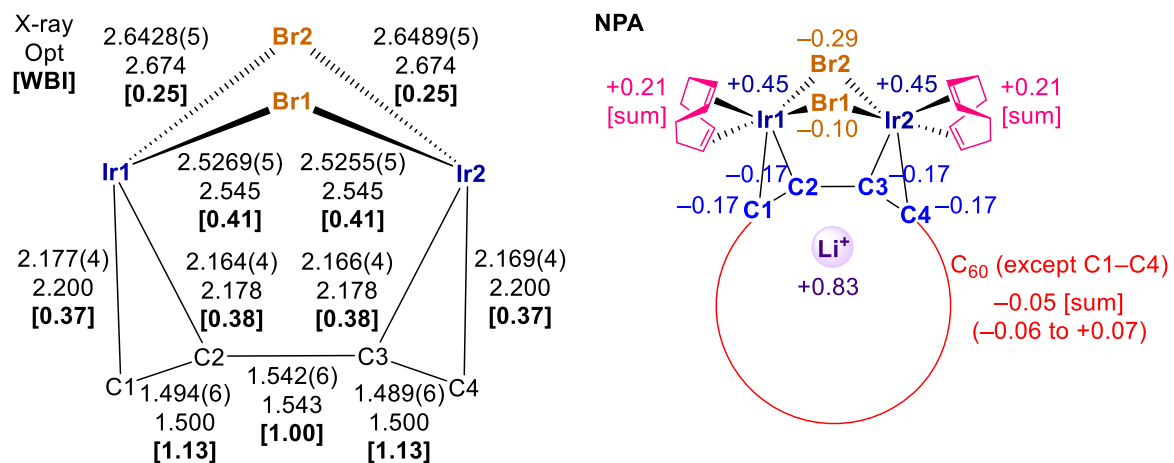

Fig. S30 Selected bond distances (Å), WBI values and NPA charges of **2-opt**.

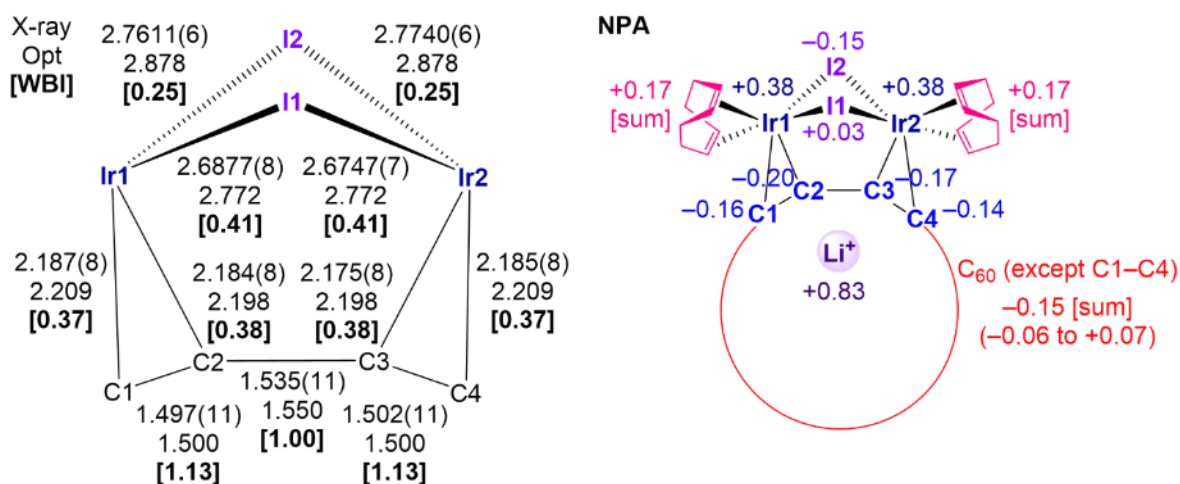

Fig. S31 Selected bond distances (Å), WBI values and NPA charges of **3-opt**.



#### 6-4. GIAO calculations and assignments of the proton signals of cod ligands in 1-opt

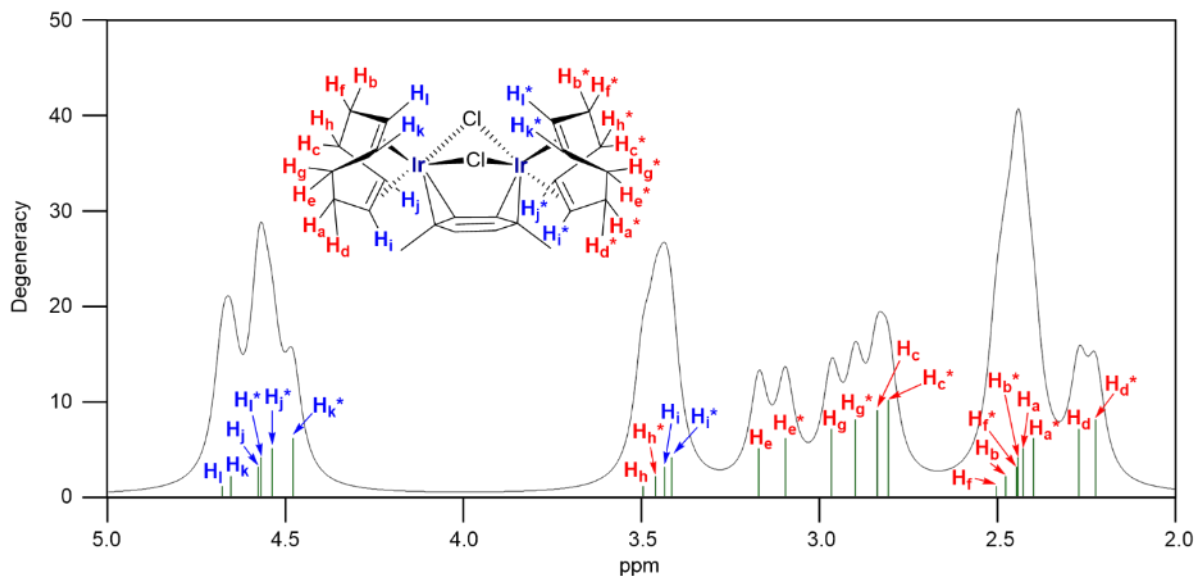

**Fig. S32** Simulated  $^1\text{H}$  NMR spectrum of **1-opt** (degeneracy tolerance: 0.25; peak half-width at half height: 0.03 ppm).

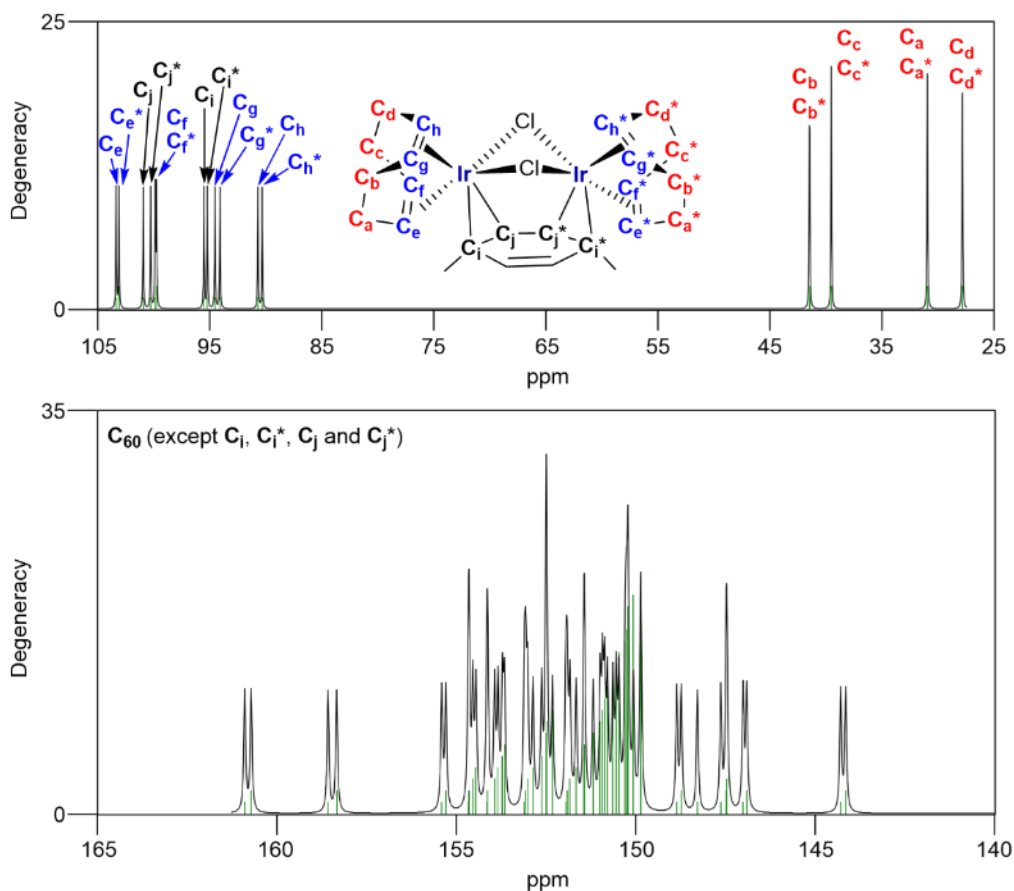

**Fig. S33** Simulated  $^{13}\text{C}$  NMR spectrum of **1-opt** (degeneracy tolerance: 0.25; peak half-width at half height: 0.03 ppm).

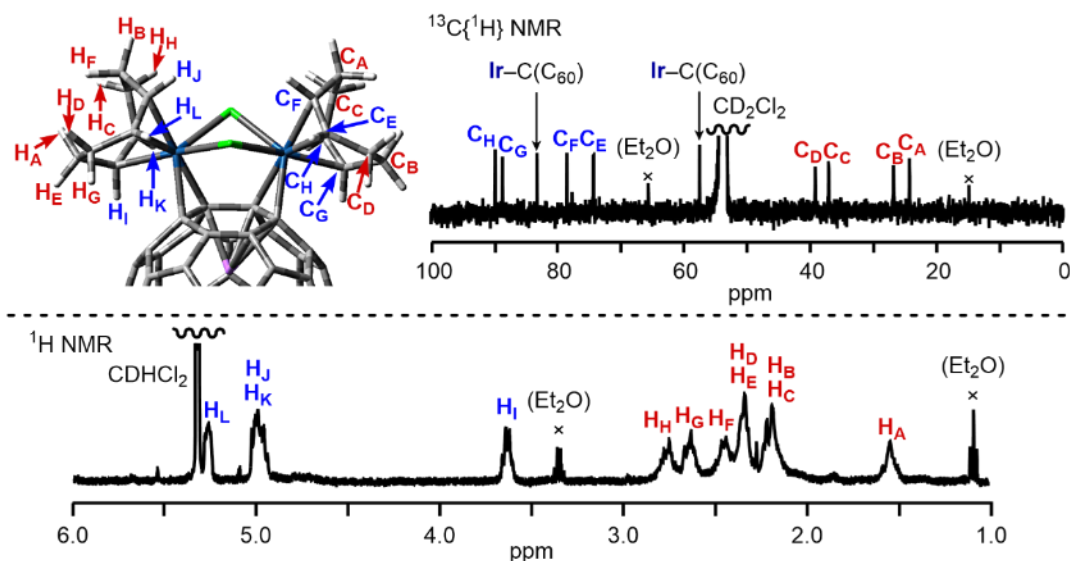

**Fig. S34** Assignments of the  $^1\text{H}$  and  $^{13}\text{C}$  NMR signals of the cod ligands of **1** based on 2D NMR spectra ( $^1\text{H}$ - $^1\text{H}$  COSY and  $^1\text{H}$ - $^{13}\text{C}$  HSQC) and theoretical calculations.

## 6-5. TD-DFT calculations

**Table S10** Excitation energies and oscillator strengths ( $f$ ) of **1** with major optical transitions (threshold:  $f \geq 0.01$  except excited state 1).

|                                                                                                                     |                                                      |                                                      |
|---------------------------------------------------------------------------------------------------------------------|------------------------------------------------------|------------------------------------------------------|
| 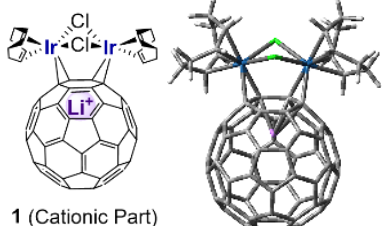 <p><b>1 (Cationic Part)</b></p> | Excited State 13: Singlet-?Sym 2.3719                | 267 -> 277 -0.39114                                  |
|                                                                                                                     | eV 522.72 nm $f=0.0103$ $\langle S^*2 \rangle=0.000$ | 269 -> 277 0.10810                                   |
|                                                                                                                     | 271 -> 277 0.34422                                   | 274 -> 279 0.44179                                   |
|                                                                                                                     | 272 -> 278 0.57618                                   | 275 -> 281 0.10065                                   |
|                                                                                                                     | 273 -> 277 -0.12533                                  | 275 -> 282 0.23360                                   |
|                                                                                                                     | 274 -> 278 0.11848                                   |                                                      |
|                                                                                                                     | Excited State 21: Singlet-?Sym 2.7778                | Excited State 34: Singlet-?Sym 3.1866                |
|                                                                                                                     | eV 446.34 nm $f=0.0626$ $\langle S^*2 \rangle=0.000$ | eV 389.08 nm $f=0.0381$ $\langle S^*2 \rangle=0.000$ |
|                                                                                                                     | 268 -> 278 0.25725                                   | 262 -> 276 -0.15833                                  |
|                                                                                                                     | 269 -> 277 -0.42209                                  | 265 -> 278 0.18818                                   |
|                                                                                                                     | 270 -> 278 0.46926                                   | 266 -> 277 0.38948                                   |
|                                                                                                                     |                                                      | 267 -> 277 0.16634                                   |
|                                                                                                                     |                                                      | 269 -> 280 -0.10797                                  |
|                                                                                                                     | Excited State 22: Singlet-?Sym 2.7969                | 273 -> 280 0.13294                                   |
|                                                                                                                     | eV 443.29 nm $f=0.0119$ $\langle S^*2 \rangle=0.000$ | 273 -> 282 -0.13409                                  |
|                                                                                                                     | 268 -> 276 0.67764                                   | 274 -> 279 0.17855                                   |
|                                                                                                                     | 269 -> 277 -0.11271                                  | 275 -> 281 0.23049                                   |
|                                                                                                                     |                                                      | 275 -> 282 -0.24832                                  |
|                                                                                                                     | Excited State 24: Singlet-?Sym 2.9241                | Excited State 39: Singlet-?Sym 3.2287                |
|                                                                                                                     | eV 424.01 nm $f=0.0821$ $\langle S^*2 \rangle=0.000$ | eV 384.00 nm $f=0.0194$ $\langle S^*2 \rangle=0.000$ |
|                                                                                                                     | 265 -> 278 -0.10439                                  | 265 -> 278 -0.10500                                  |
|                                                                                                                     | 267 -> 277 0.15316                                   | 266 -> 277 0.38912                                   |
|                                                                                                                     | 268 -> 278 0.57458 (66%) <b>H-7</b> → <b>L+2</b>     | 271 -> 280 0.12413                                   |
|                                                                                                                     | 268 -> 279 0.10546                                   | 273 -> 280 0.15107                                   |
|                                                                                                                     | 270 -> 278 -0.23428 (11%) <b>H-5</b> → <b>L+2</b>    | 273 -> 281 0.21432                                   |
|                                                                                                                     | Excited State 29: Singlet-?Sym 3.0810                | 274 -> 279 -0.10427                                  |
|                                                                                                                     | eV 402.42 nm $f=0.0153$ $\langle S^*2 \rangle=0.000$ | 275 -> 282 0.44157                                   |
|                                                                                                                     | 267 -> 277 -0.18953                                  | Excited State 40: Singlet-?Sym 3.2558                |
|                                                                                                                     | 274 -> 279 -0.35861                                  | eV 380.81 nm $f=0.0119$ $\langle S^*2 \rangle=0.000$ |
|                                                                                                                     | 275 -> 280 0.14595                                   | 264 -> 276 0.11491                                   |
|                                                                                                                     | 275 -> 281 0.51210                                   | 265 -> 276 0.19512                                   |
|                                                                                                                     | Excited State 33: Singlet-?Sym 3.1418                | 265 -> 278 0.39662                                   |
|                                                                                                                     | eV 394.63 nm $f=0.0604$ $\langle S^*2 \rangle=0.000$ | 265 -> 279 0.11516                                   |
|                                                                                                                     |                                                      |                                                      |



|                                       |                                       |                                       |                                       |
|---------------------------------------|---------------------------------------|---------------------------------------|---------------------------------------|
| 267 -> 277                            | 0.20526                               | Excited State 61: Singlet-?Sym 3.5595 | Excited State 71: Singlet-?Sym 3.6651 |
| 273 -> 280                            | -0.22455                              | eV 348.31 nm f=0.0577 <S**2>=0.000    | eV 338.29 nm f=0.0161 <S**2>=0.000    |
| 275 -> 282                            | 0.33214                               | 258 -> 276 -0.15004                   | 257 -> 277 0.10906                    |
| Excited State 44: Singlet-?Sym 3.3037 |                                       | 258 -> 278 0.15304                    | 258 -> 276 0.47961                    |
| eV 375.29 nm f=0.0117 <S**2>=0.000    |                                       | 259 -> 276 -0.22756                   | 261 -> 277 0.12520                    |
| 261 -> 277 0.13609                    |                                       | 260 -> 277 0.25636                    | 264 -> 278 -0.18487                   |
| 263 -> 276 0.23342                    |                                       | 261 -> 277 0.24565                    | 265 -> 278 0.11498                    |
| 265 -> 278 0.12041                    |                                       | 262 -> 278 -0.10260                   | 269 -> 280 0.26628                    |
| 272 -> 279 0.34821                    |                                       | 263 -> 278 0.22907                    | 270 -> 279 0.17179                    |
| 273 -> 280 0.31699                    |                                       | 264 -> 276 0.10092                    | 271 -> 280 -0.14016                   |
| 273 -> 281 -0.30870                   |                                       | 266 -> 280 -0.10453                   |                                       |
| 275 -> 282 0.11590                    |                                       | 268 -> 279 -0.13382                   | Excited State 74: Singlet-?Sym 3.6812 |
| Excited State 46: Singlet-?Sym 3.3559 |                                       | 270 -> 279 -0.10727                   | eV 336.81 nm f=0.0161 <S**2>=0.000    |
| eV 369.45 nm f=0.0756 <S**2>=0.000    |                                       | 271 -> 280 -0.10478                   | 258 -> 276 0.11384                    |
| 259 -> 276 0.22524                    |                                       | 273 -> 281 0.20715                    | 259 -> 278 0.42374                    |
| 262 -> 276 0.15573                    | Excited State 62: Singlet-?Sym 3.5680 |                                       | 260 -> 277 -0.21038                   |
| 264 -> 276 -0.24787                   | eV 347.49 nm f=0.0150 <S**2>=0.000    |                                       | 261 -> 277 0.15582                    |
| 264 -> 278 -0.12373                   | 257 -> 276 0.19882                    |                                       | 262 -> 278 -0.15579                   |
| 265 -> 276 0.14494                    | 259 -> 277 0.38389                    |                                       | 264 -> 278 0.12483                    |
| 265 -> 278 0.19954                    | 263 -> 277 0.11857                    |                                       | 270 -> 279 -0.13089                   |
| 268 -> 278 0.10651                    | 268 -> 280 0.14733                    |                                       | 271 -> 282 0.31863                    |
| 271 -> 280 0.12239                    | 269 -> 279 -0.10117                   |                                       | 274 -> 283 0.12248                    |
| 272 -> 279 0.21311                    | 270 -> 280 0.27286                    |                                       | Excited State 75: Singlet-?Sym 3.7009 |
| 273 -> 281 0.30776                    | 272 -> 280 0.17589                    |                                       | eV 335.01 nm f=0.1018 <S**2>=0.000    |
| 273 -> 282 0.15548                    | 274 -> 281 -0.12446                   |                                       | 257 -> 277 0.24296                    |
| 274 -> 279 0.15418                    | 274 -> 282 0.15176                    |                                       | 259 -> 276 -0.12341                   |
| 275 -> 282 -0.10299                   | 275 -> 283 -0.21149                   |                                       | 259 -> 278 -0.17308                   |
| Excited State 48: Singlet-?Sym 3.3862 | Excited State 66: Singlet-?Sym 3.5988 |                                       | 260 -> 277 -0.23824                   |
| eV 366.14 nm f=0.0159 <S**2>=0.000    | eV 344.52 nm f=0.0174 <S**2>=0.000    |                                       | 264 -> 278 0.31043                    |
| 259 -> 276 -0.22274                   | 260 -> 277 -0.10503                   |                                       | 267 -> 280 -0.14337                   |
| 260 -> 277 -0.11489                   | 262 -> 278 -0.18870                   |                                       | 269 -> 280 0.20101                    |
| 262 -> 276 -0.17209                   | 263 -> 278 0.34909                    |                                       | 271 -> 282 -0.19081                   |
| 263 -> 276 -0.18088                   | 264 -> 278 -0.29094                   |                                       | 272 -> 279 -0.13782                   |
| 263 -> 278 0.20592                    | 265 -> 278 -0.13429                   |                                       | 274 -> 283 0.17053                    |
| 270 -> 279 0.10240                    | 267 -> 280 -0.11781                   |                                       | Excited State 76: Singlet-?Sym 3.7088 |
| 271 -> 280 0.35822                    | 271 -> 281 -0.25627                   |                                       | eV 334.30 nm f=0.0816 <S**2>=0.000    |
| 271 -> 281 0.17514                    | 271 -> 282 -0.17382                   |                                       | 257 -> 277 -0.24138                   |
| 272 -> 279 0.22606                    | 272 -> 279 -0.13601                   |                                       | 258 -> 278 -0.23081                   |
| 273 -> 280 -0.10555                   | 273 -> 281 -0.12710                   |                                       | 259 -> 278 -0.20375                   |
| 273 -> 282 -0.12290                   | Excited State 68: Singlet-?Sym 3.6307 |                                       | 261 -> 277 0.27746                    |
| Excited State 49: Singlet-?Sym 3.4089 | eV 341.49 nm f=0.0116 <S**2>=0.000    |                                       | 262 -> 278 0.25439                    |
| eV 363.70 nm f=0.0128 <S**2>=0.000    | 258 -> 276 0.36791                    |                                       | 263 -> 278 0.16198                    |
| 262 -> 276 0.22735                    | 260 -> 277 0.32657                    |                                       | 268 -> 279 0.11900                    |
| 263 -> 276 0.25237                    | 261 -> 277 -0.11223                   |                                       | 270 -> 279 -0.23918                   |
| 271 -> 280 0.37678                    | 262 -> 276 -0.12566                   |                                       | Excited State 80: Singlet-?Sym 3.7498 |
| 272 -> 279 -0.29688                   | 263 -> 276 0.17823                    |                                       | eV 330.64 nm f=0.1094 <S**2>=0.000    |
| 273 -> 281 -0.11732                   | 264 -> 278 0.22915                    |                                       | 256 -> 276 -0.25954 (13%) H-19→L      |
| 273 -> 282 0.17583                    | 268 -> 279 -0.13445                   |                                       | 257 -> 277 0.17506                    |
| Excited State 55: Singlet-?Sym 3.4938 | Excited State 69: Singlet-?Sym 3.6437 |                                       | 262 -> 278 0.10952                    |
| eV 354.87 nm f=0.0165 <S**2>=0.000    | eV 340.27 nm f=0.0369 <S**2>=0.000    |                                       | 263 -> 278 -0.12129                   |
| 260 -> 277 -0.15057                   | 256 -> 276 0.10199                    |                                       | 264 -> 278 -0.12797                   |
| 263 -> 278 -0.12467                   | 259 -> 276 -0.10751                   |                                       | 265 -> 278 -0.10225                   |
| 264 -> 276 0.44614                    | 261 -> 277 -0.34332                   |                                       | 267 -> 280 -0.13995                   |
| 271 -> 280 0.18715                    | 262 -> 278 0.37399                    |                                       | 268 -> 279 -0.22461 (10%) H-7→L+3     |
| 271 -> 281 -0.32577                   | 263 -> 276 0.15066                    |                                       | 269 -> 280 0.15357                    |
| 272 -> 279 0.12282                    | 263 -> 278 0.21716                    |                                       | 270 -> 279 -0.10607                   |
| 273 -> 281 0.19812                    | 271 -> 282 0.24752                    |                                       | 271 -> 282 0.28639 (16%) H-4→L+6      |
| 273 -> 282 -0.11024                   |                                       |                                       | 274 -> 283 -0.24728 (12%) H-1→L+7     |

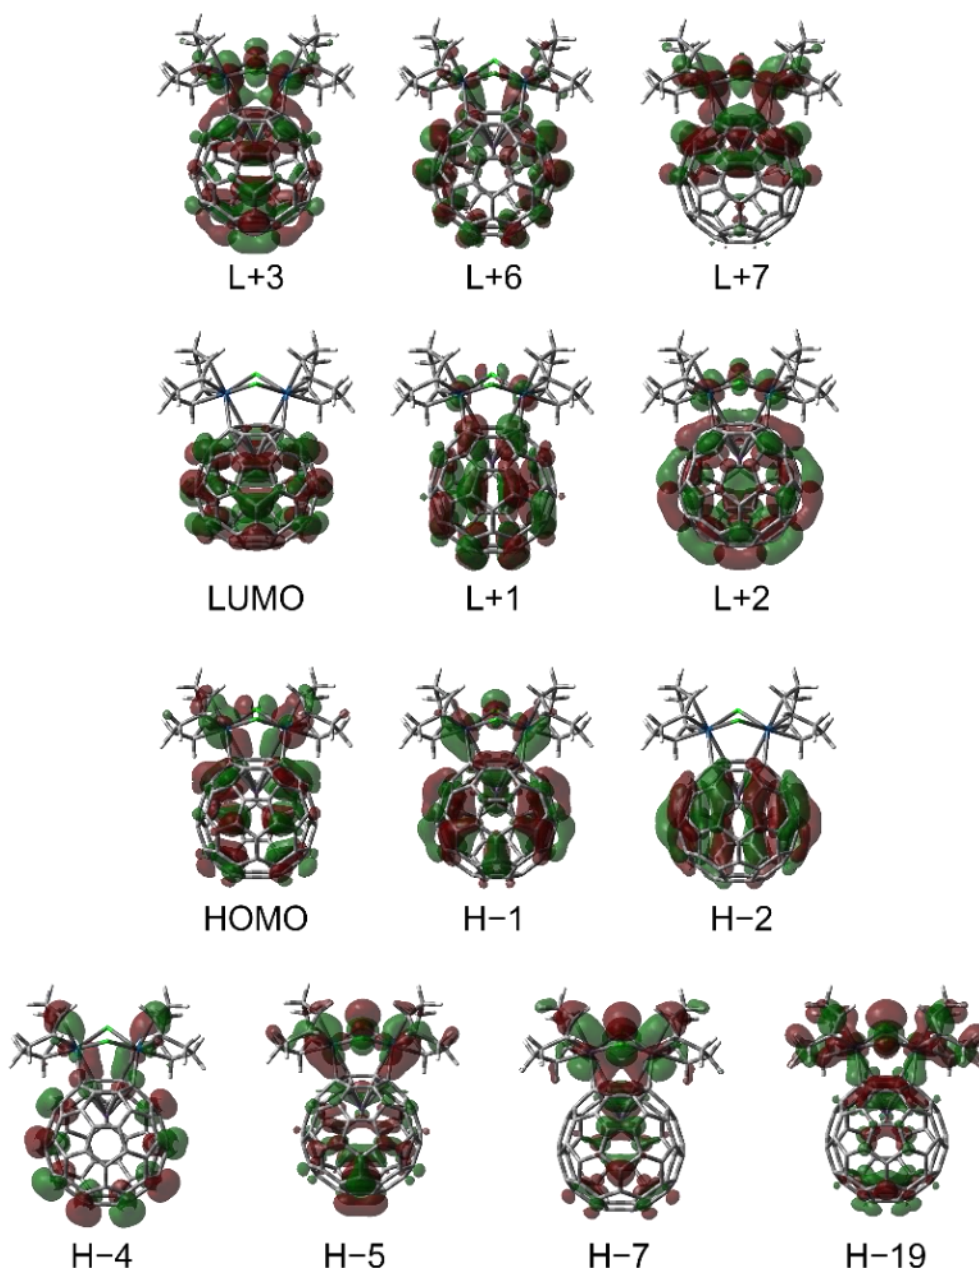

Fig. S35 Kohn-Sham orbitals involved in the main transitions of **1** (isovalue = 0.02).

Table S11 Excitation energies and oscillator strengths ( $f$ ) of **2** with major optical transitions (threshold:  $f \geq 0.01$  except excited state 1).

|                                                                                                                                   |                                                                                                                                                                                                                   |                                     |                                       |
|-----------------------------------------------------------------------------------------------------------------------------------|-------------------------------------------------------------------------------------------------------------------------------------------------------------------------------------------------------------------|-------------------------------------|---------------------------------------|
| 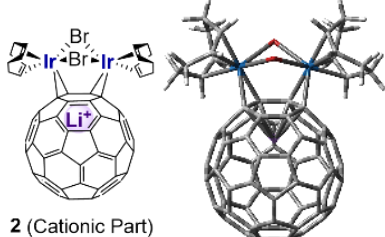 <p><b>2 (Cationic Part)</b></p>               | <p>This state for optimization and/or second-order correction.</p> <p>Total Energy, E(TD-HF/TD-DFT) = -8269.31064236</p> <p>Copying the excited state density for this state as the 1-particle RhoCI density.</p> | 291 -> 295                          | 0.25840 (13%) <b>H-2</b> → <b>L+1</b> |
|                                                                                                                                   |                                                                                                                                                                                                                   | 292 -> 296                          | 0.39656 (31%) <b>H-1</b> → <b>L+2</b> |
| <p>Excitation energies and oscillator strengths:</p>                                                                              | <p>Excited State 3: Singlet-?Sym 1.9999 eV 619.96 nm <math>f=0.0146</math> <math>\langle S^{*2} \rangle = 0.000</math></p>                                                                                        | 289 -> 295                          | -0.14422                              |
|                                                                                                                                   |                                                                                                                                                                                                                   | 291 -> 295                          | 0.50406 (51%) <b>H-2</b> → <b>L+1</b> |
| <p>Excited State 1: Singlet-?Sym 1.7872 eV <b>693.75 nm</b> <math>f=0.0015</math> <math>\langle S^{*2} \rangle = 0.000</math></p> | <p>Excited State 8: Singlet-?Sym 2.2671 eV <b>546.89 nm</b> <math>f=0.0224</math> <math>\langle S^{*2} \rangle = 0.000</math></p>                                                                                 | 292 -> 296                          | -0.44094 (39%) <b>H-3</b> → <b>L</b>  |
|                                                                                                                                   |                                                                                                                                                                                                                   | 293 -> 295                          | 0.11198                               |
| <p>Excited State 20: Singlet-?Sym 2.6885 eV 461.16 nm <math>f=0.0236</math> <math>\langle S^{*2} \rangle = 0.000</math></p>       | <p>Excited State 10: Singlet-?Sym 2.2860 eV <b>542.36 nm</b> <math>f=0.0279</math> <math>\langle S^{*2} \rangle = 0.000</math></p>                                                                                | 286 -> 294                          | 0.64230                               |
|                                                                                                                                   |                                                                                                                                                                                                                   | 286 -> 296                          | 0.11358                               |
| 293 -> 294                                                                                                                        | 0.70091 (98%) <b>H</b> → <b>L</b>                                                                                                                                                                                 | 288 -> 296                          | -0.21279                              |
|                                                                                                                                   | 290 -> 294                                                                                                                                                                                                        | 0.50731 (51%) <b>H-3</b> → <b>L</b> |                                       |

|                                                                             |                                                                             |                                                                             |
|-----------------------------------------------------------------------------|-----------------------------------------------------------------------------|-----------------------------------------------------------------------------|
| Excited State 21: Singlet-?Sym 2.7140<br>eV 456.83 nm f=0.0404 <S**2>=0.000 | Excited State 45: Singlet-?Sym 3.3210<br>eV 373.34 nm f=0.0113 <S**2>=0.000 | 291 -> 299 0.14826                                                          |
| 286 -> 294 -0.13210                                                         | 276 -> 295 -0.10663                                                         | Excited State 58: Singlet-?Sym 3.5013<br>eV 354.11 nm f=0.0141 <S**2>=0.000 |
| 286 -> 296 0.22974                                                          | 278 -> 294 -0.12983                                                         | 276 -> 294 0.11492                                                          |
| 287 -> 295 0.46801                                                          | 280 -> 295 0.11922                                                          | 277 -> 294 0.20917                                                          |
| 288 -> 296 -0.42491                                                         | 281 -> 295 0.12352                                                          | 280 -> 294 -0.18582                                                         |
| Excited State 24: Singlet-?Sym 2.8610<br>eV 433.36 nm f=0.0843 <S**2>=0.000 | 283 -> 296 0.33645                                                          | 281 -> 296 0.10294                                                          |
| 285 -> 295 0.10178                                                          | 286 -> 297 0.17359                                                          | 282 -> 294 -0.11958                                                         |
| 286 -> 296 0.60912 (74%) H-7→L+2                                            | 288 -> 297 -0.15432                                                         | 282 -> 296 0.30051                                                          |
| 287 -> 295 -0.13701                                                         | 289 -> 298 0.12770                                                          | 283 -> 295 -0.10588                                                         |
| 288 -> 296 0.20382                                                          | 290 -> 297 0.11972                                                          | 284 -> 296 -0.12543                                                         |
| 293 -> 297 -0.11396                                                         | 290 -> 299 0.32938                                                          | 285 -> 297 0.10245                                                          |
| Excited State 25: Singlet-?Sym 2.9195<br>eV 424.68 nm f=0.0170 <S**2>=0.000 | 290 -> 300 0.14258                                                          | 287 -> 297 -0.18764                                                         |
| 293 -> 297 0.65927                                                          | 292 -> 299 0.19126                                                          | 288 -> 298 -0.11242                                                         |
| 293 -> 299 0.12804                                                          | Excited State 46: Singlet-?Sym 3.3297<br>eV 372.36 nm f=0.0319 <S**2>=0.000 | 289 -> 297 -0.17559                                                         |
| Excited State 32: Singlet-?Sym 3.0805<br>eV 402.48 nm f=0.0113 <S**2>=0.000 | 277 -> 294 -0.28874                                                         | 289 -> 299 -0.17714                                                         |
| 284 -> 294 -0.36827                                                         | 281 -> 294 0.23266                                                          | 291 -> 299 -0.17520                                                         |
| 285 -> 295 0.19681                                                          | 282 -> 294 -0.13672                                                         | 291 -> 300 -0.16307                                                         |
| 292 -> 298 0.35609                                                          | 284 -> 296 -0.14630                                                         | Excited State 63: Singlet-?Sym 3.5494<br>eV 349.31 nm f=0.0415 <S**2>=0.000 |
| 293 -> 299 0.39137                                                          | 290 -> 298 0.40290                                                          | 277 -> 294 0.22759                                                          |
| Excited State 34: Singlet-?Sym 3.1360<br>eV 395.36 nm f=0.0721 <S**2>=0.000 | 291 -> 300 -0.21837                                                         | 278 -> 295 0.24349                                                          |
| 285 -> 295 0.42867                                                          | 292 -> 298 0.13284                                                          | 279 -> 295 0.14911                                                          |
| 292 -> 298 -0.41893                                                         | Excited State 49: Singlet-?Sym 3.3889<br>eV 365.85 nm f=0.0138 <S**2>=0.000 | 280 -> 296 -0.14205                                                         |
| 293 -> 299 0.10255                                                          | 277 -> 294 0.23582                                                          | 281 -> 296 -0.18537                                                         |
| 293 -> 300 -0.24747                                                         | 278 -> 295 -0.10253                                                         | 282 -> 296 -0.18999                                                         |
| Excited State 36: Singlet-?Sym 3.1725<br>eV 390.81 nm f=0.0228 <S**2>=0.000 | 281 -> 296 -0.18569                                                         | 286 -> 298 0.20635                                                          |
| 277 -> 294 -0.12020                                                         | 282 -> 294 -0.12414                                                         | 288 -> 298 -0.17548                                                         |
| 282 -> 294 -0.10492                                                         | 288 -> 298 0.12248                                                          | 289 -> 299 0.13740                                                          |
| 283 -> 295 0.11514                                                          | 289 -> 297 0.42121                                                          | 291 -> 299 0.17821                                                          |
| 284 -> 296 0.40084                                                          | 289 -> 299 -0.15270                                                         | 291 -> 300 -0.20370                                                         |
| 284 -> 298 -0.10526                                                         | 290 -> 298 0.20491                                                          | Excited State 66: Singlet-?Sym 3.5821<br>eV 346.12 nm f=0.0383 <S**2>=0.000 |
| 285 -> 295 -0.24985                                                         | 291 -> 297 0.11627                                                          | 276 -> 294 -0.14728                                                         |
| 291 -> 300 -0.12389                                                         | Excited State 53: Singlet-?Sym 3.4337<br>eV 361.09 nm f=0.0168 <S**2>=0.000 | 279 -> 295 0.27313                                                          |
| 292 -> 298 -0.24436                                                         | 276 -> 294 -0.11333                                                         | 280 -> 294 -0.18539                                                         |
| 293 -> 299 0.18238                                                          | 281 -> 294 0.21561                                                          | 281 -> 296 0.11272                                                          |
| 293 -> 300 0.22825                                                          | 281 -> 296 0.18582                                                          | 288 -> 298 0.33320                                                          |
| Excited State 38: Singlet-?Sym 3.2037<br>eV 387.01 nm f=0.0425 <S**2>=0.000 | 282 -> 294 -0.29609                                                         | 289 -> 297 -0.15628                                                         |
| 282 -> 294 -0.11352                                                         | 282 -> 296 -0.12478                                                         | 289 -> 299 -0.21557                                                         |
| 283 -> 295 0.17849                                                          | 285 -> 297 0.11504                                                          | 291 -> 299 0.22654                                                          |
| 284 -> 296 -0.33715                                                         | 287 -> 297 -0.13324                                                         | Excited State 70: Singlet-?Sym 3.6165<br>eV 342.82 nm f=0.0102 <S**2>=0.000 |
| 285 -> 295 0.19212                                                          | 288 -> 298 0.15318                                                          | 275 -> 295 -0.11317                                                         |
| 290 -> 298 -0.11336                                                         | 289 -> 299 0.31981                                                          | 276 -> 294 -0.24505                                                         |
| 291 -> 299 0.18104                                                          | 289 -> 300 0.10139                                                          | 277 -> 294 0.11901                                                          |
| 293 -> 300 0.45418                                                          | 290 -> 298 -0.13333                                                         | 279 -> 295 -0.16598                                                         |
| Excited State 42: Singlet-?Sym 3.2656<br>eV 379.66 nm f=0.0110 <S**2>=0.000 | 291 -> 299 -0.16276                                                         | 280 -> 294 -0.15898                                                         |
| 282 -> 294 0.19917                                                          | Excited State 55: Singlet-?Sym 3.4622<br>eV 358.11 nm f=0.0116 <S**2>=0.000 | 280 -> 296 0.11338                                                          |
| 283 -> 295 -0.35088                                                         | 279 -> 294 -0.14247                                                         | 281 -> 296 0.33241                                                          |
| 290 -> 298 0.11109                                                          | 281 -> 295 0.20779                                                          | 282 -> 296 -0.18633                                                         |
| 291 -> 297 0.42007                                                          | 282 -> 295 -0.20937                                                         | 287 -> 297 0.18846                                                          |
| 291 -> 299 -0.16260                                                         | 283 -> 296 -0.12610                                                         | 288 -> 298 -0.23741                                                         |
| 293 -> 300 0.25198                                                          | 288 -> 297 -0.26343                                                         | 289 -> 297 0.18456                                                          |
| Excited State 44: Singlet-?Sym 3.2912<br>eV 376.71 nm f=0.0232 <S**2>=0.000 | 289 -> 298 0.39813                                                          | 289 -> 300 0.12662                                                          |
| 279 -> 295 -0.11813                                                         | 290 -> 297 -0.21014                                                         | 292 -> 301 -0.10761                                                         |
| 281 -> 294 -0.20977                                                         | 290 -> 299 -0.11946                                                         | Excited State 71: Singlet-?Sym 3.6352<br>eV 341.07 nm f=0.0747 <S**2>=0.000 |
| 282 -> 294 -0.29370                                                         | 293 -> 301 -0.10567                                                         | 275 -> 295 0.12227                                                          |
| 290 -> 298 -0.12855                                                         | Excited State 56: Singlet-?Sym 3.4731<br>eV 356.98 nm f=0.0272 <S**2>=0.000 | 276 -> 294 0.12824                                                          |
| 291 -> 297 0.32770                                                          | 276 -> 294 -0.10163                                                         | 277 -> 296 0.15779                                                          |
| 291 -> 299 0.35350                                                          | 278 -> 295 -0.14257                                                         | 279 -> 295 -0.27845                                                         |
| 292 -> 298 0.13033                                                          | 281 -> 294 -0.27464                                                         | 280 -> 296 0.35044                                                          |
| 293 -> 300 -0.16993                                                         | 281 -> 296 0.19120                                                          | 281 -> 296 -0.12490                                                         |
| Excited State 45: Singlet-?Sym 3.3210<br>eV 373.34 nm f=0.0113 <S**2>=0.000 | 282 -> 294 0.20862                                                          | 282 -> 296 -0.16878                                                         |
| 276 -> 295 -0.10663                                                         | 284 -> 296 -0.10978                                                         | 287 -> 297 -0.23038                                                         |
| 278 -> 294 -0.12983                                                         | 285 -> 297 0.12548                                                          | 289 -> 300 0.17493                                                          |
| 280 -> 295 0.11922                                                          | 287 -> 297 -0.16922                                                         | 291 -> 299 0.10014                                                          |
| 281 -> 295 0.12352                                                          | 289 -> 299 0.29531                                                          | Excited State 75: Singlet-?Sym 3.6733<br>eV 337.53 nm f=0.0171 <S**2>=0.000 |
| 283 -> 296 0.33645                                                          | 290 -> 298 0.22355                                                          | 274 -> 294 -0.20189                                                         |
| 286 -> 297 0.17359                                                          |                                                                             |                                                                             |
| 288 -> 297 -0.15432                                                         |                                                                             |                                                                             |
| 289 -> 298 0.12770                                                          |                                                                             |                                                                             |
| 290 -> 297 0.11972                                                          |                                                                             |                                                                             |
| 290 -> 299 0.32938                                                          |                                                                             |                                                                             |
| 290 -> 300 0.14258                                                          |                                                                             |                                                                             |
| 292 -> 299 0.19126                                                          |                                                                             |                                                                             |

|                                       |          |                                       |          |                                       |                        |
|---------------------------------------|----------|---------------------------------------|----------|---------------------------------------|------------------------|
| 276 -> 296                            | -0.22139 | 285 -> 297                            | -0.16638 | 290 -> 300                            | -0.14387               |
| 278 -> 295                            | 0.31198  | 286 -> 298                            | 0.21051  | 293 -> 301                            | -0.13851               |
| 279 -> 295                            | -0.24375 | 288 -> 298                            | 0.10073  |                                       |                        |
| 280 -> 296                            | 0.11981  |                                       |          | Excited State 80: Singlet-?Sym 3.7207 |                        |
| 286 -> 298                            | 0.17338  | Excited State 79: Singlet-?Sym 3.7186 |          | eV 333.23 nm f=0.1083 <S**2>=0.000    |                        |
| 288 -> 298                            | 0.16292  | eV 333.42 nm f=0.0191 <S**2>=0.000    |          | 276 -> 294                            | -0.16989               |
| 289 -> 300                            | -0.24993 | 274 -> 295                            | -0.13612 | 276 -> 296                            | 0.37217 (28%) H-17→L+2 |
| 292 -> 301                            | 0.17377  | 275 -> 296                            | 0.31643  | 277 -> 296                            | 0.13035                |
|                                       |          | 279 -> 296                            | -0.19364 | 278 -> 295                            | 0.15265                |
| Excited State 76: Singlet-?Sym 3.6923 |          | 280 -> 295                            | -0.11156 | 280 -> 296                            | 0.15365                |
| eV 335.79 nm f=0.0436 <S**2>=0.000    |          | 281 -> 295                            | 0.12114  | 282 -> 296                            | 0.18536                |
| 275 -> 295                            | 0.31089  | 284 -> 297                            | -0.17268 | 286 -> 298                            | 0.14235                |
| 276 -> 296                            | 0.14839  | 285 -> 298                            | 0.12072  | 287 -> 297                            | -0.15686               |
| 278 -> 295                            | -0.21001 | 286 -> 297                            | 0.10610  | 289 -> 300                            | 0.25193 (13%) H-4→L+6  |
| 280 -> 296                            | -0.26682 | 287 -> 298                            | 0.36882  | 292 -> 301                            | 0.24837 (12%) H-1→L+7  |
| 281 -> 296                            | 0.26888  | 288 -> 300                            | 0.15733  |                                       |                        |

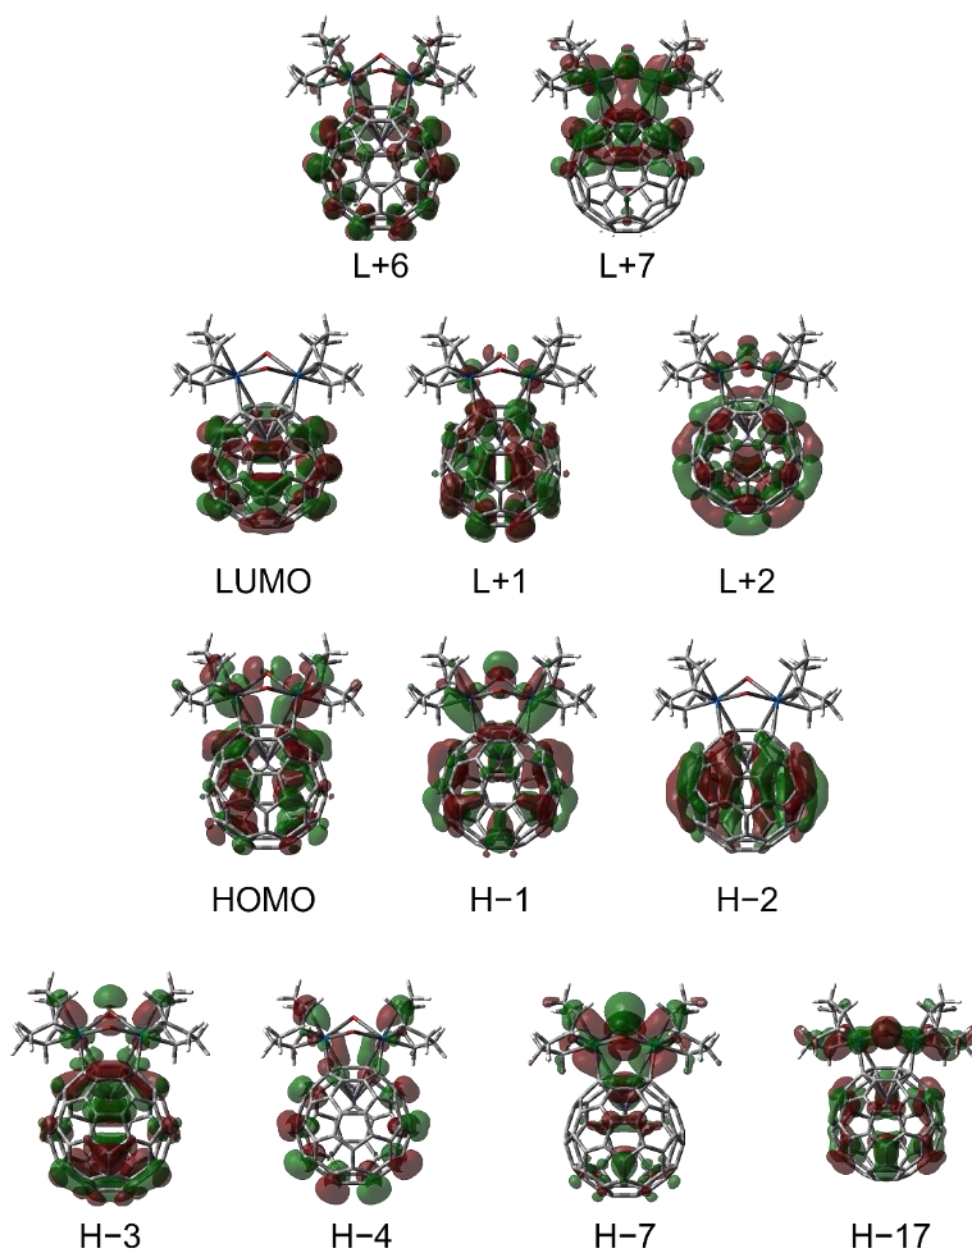

**Fig. S36** Kohn-Sham orbitals involved in the main transitions of **2** (isovalue = 0.02).

**Table S12** Excitation energies and oscillator strengths ( $f$ ) of **3** with major optical transitions (threshold:  $f \geq 0.01$  except excited state 1).

| 3 (Cationic Part)                                                                                                                                                                                                                                                                                                                     |  | 274 -> 285                                                                                                                                                                       |                        | 282 -> 291                                                                                                                                                                                                                                                                 |  |
|---------------------------------------------------------------------------------------------------------------------------------------------------------------------------------------------------------------------------------------------------------------------------------------------------------------------------------------|--|----------------------------------------------------------------------------------------------------------------------------------------------------------------------------------|------------------------|----------------------------------------------------------------------------------------------------------------------------------------------------------------------------------------------------------------------------------------------------------------------------|--|
| 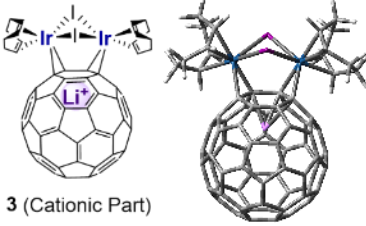                                                                                                                                                                                                                                                     |  | 0.24604 (12%) H-9->L+1                                                                                                                                                           |                        | -0.10270                                                                                                                                                                                                                                                                   |  |
|                                                                                                                                                                                                                                                                                                                                       |  | 275 -> 286                                                                                                                                                                       | 0.58844 (69%) H-3->L+2 |                                                                                                                                                                                                                                                                            |  |
|                                                                                                                                                                                                                                                                                                                                       |  | 279 -> 288                                                                                                                                                                       | -0.11578               |                                                                                                                                                                                                                                                                            |  |
| Excitation energies and oscillator strengths:                                                                                                                                                                                                                                                                                         |  | Excited State 55: Singlet-?Sym 3.3695<br>eV 367.96 nm $f=0.0140$ $\langle S^{*2} \rangle=0.000$                                                                                  |                        |                                                                                                                                                                                                                                                                            |  |
| Excited State 1: Singlet-?Sym 1.7585<br>eV 705.05 nm $f=0.0015$ $\langle S^{*2} \rangle=0.000$<br>283 -> 284 0.69940 (98%) H->L<br>This state for optimization and/or second-order correction.<br>Total Energy, E(TD-HF/TD-DFT) = -3721.52770114<br>Copying the excited state density for this state as the 1-particle RhoCI density. |  | Excited State 33: Singlet-?Sym 3.0235<br>eV 410.07 nm $f=0.0297$ $\langle S^{*2} \rangle=0.000$                                                                                  |                        | 268 -> 285 0.10589<br>269 -> 284 -0.14774<br>271 -> 285 -0.11550<br>272 -> 285 -0.25563<br>274 -> 286 0.15317<br>276 -> 287 -0.15071<br>277 -> 288 0.22099<br>278 -> 288 0.29628<br>280 -> 289 -0.16248<br>280 -> 290 0.13155<br>282 -> 290 -0.13350<br>283 -> 291 0.26714 |  |
| Excited State 3: Singlet-?Sym 1.9559<br>eV 633.90 nm $f=0.0157$ $\langle S^{*2} \rangle=0.000$<br>282 -> 284 0.21141<br>282 -> 286 -0.14499<br>283 -> 285 0.64808                                                                                                                                                                     |  | Excited State 35: Singlet-?Sym 3.0313<br>eV 409.01 nm $f=0.0582$ $\langle S^{*2} \rangle=0.000$                                                                                  |                        | Excited State 56: Singlet-?Sym 3.3737<br>eV 367.51 nm $f=0.0276$ $\langle S^{*2} \rangle=0.000$                                                                                                                                                                            |  |
| Excited State 7: Singlet-?Sym 2.1389<br>eV 579.67 nm $f=0.0168$ $\langle S^{*2} \rangle=0.000$<br>280 -> 284 0.46719<br>281 -> 285 -0.35241<br>282 -> 286 0.34998<br>283 -> 285 0.10051                                                                                                                                               |  | Excited State 36: Singlet-?Sym 3.0586<br>eV 405.37 nm $f=0.0548$ $\langle S^{*2} \rangle=0.000$                                                                                  |                        | 271 -> 284 0.23446<br>272 -> 284 0.27623<br>272 -> 286 0.10505<br>276 -> 288 0.17476<br>278 -> 289 -0.12481<br>279 -> 288 0.29732<br>281 -> 289 0.28483<br>282 -> 291 -0.11084                                                                                             |  |
| Excited State 8: Singlet-?Sym 2.2313<br>eV 555.66 nm $f=0.0520$ $\langle S^{*2} \rangle=0.000$<br>280 -> 284 -0.45666 (42%) H-3->L<br>282 -> 286 0.50355 (51%) H-1->L+2                                                                                                                                                               |  | Excited State 40: Singlet-?Sym 3.1265<br>eV 396.56 nm $f=0.0540$ $\langle S^{*2} \rangle=0.000$                                                                                  |                        | Excited State 61: Singlet-?Sym 3.4488<br>eV 359.50 nm $f=0.0131$ $\langle S^{*2} \rangle=0.000$                                                                                                                                                                            |  |
| Excited State 10: Singlet-?Sym 2.2620<br>eV 548.11 nm $f=0.0190$ $\langle S^{*2} \rangle=0.000$<br>278 -> 285 -0.10283<br>279 -> 284 0.15444<br>280 -> 284 0.20085<br>281 -> 285 0.56674<br>282 -> 286 0.29043<br>283 -> 285 0.10044                                                                                                  |  | Excited State 45: Singlet-?Sym 3.2197<br>eV 385.08 nm $f=0.0306$ $\langle S^{*2} \rangle=0.000$                                                                                  |                        | 266 -> 284 0.15024<br>268 -> 284 -0.23906<br>270 -> 284 0.20732<br>271 -> 286 -0.25841<br>272 -> 286 -0.13129<br>278 -> 289 0.42558<br>281 -> 289 0.14401<br>281 -> 290 -0.14969                                                                                           |  |
| Excited State 22: Singlet-?Sym 2.6032<br>eV 476.27 nm $f=0.0429$ $\langle S^{*2} \rangle=0.000$<br>276 -> 286 -0.19807<br>277 -> 285 0.52740<br>278 -> 285 0.10511<br>279 -> 286 -0.37229                                                                                                                                             |  | Excited State 49: Singlet-?Sym 3.2823<br>eV 377.74 nm $f=0.0118$ $\langle S^{*2} \rangle=0.000$                                                                                  |                        | Excited State 64: Singlet-?Sym 3.4778<br>eV 356.50 nm $f=0.0854$ $\langle S^{*2} \rangle=0.000$                                                                                                                                                                            |  |
| Excited State 25: Singlet-?Sym 2.6927<br>eV 460.44 nm $f=0.0101$ $\langle S^{*2} \rangle=0.000$<br>277 -> 286 -0.23749<br>279 -> 285 0.17235<br>279 -> 287 -0.11353<br>280 -> 287 -0.11118<br>282 -> 287 0.58948                                                                                                                      |  | Excited State 50: Singlet-?Sym 3.3132<br>eV 374.21 nm $f=0.0645$ $\langle S^{*2} \rangle=0.000$                                                                                  |                        | 266 -> 284 -0.27543<br>269 -> 285 -0.12702<br>271 -> 286 -0.16394<br>272 -> 284 -0.14176<br>272 -> 286 0.18491<br>276 -> 288 -0.14199<br>277 -> 287 0.13089<br>279 -> 288 0.37920<br>281 -> 289 -0.26389                                                                   |  |
| Excited State 26: Singlet-?Sym 2.6982<br>eV 459.50 nm $f=0.0524$ $\langle S^{*2} \rangle=0.000$<br>276 -> 286 0.55383<br>279 -> 286 -0.21803<br>283 -> 287 0.29728                                                                                                                                                                    |  | Excited State 55: Singlet-?Sym 3.3332<br>eV 374.21 nm $f=0.0645$ $\langle S^{*2} \rangle=0.000$                                                                                  |                        | Excited State 69: Singlet-?Sym 3.5213<br>eV 352.09 nm $f=0.0157$ $\langle S^{*2} \rangle=0.000$                                                                                                                                                                            |  |
| Excited State 30: Singlet-?Sym 2.9024<br>eV 427.17 nm $f=0.0151$ $\langle S^{*2} \rangle=0.000$                                                                                                                                                                                                                                       |  | 271 -> 286 -0.14567<br>272 -> 284 0.10241<br>272 -> 286 0.26056<br>273 -> 285 -0.32001<br>275 -> 288 0.10282<br>277 -> 287 -0.20756<br>278 -> 287 0.34749<br>280 -> 288 -0.11762 |                        | 266 -> 284 -0.30684<br>268 -> 284 -0.24275<br>269 -> 285 0.11014<br>276 -> 288 0.14182<br>278 -> 289 0.13143<br>281 -> 289 0.11677<br>281 -> 290 0.49517                                                                                                                   |  |
|                                                                                                                                                                                                                                                                                                                                       |  | 277 -> 287 -0.20756<br>278 -> 287 0.34749<br>280 -> 288 -0.11762                                                                                                                 |                        | Excited State 72: Singlet-?Sym 3.5632<br>eV 347.96 nm $f=0.0368$ $\langle S^{*2} \rangle=0.000$                                                                                                                                                                            |  |
|                                                                                                                                                                                                                                                                                                                                       |  | 271 -> 286 -0.14567<br>272 -> 284 0.10241<br>272 -> 286 0.26056<br>273 -> 285 -0.32001<br>275 -> 288 0.10282<br>277 -> 287 -0.20756<br>278 -> 287 0.34749<br>280 -> 288 -0.11762 |                        | 266 -> 284 0.19168<br>267 -> 285 -0.10389<br>268 -> 284 -0.21477<br>269 -> 285 -0.21744<br>270 -> 286 -0.10625<br>272 -> 286 0.30288<br>274 -> 287 -0.18977<br>276 -> 288 0.21666<br>278 -> 290 0.10927<br>281 -> 289 -0.22347                                             |  |



|                                       |          |                                       |          |            |                        |
|---------------------------------------|----------|---------------------------------------|----------|------------|------------------------|
| 282 -> 291                            | 0.17219  | 264 -> 285                            | -0.13275 | 265 -> 285 | 0.26701 (14%) H-18→L+1 |
| Excited State 78: Singlet-?Sym 3.6132 |          | 265 -> 284                            | -0.19333 | 267 -> 285 | 0.10136                |
| eV 343.14 nm f=0.0124 <S**2>=0.000    |          | 265 -> 286                            | -0.19013 | 268 -> 284 | -0.12069               |
| 267 -> 285                            | -0.16213 | 266 -> 285                            | -0.25223 | 268 -> 286 | 0.24564 (12%) H-15→L+2 |
| 268 -> 286                            | -0.21803 | 267 -> 286                            | 0.35378  | 269 -> 285 | 0.11535                |
| 270 -> 286                            | 0.35445  | 268 -> 285                            | 0.10305  | 270 -> 286 | 0.33148 (22%) H-13→L+2 |
| 278 -> 290                            | -0.17844 | 269 -> 284                            | 0.14349  | 271 -> 286 | 0.21941                |
| 279 -> 288                            | 0.14178  | 277 -> 288                            | -0.11076 | 274 -> 287 | 0.12216                |
| 282 -> 291                            | 0.40461  | 279 -> 289                            | -0.27451 | 275 -> 288 | 0.16768                |
|                                       |          | 279 -> 290                            | 0.15526  | 276 -> 288 | 0.11704                |
| Excited State 79: Singlet-?Sym 3.6319 |          | Excited State 80: Singlet-?Sym 3.6348 |          | 277 -> 290 | -0.11886               |
| eV 341.38 nm f=0.0308 <S**2>=0.000    |          | eV 341.11 nm f=0.0813 <S**2>=0.000    |          | 278 -> 290 | 0.10298                |
|                                       |          |                                       |          | 281 -> 289 | -0.11030               |

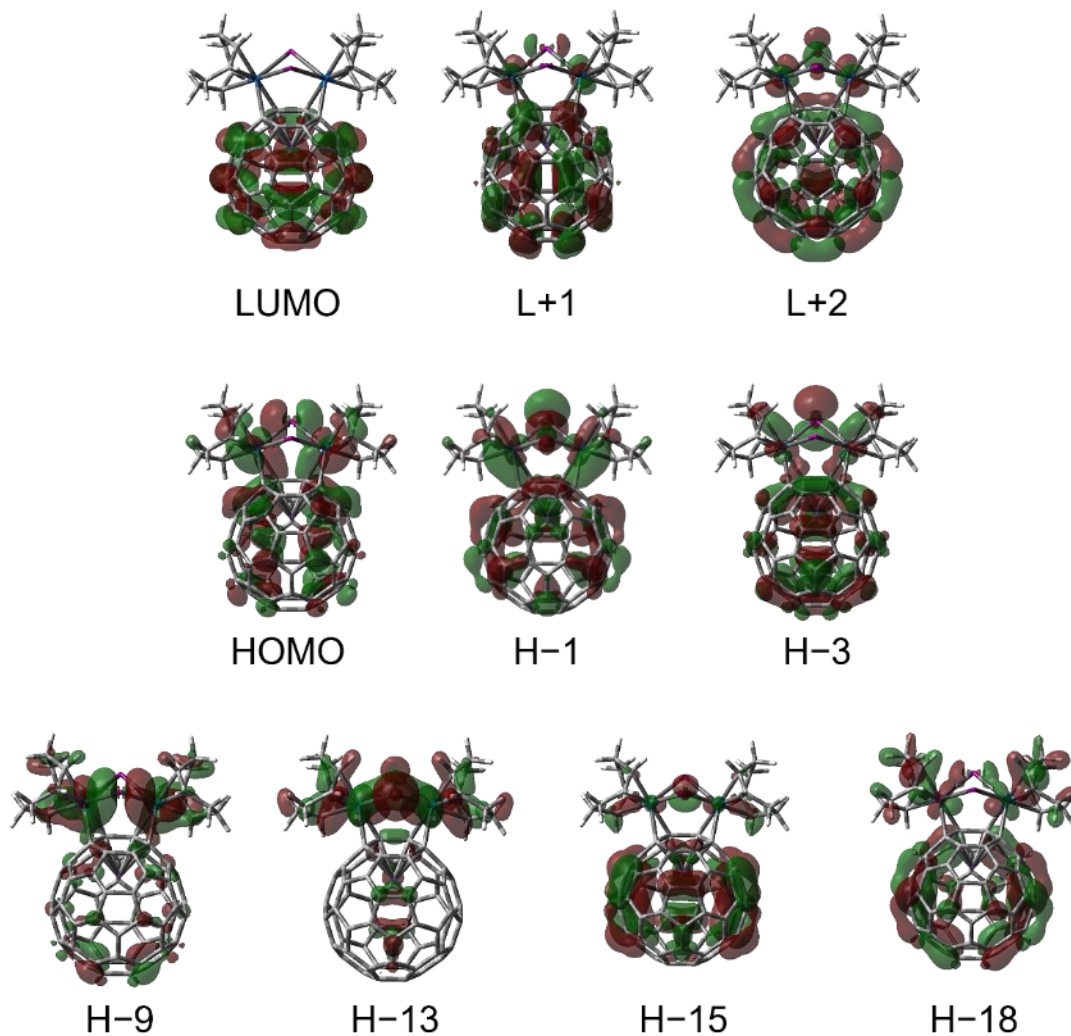

**Fig. S37** Kohn-Sham orbitals involved in the main transitions of **3** (isovalue = 0.02).

## 7. References

- [S1] L. Jürgensen, M. Frank, M. Pyeon, L. Czympiel and S. Mathur, *Organometallics*, 2017, **36**, 2331–2337.
- [S2] T. Yamagata, H. Tadaoka, M. Nagata, T. Hirao, Y. Kataoka, V. Ratovelomanana-Vidal, J. P. Genet and K. Mashima, *Organometallics*, 2006, **25**, 2505–2513.
- [S3] H. Okada and Y. Matsuo, *Fuller. Nanotub. Car. N.*, 2014, **22**, 262–268.
- [S4] G. M. Sheldrick, *Acta Cryst.*, 2015, **A71**, 3–8.
- [S5] G. M. Sheldrick, *Acta Cryst.*, 2015, **C71**, 3–8.
- [S6] O. V. Dolomanov, L. J. Bourhis, R. J. Gildea, J. A. K. Howard and H. Puschmann, *J. Appl. Cryst.*, 2009, **42**, 339–341.
- [S7] K. Wakita, *Yadokari-XG, Software for Crystal Structure Analyses*, 2001.
- [S8] C. Kabuto, S. Akine, T. Nemoto and E. Kwon, *J. Cryst. Soc. Jpn.*, 2009, **51**, 218–224.
- [S9] H. Okada, T. Komuro, T. Sakai, Y. Matsuo, Y. Ono, K. Omote, K. Yokoo, K. Kawachi, Y. Kasama, S. Ono, R. Hatakeyama, T. Kaneko and H. Tobita, *RSC Adv.* 2012, **2**, 10624–10631.
- [S10] M. J. Frisch, G. W. Trucks, H. B. Schlegel, G. E. Scuseria, M. A. Robb, J. R. Cheeseman, G. Scalmani, V. Barone, G. A. Petersson, H. Nakatsuji, X. Li, M. Caricato, A. V. Marenich, J. Bloino, B. G. Janesko, R. Gomperts, B. Mennucci, H. P. Hratchian, J. V. Ortiz, A. F. Izmaylov, J. L. Sonnenberg, D. W.-Young, F. Ding, F. Lipparini, F. Egidi, J. Goings, B. Peng, A. Petrone, T. Henderson, D. Ranasinghe, V. G. Zakrzewski, J. Gao, N. Rega, G. Zheng, W. Liang, M. Hada, M. Ehara, K. Toyota, R. Fukuda, J. Hasegawa, M. Ishida, T. Nakajima, Y. Honda, O. Kitao, H. Nakai, T. Vreven, K. Throssell, J. A. Montgomery, Jr., J. E. Peralta, F. Ogliaro, M. J. Bearpark, J. J. Heyd, E. N. Brothers, K. N. Kudin, V. N. Staroverov, T. A. Keith, R. Kobayashi, J. Normand, K. Raghavachari, A. P. Rendell, J. C. Burant, S. S. Iyengar, J. Tomasi, M. Cossi, J. M. Millam, M. Klene, C. Adamo, R. Cammi, J. W. Ochterski, R. L. Martin, K. Morokuma, O. Farkas, J. B. Foresman and D. J. Fox, *Gaussian 16, (Revision C.02)*, Gaussian, Inc., Wallingford CT, 2019.
- [S11] A. D. Becke, *J. Chem. Phys.*, 1993, **98**, 5648–5652.
- [S12] J. P. Perdew, *Electronic Structure of Solids '91*, ed. P. Ziesche and H. Eschrig, Akademie Verlag, Berlin, 1991, p. 11.
- [S13] J. P. Perdew, K. Burke and Y. Wang, *Phys. Rev. B*, 1996, **54**, 16533–16539.
- [S14] W. J. Hehre, R. Ditchfield and J. A. Pople, *J. Chem. Phys.*, 1972, **56**, 2257–2261.
- [S15] P. C. Hariharan and J. A. Pople, *Theor. Chim. Acta*, 1973, **28**, 213–222.

- [S16] M. M. Francl, W. J. Pietro, W. J. Hehre, J. S. Binkley, M. S. Gordon, D. J. DeFrees and J. A. Pople, *J. Chem. Phys.*, 1982, **77**, 3654–3665.
- [S17] P. J. Hay and W. R. Wadt, *J. Chem. Phys.*, 1985, **82**, 299–310.
- [S18] K. B. Wiberg, *Tetrahedron*, 1968, **24**, 1083–1096.
- [S19] A. E. Reed, R. B. Weinstock and F. Weinhold, *J. Chem. Phys.*, 1985, **83**, 735–746.
- [S20] E. D. Glendening, J. K. Badenhoop, A. E. Reed, J. E. Carpenter, J. A. Bohmann, C. M. Morales, P. Karafiloglou, C. R. Landis and F. Weinhold, *NBO 7.0*, Theoretical Chemistry Institute, University of Wisconsin, Madison, 2018.
- [S21] T. Clark, J. Chandrasekhar, G. W. Spitznagel and P. von R. Schleyer, *J. Comp. Chem.*, 1983, **4**, 294–301.
- [S22] W. T. Chan and R. Fournier, *Chem. Phys. Lett.*, 1999, **315**, 257–265.
- [S23] S. Grimme, J. Antony, S. Ehrlich and H. Krieg, *J. Chem. Phys.*, 2010, **132**, 154104.
- [S24] K. Wolinski, J. F. Hinton and P. Pulay, *J. Am. Chem. Soc.*, 1990, **112**, 8251–8260.
- [S25] F. Weigend and R. Ahlrichs, *Phys. Chem. Chem. Phys.*, 2005, **7**, 3297–3305.
- [S26] F. Weigend, *Phys. Chem. Chem. Phys.*, 2006, **8**, 1057–1065.
- [S27] A. V. Marenich, C. J. Cramer and D. G. Truhlar, *J. Phys. Chem. B*, 2009, **113**, 6378–6396.
